# Supplementary material for: Catalytic highly asymmetric 1,5(6)-selective cyclization reaction of α-hydroxyimino cyclic ketones: direct approach to ring-fused hydroxyimino dihydropyrans
Source: Royal Society of Chemistry journal article supplement (doi:10.1039/c3ob41001c), 2013-01-01

# Catalytic Highly Asymmetric 1,5(6)-Selective Cyclization Reaction of $\alpha$ -Hydroxyimino Cyclic Ketones: Direct Approach to Ring-Fused Hydroxyimino Dihydropyrans

Luping Liu,<sup>†,a</sup> Dekui Zhang,<sup>†,a,b</sup> Panpan Zhang,<sup>a</sup> Xianxing Jiang,<sup>a,\*</sup> and Rui Wang<sup>a,\*</sup>

*a* Key Laboratory of Preclinical Study for New Drugs of Gansu Province, School of Basic Medical Sciences. Department of Gastroenterology, the Second Hospital of Lanzhou University, Lanzhou University, Lanzhou 730000, China. e-mail: [wangrui@lzu.edu.cn](mailto:wangrui@lzu.edu.cn), and [xianxingjiang@gmail.com](mailto:xianxingjiang@gmail.com).

*b* Dept. Molecular & Medical Pharmacology, David Geffen School of Medicine, University of California, Los Angeles, CA 90095, USA

## Supporting Information

### Contents

- 1.0 General Methods for Procedure of Synthesis (S2)
- 2.0 General Procedure for Substrates (S2)
- 3.0 General Procedure for Asymmetric 1,5(6)-Selective Cyclization (S3)
- 4.0 Characterization Data (S3)
- 5.0 References (S11)
- 6.0 X-Ray Structure of **4f** (S11)
- 7.0 Copies of HPLC Spectra of Racemic /Chiral Products (S13)
- 8.0 Copies of NMR Spectra of Products (S30)

## 1.0 General Methods for Procedure of Synthesis:

All solvents were dried according to established procedures. Reactions were monitored by thin layer chromatography (TLC), column chromatography purifications were carried out using silica gel GF254. Proton nuclear magnetic resonance ( $^1\text{H}$  NMR) spectra were recorded on Bruker 300 MHz spectrometer in  $\text{CDCl}_3$  and carbon nuclear magnetic resonance ( $^{13}\text{C}$  NMR) spectra were recorded on 300 MHz spectrometer in  $\text{CDCl}_3$  using tetramethylsilane (TMS) as internal standard unless otherwise noted. Data are presented as follows: chemical shift, integration, multiplicity (br = broad, s = singlet, d = doublet, t = triplet, q = quartet, m = multiplet, cm = complex multiplet) and coupling constant in Hertz (Hz). Infrared (IR) spectra were recorded on a FT-IR spectrometer. Optical rotations were recorded on a Perkin-Elmer 341 polarimeter. HR-MS was measured with an APEX II 47e mass spectrometer. The ee values determination was carried out using chiral high-performance liquid chromatography (HPLC) with Daicel Chiracel AD-H column on Waters with a 2998 UV-detector and the dr values determined by 300 Hz  $^1\text{H}$  NMR. Thiourea catalysts were synthesized according to the procedures.<sup>1-3</sup>  $\beta$ ,  $\gamma$ -unsaturated  $\alpha$ -keto esters were synthesized according to the procedures.<sup>4</sup>

## 2.0 General Procedure for Substrates

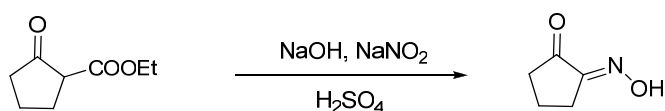

A solution of sodium hydroxide (11.0 g) in water (200 mL) was added slowly to ethyl 2-oxocyclopentanecarboxylate (42.5 g) in a narrow-mouthed bottle. A solution of sodium nitrite (17.2 g) in water (50 mL) was added. The bottle was tightly sealed and shaken mechanically for 48 hours at room temperature. The pale yellow solution was cooled to 0 °C and a small excess of cold sulfuric acid (6 N, 100 mL) was added with shaking. A considerable amount of gas was evolved. The solution was allowed to stand for 30 minutes and then extracted with ten 50-mL portions of ether. The ether solution was dried over magnesium sulfate (20 minutes, with shaking) and the solvent re-moved at 40 °C, then the last traces being removed by raising the temperature to

70 °C and reducing the pressure to 20 mm for 5 minutes. The crude product was applied to silica gel for purification of the pure product.

### 3.0 General Procedure for Asymmetric 1,5(6)-Selective Cyclization

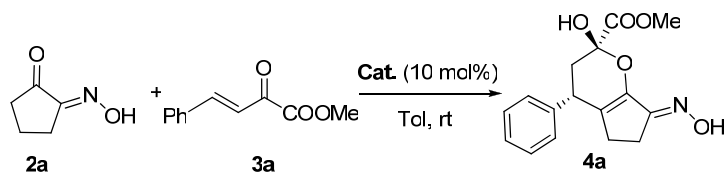

Catalyst **1c** (0.02 mmol, 10 mol%), 2-(hydroxyimino) cyclopentanone **2a** (0.2 mmol, 1 equiv) and (*E*)-methyl 2-oxo-4-phenylbut-3-enoate **3a** (0.24 mmol, 1.1 equiv), were dissolved in 1.0 mL toluene at room temperature. The reaction progress was monitored by TLC. After complete consumption of the **2a**, the mixture was applied to silica gel (CH<sub>2</sub>Cl<sub>2</sub>/EtOAc, 92:8) for purification of the desired product **4a**. The enantiomeric ratio was determined by HPLC on a chiral stationary phase, and the dr. was determined by <sup>1</sup>H NMR spectroscopy (300 Hz). **4b-q** were prepared using the same method.

### 4.0 Characterization Data

#### **4a:** (2*R*,4*S*,*E*)-methyl 2-hydroxy-7-(hydroxyimino)-4-phenyl-2,3,4,5,6,7-hexahydroclopenta[*b*]pyran-2-carboxylate

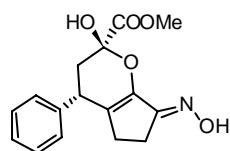

Prepared according to general procedure with CH<sub>2</sub>Cl<sub>2</sub>/EtOAc = 4/1 as to afford **4a** in 82% yield; [α]<sub>D</sub><sup>20</sup> = 34 (*c*=1.0, CHCl<sub>3</sub>). <sup>1</sup>H NMR (300 MHz, CDCl<sub>3</sub>): δ 7.19-7.36(m, 5 H), 3.81(br s, 4 H), 2.63-2.67(m, 2 H), 2.19-2.32(m, 4 H); <sup>13</sup>C NMR (75 MHz, CDCl<sub>3</sub>): δ 169.8, 159.9, 144.4, 140.8, 129.8, 128.8, 128.1, 127.1, 95.8, 53.3, 37.6, 37.1, 26.0, 23.0. **HRMS-ESI** (*m/z*): calcd for C<sub>16</sub>H<sub>17</sub>NO<sub>5</sub>+H<sup>+</sup>: 304.1179; found: 304.1188, 2.7ppm. **IR**: 3329.8, 2924.9, 1746.1, 1653.4, 1451.5, 1290.0, 1243.4, 1135.4, 931.1, 844.2cm<sup>-1</sup>. **HPLC**: ee of major diastereoisomer was determined by HPLC analysis (Chiralcel AD-H, *i*-PrOH/ Hexane = 30/70, 1.0mL/min, 255 nm.) Retention time: *t*<sub>minor</sub> = 30.42 min, *t*<sub>major</sub> = 18.53 min, ee = > 99%.

#### **4b:** (2*R*,4*S*,*E*)-methyl 4-(4-fluorophenyl)-2-hydroxy-7-(hydroxyimino)-2,3,4,5,6,7-

**hexahydrocyclopenta[*b*]pyran-2-carboxylate**

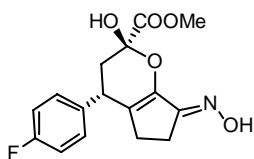

Prepared according to general procedure with CH<sub>2</sub>Cl<sub>2</sub>/EtOAc = 4/1 as to afford **4b** in 86% yield;  $[\alpha]_{\text{D}}^{20} = 92$  ( $c=1.0$ , CHCl<sub>3</sub>). **<sup>1</sup>H NMR** (300 MHz, CDCl<sub>3</sub>):  $\delta$  7.15-7.19(dd,  $J = 8.4$  Hz,  $J = 5.1$  Hz, 2 H), 7.00-

7.06(t,  $J = 8.4$  Hz, 2 H), 3.82(br s, 4 H), 2.61-2.69(m, 2 H), 2.05-2.32(m, 4 H); **<sup>13</sup>C NMR** (75 MHz, CDCl<sub>3</sub>):  $\delta$  169.6, 159.9, 144.5, 136.4, 129.6, 129.5, 115.8, 115.5, 95.8, 53.4, 37.1, 36.9, 25.9, 23.0. **HRMS-ESI** ( $m/z$ ): calcd for C<sub>16</sub>H<sub>16</sub>FNO<sub>5</sub>+H<sup>+</sup>: 322.1085; found: 322.1092, 2.0ppm. **IR**: 3336.3, 2927.3, 1749.0, 1707.5, 1654.1, 1509.6, 1441.3, 1292.4, 1227.6, 1136.4, 931.7, 844.7cm<sup>-1</sup>. **HPLC**: ee of major diastereoisomer was determined by HPLC analysis (Chiralcel AD-H, *i*-PrOH/Hexane = 30/70, 1.0mL/min, 255 nm.) Retention time:  $t_{\text{minor}} = 30.10$  min,  $t_{\text{major}} = 22.14$  min, ee = > 99%.

**4c: (2*R*,4*S*,*E*)-methyl 4-(2-fluorophenyl)-2-hydroxy-7-(hydroxyimino)-2,3,4,5,6,7-**

**hexahydrocyclopenta[*b*]pyran-2-carboxylate**

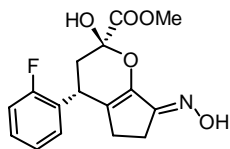

Prepared according to general procedure with CH<sub>2</sub>Cl<sub>2</sub>/EtOAc = 4/1 as to afford **4c** in 99% yield;  $[\alpha]_{\text{D}}^{20} = 146$  ( $c=1.0$ , CHCl<sub>3</sub>). **<sup>1</sup>H NMR** (300 MHz, CDCl<sub>3</sub>):  $\delta$  7.03-7.29(m, 4 H), 4.15-4.21(m, 1 H), 3.84(s, 3 H), 2.61-2.75(m,

2 H), 2.22-2.44(m, 4 H); **<sup>13</sup>C NMR** (75 MHz, CDCl<sub>3</sub>):  $\delta$  169.6, 162.7, 160.0, 159.4, 144.4, 129.7, 129.6, 129.0, 128.8, 127.4, 127.2, 124.52, 124.47, 116.0, 115.7, 95.6, 53.5, 35.0, 31.0, 26.0, 23.0. **HRMS-ESI** ( $m/z$ ): calcd for C<sub>16</sub>H<sub>16</sub>FNO<sub>5</sub>+H<sup>+</sup>: 322.1085; found: 322.1086, 0.2ppm. **IR**: 3331.2, 2926.3, 1749.1, 1708.0, 1755.3, 1491.3, 1452.8, 1290.7, 1231.2, 1137.5, 935.4, 761.34cm<sup>-1</sup>. **HPLC**: ee of major diastereoisomer was determined by HPLC analysis (Chiralcel AD-H, *i*-PrOH/Hexane = 40/60, 1.0mL/min, 260 nm.) Retention time:  $t_{\text{minor}} = 25.67$  min,  $t_{\text{major}} = 16.22$  min, ee = > 99%.

**4d: (2*R*,4*S*,*E*)-methyl 4-(4-chlorophenyl)-2-hydroxy-7-(hydroxyimino)-2,3,4,5,6,7-hex**

**ahydrocyclopenta[*b*]pyran-2-carboxylate**

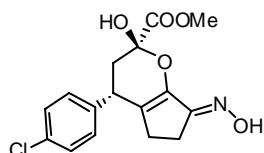

Prepared according to general procedure with  $\text{CH}_2\text{Cl}_2/\text{EtOAc} = 4/1$  as to afford **4d** in 99% yield;  $[\alpha]_{\text{D}}^{20} = 73$  ( $c=1.0$ ,  $\text{CHCl}_3$ ).  **$^1\text{H NMR}$**  (300 MHz,  $\text{CDCl}_3$ ):  $\delta$  7.27-7.33(d,  $J = 8.1$  Hz, 2 H), 7.13-7.16(d,  $J = 8.4$  Hz, 2 H), 3.83(br s, 4 H), 2.62-2.72(m, 2 H), 2.18-2.29(m, 4 H);  **$^{13}\text{C NMR}$**  (75 MHz,  $\text{CDCl}_3$ ):  $\delta$  169.5, 159.8, 144.6, 139.3, 132.9, 129.4, 129.1, 129.0, 95.6, 53.5, 37.0, 36.9, 25.9, 23.0. **HRMS-ESI** ( $m/z$ ): calcd for  $\text{C}_{16}\text{H}_{16}\text{ClNO}_5 + \text{H}^+$ : 338.0790; found: 338.0794, 1.3ppm. **IR**: 3325.0, 2925.2, 2855.2, 1749.6, 1654.3, 1490.0, 1441.8, 1293.9, 1234.3, 1136.9, 931.4, 842.8 $\text{cm}^{-1}$ . **HPLC**: ee of major diastereoisomer was determined by HPLC analysis (Chiralcel AD-H, *i*-PrOH/ Hexane = 30/70, 1.0mL/min, 255 nm.) Retention time:  $t_{\text{minor}} = 37.50$  min,  $t_{\text{major}} = 24.58$  min, ee = > 99%.

**4e: (2R,4S,E)-methyl 4-(3-chlorophenyl)-2-hydroxy-7-(hydroxyimino)-2,3,4,5,6,7-hexahydrocyclopenta[b]pyran-2-carboxylate**

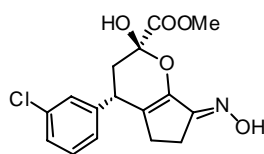

Prepared according to general procedure with  $\text{CH}_2\text{Cl}_2/\text{EtOAc} = 4/1$  as to afford **4e** in 99% yield;  $[\alpha]_{\text{D}}^{20} = 5$  ( $c=1.0$ ,  $\text{CHCl}_3$ ).  **$^1\text{H NMR}$**  (300 MHz,  $\text{CDCl}_3$ ):  $\delta$  7.28-7.31(m, 1 H), 7.20-7.24(m, 2 H), 7.09-7.11(m, 1 H), 3.78-3.84(m, 4 H), 2.64-2.70(m, 2 H), 2.20-2.29(m, 4 H);  **$^{13}\text{C NMR}$**  (75 MHz,  $\text{CDCl}_3$ ):  $\delta$  169.5, 159.9, 144.6, 142.9, 134.6, 130.1, 128.9, 128.2, 127.4, 126.3, 95.6, 53.5, 37.4, 36.8, 25.9, 23.0. **HRMS-ESI** ( $m/z$ ): calcd for  $\text{C}_{16}\text{H}_{16}\text{ClNO}_5 + \text{H}^+$ : 338.0790; found: 338.0794, 1.2ppm. **IR**: 3312.6, 2924.6, 2854.9, 1747.0, 1653.2, 1436.4, 1287.0, 1236.2, 1135.9, 935.5, 788.8 $\text{cm}^{-1}$ . **HPLC**: ee of major diastereoisomer was determined by HPLC analysis (Chiralcel AD-H, *i*-PrOH/ Hexane = 40/60, 1.0mL/min, 255 nm.) Retention time:  $t_{\text{minor}} = 19.59$  min,  $t_{\text{major}} = 13.63$  min, ee = 99%.

**4f: (2R,4S,E)-methyl 4-(4-bromophenyl)-2-hydroxy-7-(hydroxyimino)-2,3,4,5,6,7-hexahydrocyclopenta[b]pyran-2-carboxylate**

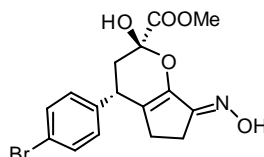

Prepared according to general procedure with  $\text{CH}_2\text{Cl}_2/\text{EtOAc} = 4/1$  as to afford **4f** in 92% yield;  $[\alpha]_{\text{D}}^{20} = 47$  ( $c=1.0$ ,  $\text{CHCl}_3$ ).  **$^1\text{H NMR}$**  (300 MHz,  $\text{CDCl}_3$ ):  $\delta$  7.46-7.48(d,  $J = 8.1$  Hz, 2 H), 7.07-7.10(d,  $J = 8.4$  Hz, 2 H), 3.77-3.84(m, 4 H), 2.56-2.73(m, 2 H), 2.10-2.32(m, 4 H);  **$^{13}\text{C NMR}$**  (75 MHz,  $\text{CDCl}_3$ ):  $\delta$  169.5,

159.9, 144.6, 139.8, 132.0, 129.8, 129.0, 121.0, 95.6, 53.5, 37.1, 36.8, 25.9, 23.0. **HRMS-ESI** ( $m/z$ ): calcd for  $C_{16}H_{16}BrNO_5+H^+$ : 382.0285; found: 382.0292, 1.9ppm. **IR**: 3313.2, 2925.1, 1747.0, 1709.7, 1654.4, 1486.7, 1442.6, 1291.5, 1241.4, 1136.6, 931.6 $cm^{-1}$ . **HPLC**: ee of major diastereoisomer was determined by HPLC analysis (Chiralcel AD-H, *i*-PrOH/ Hexane = 30/70, 1.0mL/min, 255 nm.) Retention time:  $t_{minor}$  = 39.42 min,  $t_{major}$  = 25.44 min, ee = 99%.

**4g: (2R,4S,E)-methyl 4-(3-bromophenyl)-2-hydroxy-7-(hydroxyimino)-2,3,4,5,6,7-**

**hexahydrocyclopenta[*b*]pyran-2-carboxylate**

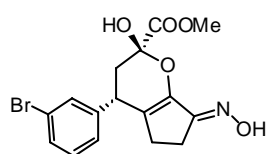

Prepared according to general procedure with  $CH_2Cl_2/EtOAc$  = 4/1 as to afford **4g** in 99% yield;  $[\alpha]_D^{20}$  = 87 ( $c=1.0$ ,  $CHCl_3$ ).  **$^1H$  NMR** (300 MHz,  $CDCl_3$ ):  $\delta$  7.36-7.42(m, 2 H), 7.22-7.25(m, 1 H), 7.13-7.20(m, 1 H),

3.81-3.84(m, 4 H), 2.66-2.69(m, 2 H), 2.20-2.30(m, 4 H);  **$^{13}C$  NMR** (75 MHz,  $CDCl_3$ ):  $\delta$  169.5, 159.8, 144.7, 143.2, 131.1, 130.4, 130.3, 128.9, 126.8, 122.8, 95.6, 53.5, 37.3, 36.8, 25.9, 23.0.

**HRMS-ESI** ( $m/z$ ): calcd for  $C_{16}H_{16}BrNO_5+H^+$ : 382.0285; found: 382.0287, 0.5ppm. **IR**: 3330.9, 2927.2, 2855.4, 1750.1, 1709.4, 1654.1, 1436.0, 1288.4, 1232.2, 1137.1, 934.0, 824.2 $cm^{-1}$ . **HPLC**: ee of major diastereoisomer was determined by HPLC analysis (Chiralcel AD-H, *i*-PrOH/ Hexane = 40/60, 1.0mL/min, 255 nm.) Retention time:  $t_{minor}$  = 9.07 min,  $t_{major}$  = 6.29 min, ee = 97%.

**4h: (2R,4S,E)-methyl 4-(2-bromo-6-fluorophenyl)-2-hydroxy-7-(hydroxyimino)-2,3,4,**

**5,6,7-hexahydrocyclopenta[*b*]pyran-2-carboxylate**

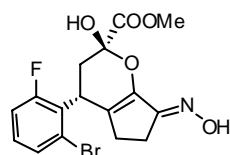

Prepared according to general procedure with  $CH_2Cl_2/EtOAc$  = 4/1 as to afford **4h** in 78% yield;  $[\alpha]_D^{20}$  = 59 ( $c=1.0$ ,  $CHCl_3$ ).  **$^1H$  NMR** (300 MHz,  $CDCl_3$ ): 7.51-7.56(dd,  $J$  = 8.4 Hz,  $J$  = 5.1 Hz, 1 H), 6.84-6.91(m, 2 H),

4.37-4.43(m, 1 H), 3.82(s, 3 H), 2.61-2.78(m, 2 H), 2.02-2.45(m, 4 H);  **$^{13}C$  NMR** (75 MHz,  $CDCl_3$ ):  $\delta$  169.4, 159.6, 145.6, 142.2, 134.2, 127.7, 118.7, 116.1, 116.0, 115.7, 95.7, 53.5, 37.1,

35.6, 25.8, 23.0. **HRMS-ESI** ( $m/z$ ): calcd for  $C_{16}H_{15}BrNO_5+H^+$ : 400.1090; found: 400.1093, 0.6ppm. **IR**: 3436.0, 2926.7, 1749.6, 1653.2, 1467.9, 1276.6, 1238.2, 1135.3, 1026.4, 922.1, 731.7 $cm^{-1}$ . **HPLC**: ee of major diastereoisomer was determined by HPLC analysis (Chiralcel AD-

H, *i*-PrOH/ Hexane = 40/60, 1.0mL/min, 255 nm.) Retention time:  $t_{\text{minor}} = 8.29$  min,  $t_{\text{major}} = 23.39$  min, ee = 99%.

**4i: (2*R*,4*S*,*E*)-methyl 2-hydroxy-7-(hydroxyimino)-4-(4-(trifluoromethyl)phenyl)-2,3,4,5,6,7-hexahydrocyclopenta[*b*]pyran-2-carboxylate**

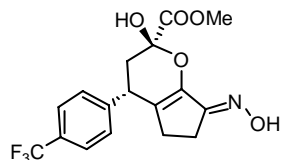

Prepared according to general procedure with CH<sub>2</sub>Cl<sub>2</sub>/EtOAc = 4/1 as to afford **4i** in 99% yield;  $[\alpha]_{\text{D}}^{20} = 59$  ( $c=1.0$ , CHCl<sub>3</sub>). **<sup>1</sup>H NMR** (300 MHz, CDCl<sub>3</sub>):  $\delta$  7.60-7.62(d,  $J = 7.8$  Hz, 2 H), 7.32-7.35(d,  $J = 7.8$  Hz, 2 H), 3.84-3.94(m, 4 H), 2.59-2.76(m, 2 H), 2.18-2.31(m, 4 H); **<sup>13</sup>C NMR** (75 MHz, CDCl<sub>3</sub>):  $\delta$  169.5, 159.7, 145.0, 144.9, 129.8, 129.3, 128.5, 125.9, 125.8, 95.6, 53.5, 37.5, 36.9, 25.9, 23.0. **HRMS-ESI** ( $m/z$ ): calcd for C<sub>17</sub>H<sub>16</sub>F<sub>3</sub>NO<sub>5</sub>+H<sup>+</sup>: 372.1053; found: 372.1063, 2.6ppm. **IR**: 3332.2, 2928.5, 1751.3, 1710.5, 1654.9, 1442.2, 1326.1, 1293.5, 1131.9, 1066.9, 932.8, 850.4cm<sup>-1</sup>. **HPLC**: ee of major diastereoisomer was determined by HPLC analysis (Chiralcel AD-H, *i*-PrOH/ Hexane = 40/60, 1.0mL/min, 255 nm.) Retention time:  $t_{\text{minor}} = 17.08$  min,  $t_{\text{major}} = 14.03$  min, ee = > 99%.

**4j: (2*R*,4*S*,*E*)-methyl 2-hydroxy-7-(hydroxyimino)-4-*p*-tolyl-2,3,4,5,6,7-hexahydrocyclopenta[*b*]pyran-2-carboxylate**

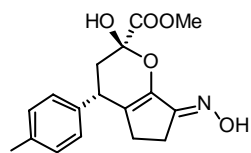

Prepared according to general procedure with CH<sub>2</sub>Cl<sub>2</sub>/EtOAc = 4/1 as to afford **4j** in 65% yield;  $[\alpha]_{\text{D}}^{20} = 78$  ( $c=1.0$ , CHCl<sub>3</sub>). **<sup>1</sup>H NMR** (300 MHz, CDCl<sub>3</sub>):  $\delta$  7.07-7.16(q,  $J = 8.4$  Hz, 4 H), 3.82(m, 4 H), 2.61-2.68(m, 2 H), 2.34(s, 3 H), 2.18-2.29(m, 4 H); **<sup>13</sup>C NMR** (75 MHz, CDCl<sub>3</sub>):  $\delta$  169.7, 160.1, 144.2, 137.7, 136.7, 130.3, 129.5, 127.9, 95.8, 53.3, 37.1, 26.0, 23.0, 21.0. **HRMS-ESI** ( $m/z$ ): calcd for C<sub>17</sub>H<sub>19</sub>NO<sub>5</sub>+H<sup>+</sup>: 318.1336; found: 318.1336, 0.1ppm. **IR**: 3330.1, 2925.8, 2856.5, 1749.2, 1707.8, 1654.0, 1513.2, 1441.3, 1291.3, 1236.9, 1136.8, 932.1cm<sup>-1</sup>. **HPLC**: ee of major diastereoisomer was determined by HPLC analysis (Chiralcel AD-H, *i*-PrOH/ Hexane = 50/50, 1.0mL/min, 258 nm.) Retention time:  $t_{\text{minor}} = 22.00$  min,  $t_{\text{major}} = 15.03$  min, ee = >99%.

**4k: (2*R*,4*S*,*E*)-methyl 2-hydroxy-7-(hydroxyimino)-4-*m*-tolyl-2,3,4,5,6,7-hexahydrocyclopenta[*b*]pyran-2-carboxylate**

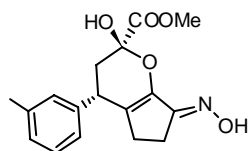

Prepared according to general procedure with  $\text{CH}_2\text{Cl}_2/\text{EtOAc} = 4/1$  as to afford **4k** in 66% yield;  $[\alpha]_{\text{D}}^{20} = 65$  ( $c=1.0$ ,  $\text{CHCl}_3$ ).  $^1\text{H NMR}$  (300 MHz,  $\text{CDCl}_3$ ):  $\delta$  7.20-7.23(d,  $J = 7.8$  Hz, 1 H), 7.07-7.09(d,  $J = 7.5$  Hz, 1 H), 6.99-7.01(m, 2 H), 3.75-3.84(m, 4 H), 2.63-2.68(m, 2 H), 2.35(s, 3 H), 2.19-2.31(m, 4 H);  $^{13}\text{C NMR}$  (75 MHz,  $\text{CDCl}_3$ ):  $\delta$  169.7, 160.1, 144.3, 140.7, 138.5, 130.1, 128.8, 128.7, 127.9, 125.1, 95.6, 53.5, 37.4, 36.9, 26.0, 22.9, 21.4. **HRMS-ESI** ( $m/z$ ): calcd for  $\text{C}_{17}\text{H}_{19}\text{NO}_5 + \text{H}^+$ : 318.1336; found: 318.1345, 2.7 ppm. **IR**: 3433.3, 2924.3, 2854.2, 1749.5, 1652.8, 1443.1, 1290.0, 1254.6, 1136.3, 915.5, 708.6  $\text{cm}^{-1}$ . **HPLC**: ee of major diastereoisomer was determined by HPLC analysis (Chiralcel AD-H, *i*-PrOH/ Hexane = 40/60, 1.0 mL/min, 255 nm.) Retention time:  $t_{\text{major}} = 7.08$  min, ee = > 99%.

**4l: (2R,4S,E)-methyl 2-hydroxy-7-(4-methoxyphenyl)-2,3,4,5,6,7-hexahydrocyclopenta[b]pyran-2-carboxylate**

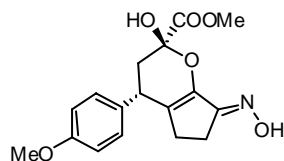

Prepared according to general procedure with  $\text{CH}_2\text{Cl}_2/\text{EtOAc} = 4/1$  as to afford **4l** in 70% yield;  $[\alpha]_{\text{D}}^{20} = 77$  ( $c=1.0$ ,  $\text{CHCl}_3$ ).  $^1\text{H NMR}$  (300 MHz,  $\text{CDCl}_3$ ):  $\delta$  7.11-7.14(d,  $J = 8.7$  Hz, 2 H), 6.87-6.90(dd,  $J = 6.6$  Hz,  $J = 1.8$  Hz, 2 H), 3.85(s, 3 H), 3.81(br s, 4 H), 2.64-2.69(m, 2 H), 2.19-2.30(m, 4 H);  $^{13}\text{C NMR}$  (75 MHz,  $\text{CDCl}_3$ ):  $\delta$  169.8, 160.1, 158.6, 144.2, 132.7, 130.4, 129.0, 114.2, 95.8, 55.3, 53.4, 37.1, 36.7, 26.0, 23.0. **HRMS-ESI** ( $m/z$ ): calcd for  $\text{C}_{17}\text{H}_{19}\text{NO}_6 + \text{H}^+$ : 334.1285; found: 334.1286, 0.1 ppm. **IR**: 3335.7 2928.7 1748.8, 1652.9 1612.1, 1512.2 1443.7 1295.2 1248.5, 1135.9, 931.2, 838.0  $\text{cm}^{-1}$ . **HPLC**: ee of major diastereoisomer was determined by HPLC analysis (Chiralcel AD-H, *i*-PrOH/ Hexane = 40/60, 1.0 mL/min, 256 nm.) Retention time:  $t_{\text{minor}} = 28.18$  min,  $t_{\text{major}} = 18.57$  min, ee = 99%.

**4m: (2R,4S,E)-methyl 2-hydroxy-7-(thiophen-2-yl)-2,3,4,5,6,7-hexahydrocyclopenta[b]pyran-2-carboxylate**

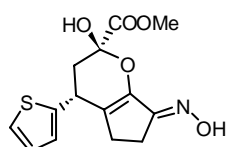

Prepared according to general procedure with  $\text{CH}_2\text{Cl}_2/\text{EtOAc} = 4/1$  as to



afford **4m** in 80% yield;  $[\alpha]_D^{20} = 83$  ( $c=1.0$ ,  $\text{CHCl}_3$ ).  **$^1\text{H NMR}$**  (300 MHz,  $\text{CDCl}_3$ ):  $\delta$  7.21-7.23(d,  $J = 5.1$  Hz, 1 H), 6.92-6.99(m, 2 H), 4.17-4.23(t,  $J = 8.7$  Hz, 1 H), 3.85(s, 3 H), 2.59-2.73(m, 2 H), 2.29-2.41(m, 4 H);  **$^{13}\text{C NMR}$**  (75 MHz,  $\text{CDCl}_3$ ):  $\delta$  169.5, 160.0, 143.6, 129.6, 126.9, 125.4, 124.2, 95.7, 53.5, 53.4, 37.1, 32.7, 26.0, 23.0. **HRMS-ESI** ( $m/z$ ): calcd for  $\text{C}_{14}\text{H}_{15}\text{NO}_5 + \text{H}^+$ : 310.0744; found: 310.0753, 2.9ppm. **IR**: 3337.7, 2925.3, 1749.0, 1707.2, 1653.5, 1439.3, 1293.6, 1233.0, 1133.8, 928.9  $704.4\text{cm}^{-1}$ . **HPLC**: ee of major diastereoisomer was determined by HPLC analysis (Chiralcel AD-H, *i*-PrOH/ Hexane = 40/60, 1.0mL/min, 253 nm.) Retention time:  $t_{\text{minor}} = 36.86$  min,  $t_{\text{major}} = 26.13$  min, ee = > 99%.

**4n: (2R,4S,E)-ethyl 2-hydroxy-7-(hydroxyimino)-4-phenyl-2,3,4,5,6,7-hexahydro-cyclopenta[b]pyran-2-carboxylate**

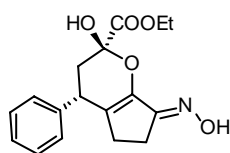

Prepared according to general procedure with  $\text{CH}_2\text{Cl}_2/\text{EtOAc} = 4/1$  as to afford **4n** in 81% yield;  $[\alpha]_D^{20} = 10$  ( $c=1.0$ ,  $\text{CHCl}_3$ ).  **$^1\text{H NMR}$**  (300 MHz,  $\text{CDCl}_3$ ):  $\delta$  7.28-7.38(m, 3 H), 7.21-7.23(m, 2 H), 4.24-4.33(qd,  $J = 11.7$  Hz,  $J = 4.5$  Hz, 2 H), 3.79-3.86(t,  $J = 9.3$  Hz, 1 H), 2.63-2.69(m, 2 H), 2.19-2.31(m, 4 H), 1.29-1.34(t,  $J = 14.4$  Hz, 3 H);  **$^{13}\text{C NMR}$**  (75 MHz,  $\text{CDCl}_3$ ):  $\delta$  169.2, 160.1, 144.5, 140.9, 129.9, 128.8, 128.1, 127.1, 95.6, 63.0, 37.6, 37.0, 26.0, 23.0, 13.9. **HRMS-ESI** ( $m/z$ ): calcd for  $\text{C}_{17}\text{H}_{19}\text{NO}_5 + \text{H}^+$ : 318.1336; found: 318.1338, 0.7ppm. **IR**: 3338.6, 2924.6, 2855.2, 1741.9, 1651.5, 1455.1, 1292.3, 1240.5, 1136.1, 1026.1,  $934.9\text{cm}^{-1}$ . **HPLC**: ee of major diastereoisomer was determined by HPLC analysis (Chiralcel AD-H, *i*-PrOH/ Hexane = 30/70, 1.0mL/min, 254 nm.) Retention time:  $t_{\text{minor}} = 16.91$  min,  $t_{\text{major}} = 9.55$  min, ee = 99%.

**4o: (2R,4S,E)-isopropyl 2-hydroxy-7-(hydroxyimino)-4-phenyl-2,3,4,5,6,7-hexahydro-drocyclopenta[b]pyran-2-carboxylate**

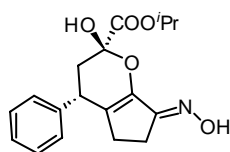

Prepared according to general procedure with  $\text{CH}_2\text{Cl}_2/\text{EtOAc} = 4/1$  as to afford **4o** in 85% yield;  $[\alpha]_D^{20} = 99$  ( $c=1.0$ ,  $\text{CHCl}_3$ ).  **$^1\text{H NMR}$**  (300 MHz,  $\text{CDCl}_3$ ):  $\delta$  7.20-7.38(m, 5 H), 5.06-5.14(m, 1 H), 3.79-3.85(t,  $J = 9$  Hz, 1 H), 2.55-2.75(m, 2 H), 2.19-2.28(m, 4 H), 1.27-1.32(dd,  $J = 8.7$  Hz,  $J = 6.3$  Hz, 6 H);  **$^{13}\text{C NMR}$**  (75

MHz, CDCl<sub>3</sub>): δ 168.8, 160.0, 144.7, 141.0, 129.7, 128.8, 128.1, 127.1, 95.6, 71.0, 37.7, 37.0, 26.0, 23.0, 21.51, 21.48. **HRMS-ESI** (*m/z*): calcd for C<sub>18</sub>H<sub>21</sub>NO<sub>5</sub>+H<sup>+</sup>: 332.1492; found: 347.1498, 1.6ppm. **IR**: 3276.5, 2927.7, 1740.2, 1654.3, 1454.5, 1291.7, 1236.1, 1141.4, 1103.5, 936.0, 845.9, 704.1cm<sup>-1</sup>. **HPLC**: ee of major diastereoisomer was determined by HPLC analysis (Chiralcel AD-H, *i*-PrOH/ Hexane = 30/70, 1.0mL/min, 254 nm.) Retention time: *t*<sub>minor</sub> = 16.72 min, *t*<sub>major</sub> = 8.70 min, ee = 99%.

**4p: (2*R*,4*S*,*E*)-benzyl 4-(3-fluorophenyl)-2-hydroxy-7-(hydroxyimino)-2,3,4,5,6,7-hexahydrocyclopenta[*b*]pyran-2-carboxylate**

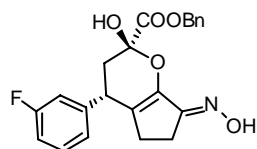

Prepared according to general procedure with CH<sub>2</sub>Cl<sub>2</sub>/EtOAc = 4/1 as to afford **4p** in 65% yield; [α]<sub>D</sub><sup>20</sup> = 110 (*c*=1.0, CHCl<sub>3</sub>). **<sup>1</sup>H NMR** (300 MHz, CDCl<sub>3</sub>): δ 7.33(br s, 5 H), 7.11-7.16(dd, *J* = 11.4 Hz, *J* = 8.4 Hz, 2 H), 6.98-7.04(t, *J* = 8.7 Hz, 2 H), 5.18-5.29(q, *J* = 12.3 Hz, 2 H), 3.79-3.84(m, 1 H), 2.53-2.70(m, 2 H), 2.14-2.40(m, 4 H); **<sup>13</sup>C NMR** (75 MHz, CDCl<sub>3</sub>): δ 169.0, 163.5, 160.2, 159.8, 144.5, 136.5, 134.7, 129.6, 129.5, 128.6, 128.5, 128.3, 128.1, 115.8, 115.5, 95.8, 68.2, 37.0, 336.9, 25.9, 23.0. **HRMS-ESI** (*m/z*): calcd for C<sub>22</sub>H<sub>20</sub>FNO<sub>5</sub>+H<sup>+</sup>: 398.1398; found: 398.1400, 0.4ppm. **IR**: 3434.1, 2926.8, 1746.6, 1652.4, 1509.6, 1288.3, 1226.4, 1136.0, 1092.8, 932.2, 734.2cm<sup>-1</sup>. **HPLC**: ee of major diastereoisomer was determined by HPLC analysis (Chiralcel AD-H, *i*-PrOH / Hexane = 30/70, 1.0mL/min, 255 nm.) Retention time: *t*<sub>minor</sub> = 27.90 min, *t*<sub>major</sub> = 12.02 min, ee = 99%.

**4q: (2*R*,4*S*,*E*)-methyl 2-hydroxy-8-(hydroxyimino)-4-phenyl-3,4,5,6,7,8-hexahydro-2H-chromene-2-carboxylate**

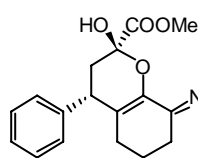

Prepared according to general procedure with CH<sub>2</sub>Cl<sub>2</sub>/EtOAc = 1/2 as to afford **4q** in 70% yield; [α]<sub>D</sub><sup>20</sup> = 32 (*c*=1.0, CHCl<sub>3</sub>). **<sup>1</sup>H NMR** (300 MHz, CDCl<sub>3</sub>): δ 7.20-7.35(m, 5 H), 3.80-3.92(m, 3 H), 3.69-3.75(t, *J* = 10.5 Hz, 1 H), 2.85-2.94(m, 1 H), 2.23-2.45(m, 3 H), 1.85-1.87(d, *J* = 5.4 Hz, 2 H), 1.63-1.71m, 2 H); **<sup>13</sup>C NMR** (75 MHz, CDCl<sub>3</sub>): δ 170.2, 151.6, 141.8, 139.6, 128.8, 128.6, 128.4, 127.0, 94.1, 53.3, 39.8, 37.6, 26.5, 23.0, 20.7. **HRMS-ESI** (*m/z*): calcd for C<sub>17</sub>H<sub>19</sub>NO<sub>5</sub>+H<sup>+</sup>: 318.1336; found: 318.1335,

0.2ppm. **IR**: 3313.0, 2926.5, 2857.1, 1748.3, 1452.0, 1295.2, 1235.1, 1140.2, 910.8, 733.6, 703.2  $\text{cm}^{-1}$ . **HPLC**: ee of major diastereoisomer was determined by HPLC analysis (Chiralcel AD-H, *i*-PrOH / Hexane = 30/70, 1.0mL/min, 255 nm.) Retention time:  $t_{\text{major}} = 7.42$  min, ee = >99%.

## 5.0 References

1. X. X. Jiang, Y. F. Zhang, A. S. C. Chan and R. Wang, *Org. Lett.*, 2009, **11**, 153.
2. X. X. Jiang, Y. F. Zhang, X. Liu, G. Zhang, L. H. Lai, L. P. Wu, J. N. Zhang and R. Wang, *J. Org. Chem.*, 2009, **74**, 5562.
3. X. X. Jiang, Y. F. Zhang, L. P. Wu, G. Zhang, X. Liu, H. L. Zhang, D. Fu and R. Wang, *Adv. Synth. Catal.*, 2009, **351**, 2096.
4. Y. C. Wu, L. Liu, H. J. Li, D. Wang and Y. J. Chen, *J. Org. Chem.* 2006, **71**, 6592.

## 6.0 Absolute Configuration and X-Ray Analysis Data

(2*R*,4*S*,*E*)-methyl 4-(4-bromophenyl)-2-hydroxy-7-(hydroxyimino)-2,3,4,5,6,7-hexahydrocyclopenta[*b*]pyran-2-carboxylate (**4f**):

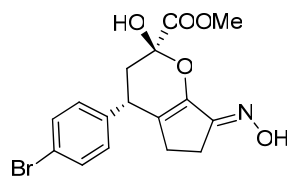

CCDC Number: 931435

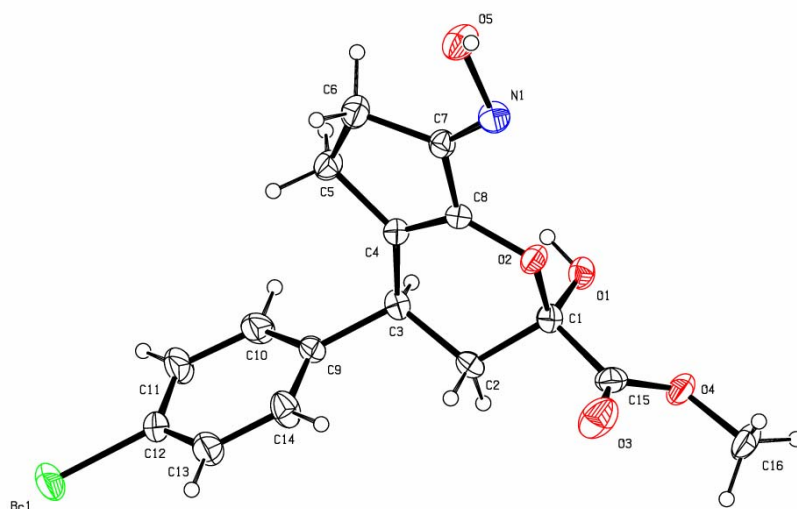

---

|                                |                                              |                                 |
|--------------------------------|----------------------------------------------|---------------------------------|
| Bond precision: C-C = 0.0078 Å |                                              | Wavelength=0.71073              |
| Cell:                          | a=7.907(8)      b=8.093(8)      c=12.534(13) |                                 |
|                                | alpha=90      beta=101.397(9)      gamma=90  |                                 |
| Temperature:                   | 296 K                                        |                                 |
|                                | Calculated                                   | Reported                        |
| Volume                         | 786.3(14)                                    | 786.2(14)                       |
| Space group                    | P 21                                         | P2(1)                           |
| Hall group                     | P 2yb                                        | ?                               |
| Moiety formula                 | C16 H16 Br N O5                              | ?                               |
| Sum formula                    | C16 H16 Br N O5                              | C16 H16 Br N O5                 |
| Mr                             | 382.20                                       | 382.21                          |
| Dx,g cm-3                      | 1.614                                        | 1.614                           |
| Z                              | 2                                            | 2                               |
| Mu (mm-1)                      | 2.639                                        | 2.639                           |
| F000                           | 388.0                                        | 388.0                           |
| F000'                          | 387.62                                       |                                 |
| h,k,lmax                       | 9,9,15                                       | 9,9,15                          |
| Nref                           | 1572[ 2920]                                  | 2877                            |
| Tmin,Tmax                      | 0.550,0.656                                  | 0.582,0.677                     |
| Tmin'                          | 0.540                                        |                                 |
| Correction method= MULTI-SCAN  |                                              |                                 |
| Data completeness= 1.83/0.99   |                                              | Theta(max)= 25.490              |
| R(reflections)= 0.0489( 2032)  |                                              | wR2(reflections)= 0.1218( 2877) |
| S = 1.009                      | Npar= 211                                    |                                 |

---

## 7.0 Copies of HPLC Spectra of Racemic and Chiral Product

### 4a: (2*R*,4*S*,*E*)-methyl 2-hydroxy-7-(hydroxyimino)-4-phenyl-2,3,4,5,6,7-hexahydroclopenta[*b*]pyran-2-carboxylate

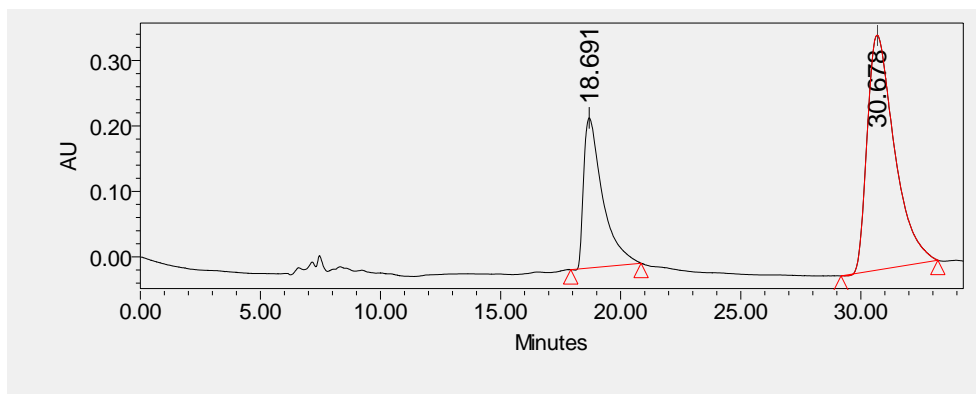

| Entry | Retention Time | Area     | Area (%) | Height | Int Type | Peak Type |
|-------|----------------|----------|----------|--------|----------|-----------|
| 1     | 18.691         | 12551312 | 30.75    | 229293 | bb       | Unknown   |
| 2     | 30.678         | 28262353 | 69.25    | 358708 | bb       | Unknown   |

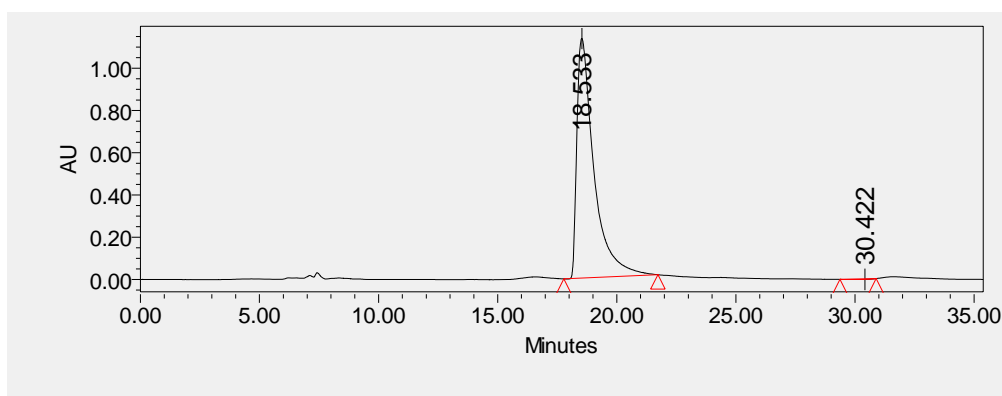

| Entry | Retention Time | Area     | Area (%) | Height  | Int Type | Peak Type |
|-------|----------------|----------|----------|---------|----------|-----------|
| 1     | 18.533         | 56514736 | 99.73    | 1134763 | bb       | Unknown   |
| 2     | 30.422         | 150657   | 0.27     | -2574   | bb       | Unknown   |

**4b: (2*R*,4*S*,*E*)-methyl 4-(4-fluorophenyl)-2-hydroxy-7-(hydroxyimino)-2,3,4,5,6,7-hexahydrocyclopenta[*b*]pyran-2-carboxylate**

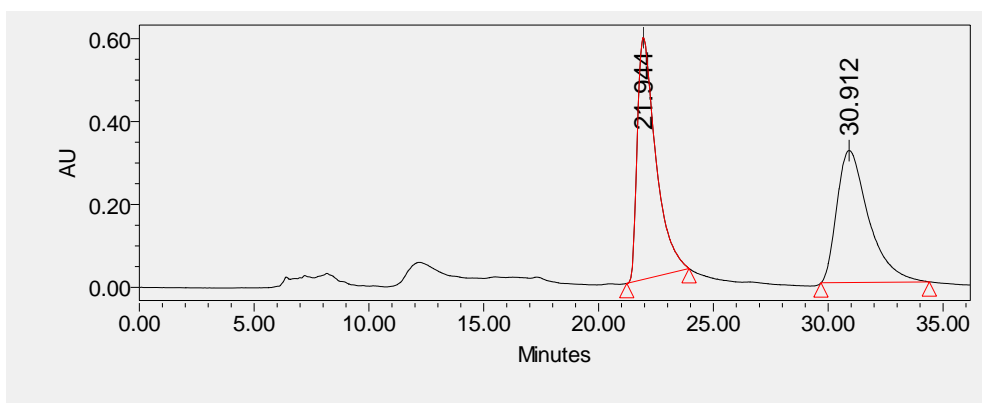

| Entry | Retention Time | Area     | Area (%) | Height | Int Type | Peak Type |
|-------|----------------|----------|----------|--------|----------|-----------|
| 1     | 21.944         | 32830327 | 51.79    | 583453 | bb       | Unknown   |
| 2     | 30.912         | 30566687 | 48.21    | 318214 | bb       | Unknown   |

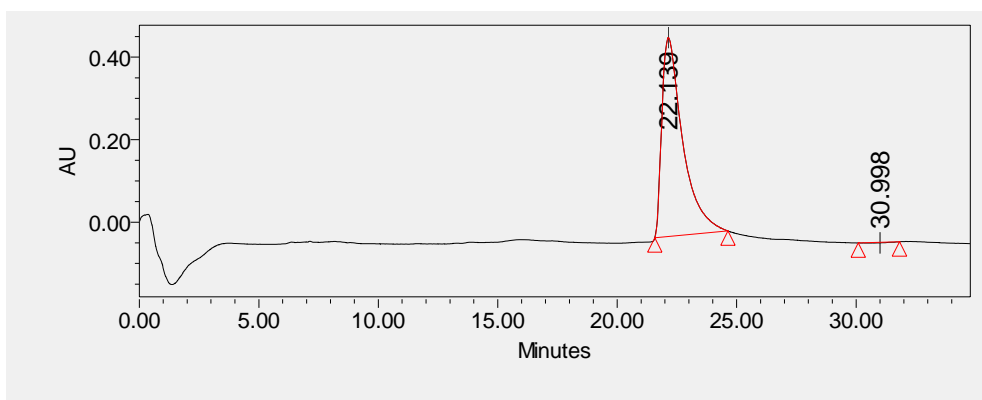

| Entry | Retention Time | Area     | Area (%) | Height | Int Type | Peak Type |
|-------|----------------|----------|----------|--------|----------|-----------|
| 1     | 22.139         | 29149594 | 99.71    | 481819 | bb       | Unknown   |
| 2     | 30.998         | 85790    | 0.29     | -1438  | bb       | Unknown   |

**4c: (2*R*,4*S*,*E*)-methyl 4-(2-fluorophenyl)-2-hydroxy-7-(hydroxyimino)-2,3,4,5,6,7  
hexahydrocyclopenta[*b*]pyran-2-carboxylate**

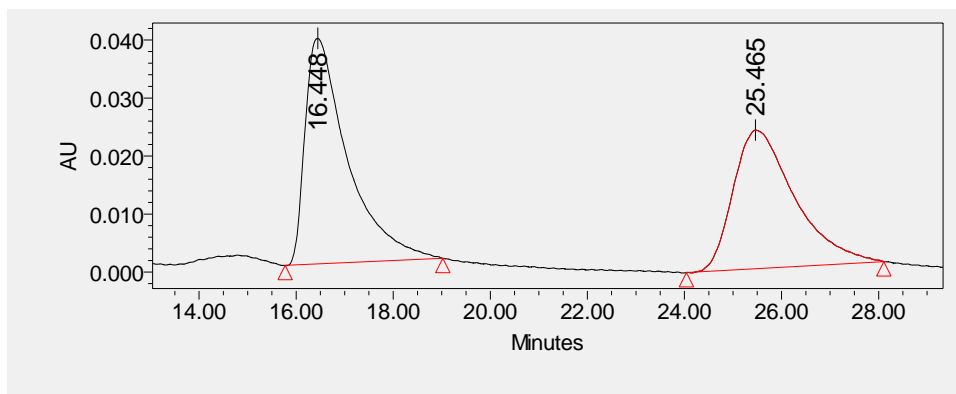

| Entry | Retention Time | Area    | Area (%) | Height | Int Type | Peak Type |
|-------|----------------|---------|----------|--------|----------|-----------|
| 1     | 16.448         | 2363909 | 52.98    | 38873  | bb       | Unknown   |
| 2     | 25.465         | 2097849 | 47.02    | 23903  | bb       | Unknown   |

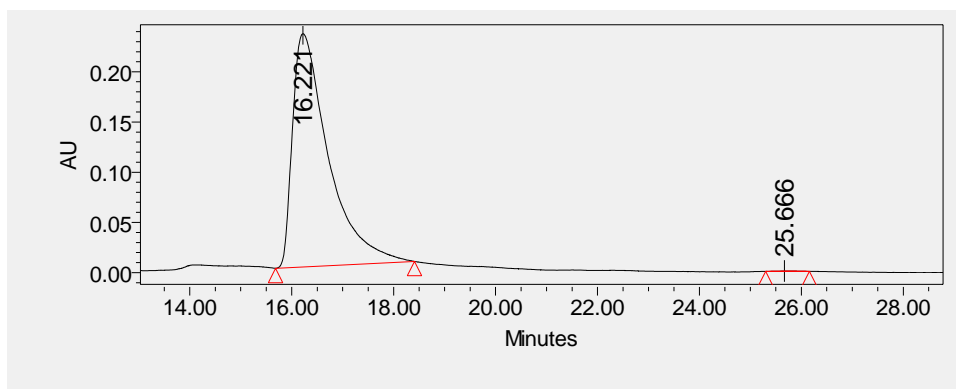

| Entry | Retention Time | Area     | Area (%) | Height | Int Type | Peak Type |
|-------|----------------|----------|----------|--------|----------|-----------|
| 1     | 16.221         | 11334293 | 99.90    | 232126 | bb       | Unknown   |
| 2     | 25.666         | 10989    | 0.10     | 382    | bb       | Unknown   |

**4d: (2*R*,4*S*,*E*)-methyl 4-(4-chlorophenyl)-2-hydroxy-7-(hydroxyimino)-2,3,4,5,6,7-hexahydrocyclopenta[*b*]pyran-2-carboxylate**

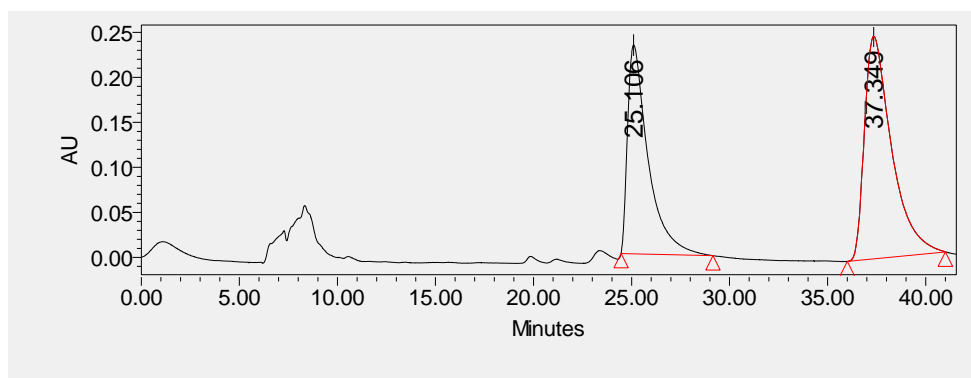

| Entry | Retention Time | Area     | Area (%) | Height | Int Type | Peak Type |
|-------|----------------|----------|----------|--------|----------|-----------|
| 1     | 25.106         | 16826508 | 41.44    | 231787 | bb       | Unknown   |
| 2     | 37.349         | 23778914 | 58.56    | 247017 | bb       | Unknown   |

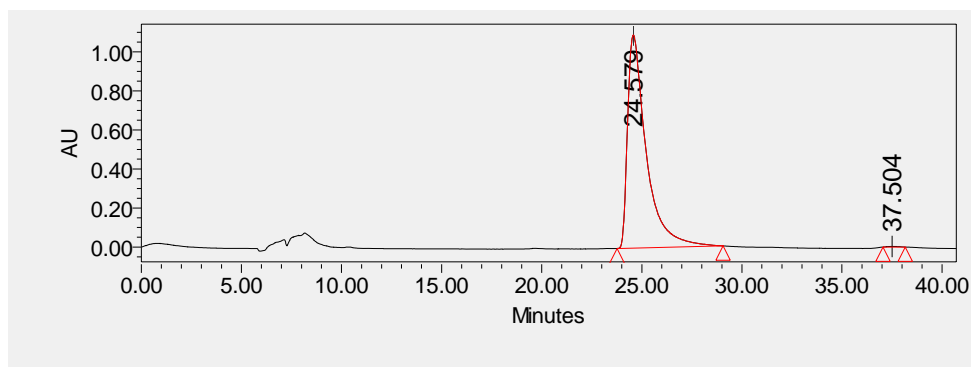

| Entry | Retention Time | Area     | Area (%) | Height  | Int Type | Peak Type |
|-------|----------------|----------|----------|---------|----------|-----------|
| 1     | 24.579         | 70959052 | 99.83    | 1092141 | bb       | Unknown   |
| 2     | 37.504         | 118832   | 0.17     | 2901    | bb       | Unknown   |



**4e: (2*R*,4*S*,*E*)-methyl 4-(3-chlorophenyl)-2-hydroxy-7-(hydroxyimino)-2,3,4,5,6,7-hexahydrocyclopenta[*b*]pyran-2-carboxylate**

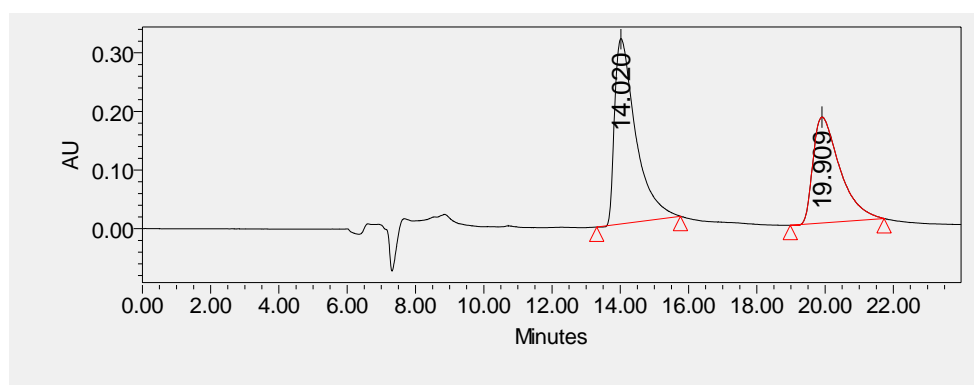

| Entry | Retention Time | Area     | Area (%) | Height | Int Type | Peak Type |
|-------|----------------|----------|----------|--------|----------|-----------|
| 1     | 14.020         | 13575294 | 57.78    | 316282 | bb       | Unknown   |
| 2     | 19.909         | 9920995  | 42.22    | 180783 | bb       | Unknown   |

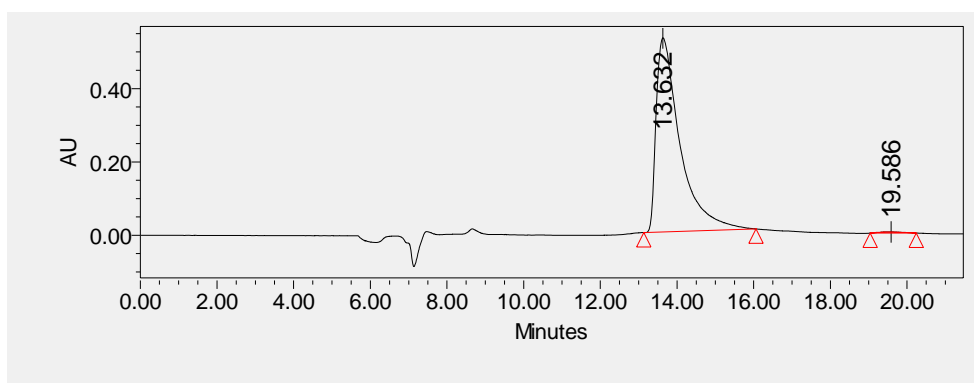

| Entry | Retention Time | Area     | Area (%) | Height | Int Type | Peak Type |
|-------|----------------|----------|----------|--------|----------|-----------|
| 1     | 13.632         | 22906968 | 99.41    | 529428 | bb       | Unknown   |
| 2     | 19.586         | 135258   | 0.59     | 3211   | bb       | Unknown   |

**4f: (2*R*,4*S*,*E*)-methyl 4-(4-bromophenyl)-2-hydroxy-7-(hydroxyimino)-2,3,4,5,6,7-hexahydrocyclopenta[*b*]pyran-2-carboxylate**

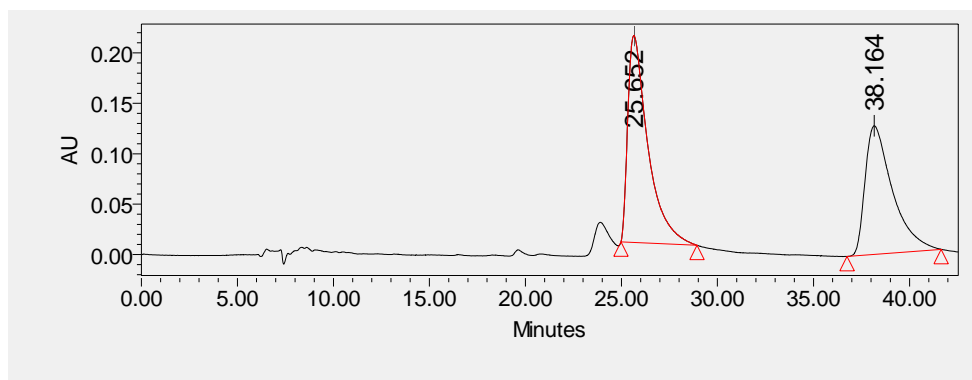

| Entry | Retention Time | Area     | Area (%) | Height | Int Type | Peak Type |
|-------|----------------|----------|----------|--------|----------|-----------|
| 1     | 25.652         | 14955101 | 54.22    | 205308 | bb       | Unknown   |
| 2     | 38.164         | 12624616 | 45.78    | 127547 | bb       | Unknown   |

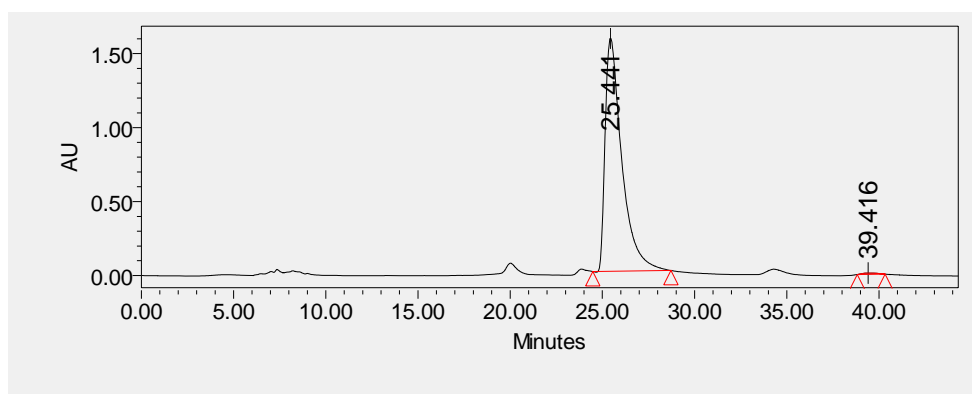

| Entry | Retention Time | Area     | Area (%) | Height  | Int Type | Peak Type |
|-------|----------------|----------|----------|---------|----------|-----------|
| 1     | 25.441         | 99095584 | 99.52    | 1576197 | bb       | Unknown   |
| 2     | 39.416         | 478307   | 0.48     | 8565    | bb       | Unknown   |

**4g: (2*R*,4*S*,*E*)-methyl 4-(3-bromophenyl)-2-hydroxy-7-(hydroxyimino)-2,3,4,5,6,7-hexahydrocyclopenta[*b*]pyran-2-carboxylate**

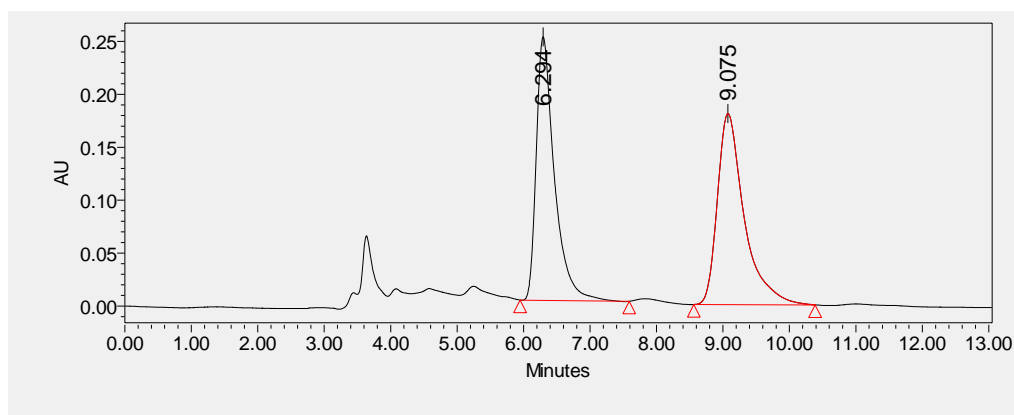

| Entry | Retention Time | Area    | Area (%) | Height | Int Type | Peak Type |
|-------|----------------|---------|----------|--------|----------|-----------|
| 1     | 6.294          | 4718211 | 48.31    | 248972 | bb       | Unknown   |
| 2     | 9.075          | 5048773 | 51.69    | 180533 | bb       | Unknown   |

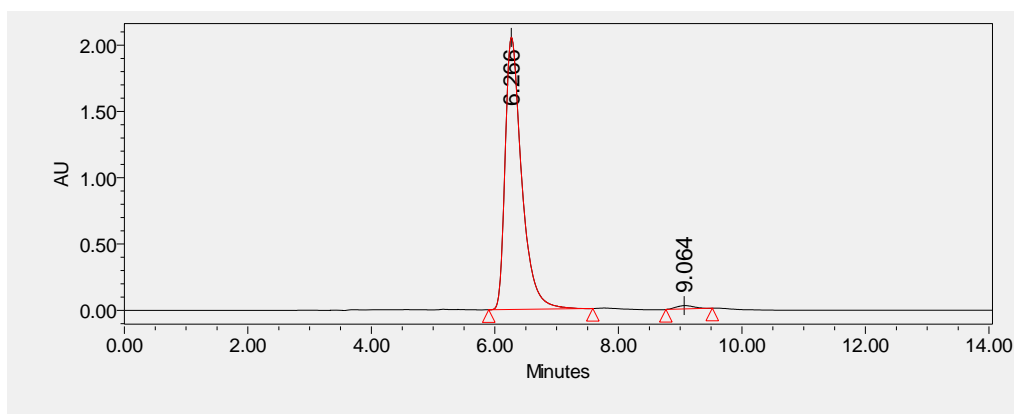

| Entry | Retention Time | Area     | Area (%) | Height  | Int Type | Peak Type |
|-------|----------------|----------|----------|---------|----------|-----------|
| 1     | 6.266          | 38179262 | 98.71    | 2051778 | bb       | Unknown   |
| 2     | 9.064          | 500898   | 1.29     | 25237   | bb       | Unknown   |

**4h: (2*R*,4*S*,*E*)-methyl 4-(2-bromo-6-fluorophenyl)-2-hydroxy-7-(hydroxyimino)-2,3,4,5,6,7-hexahydrocyclopenta[*b*]pyran-2-carboxylate**

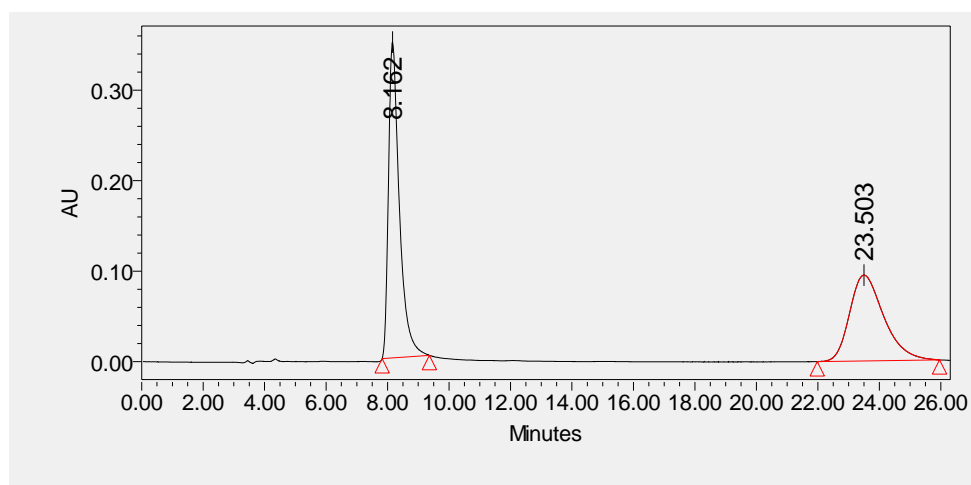

| Entry | Retention Time | Area    | Area (%) | Height | Int Type | Peak Type |
|-------|----------------|---------|----------|--------|----------|-----------|
| 1     | 8.162          | 8591819 | 54.04    | 348916 | bb       | Unknown   |
| 2     | 23.503         | 7305840 | 45.96    | 94822  | bb       | Unknown   |

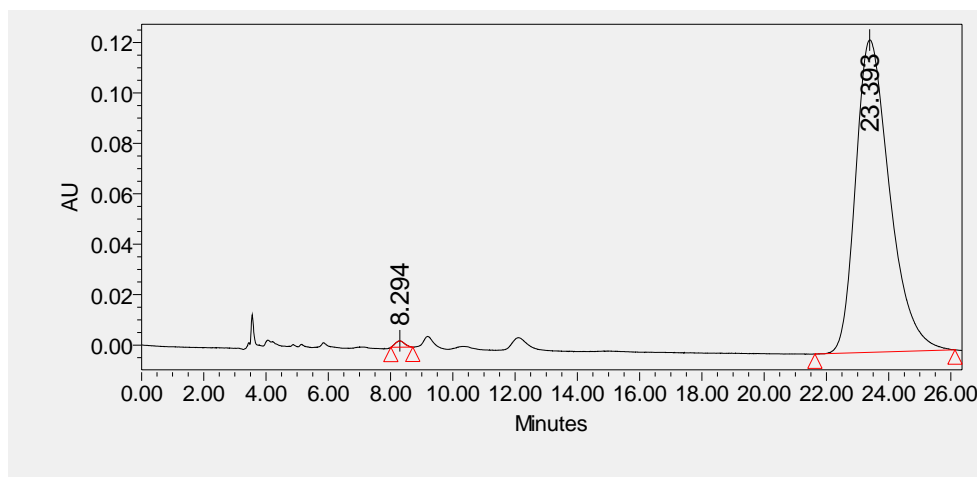

| Entry | Retention Time | Area    | Area (%) | Height | Int Type | Peak Type |
|-------|----------------|---------|----------|--------|----------|-----------|
| 1     | 8.294          | 52706   | 0.56     | 2534   | bb       | Unknown   |
| 2     | 23.393         | 9408449 | 99.44    | 123923 | bb       | Unknown   |

**4i: (2*R*,4*S*,*E*)-methyl 2-hydroxy-7-(hydroxyimino)-4-(4-(trifluoromethyl)phenyl)-2,3,4,5,6,7-hexahydrocyclopenta[*b*]pyran-2-carboxylate**

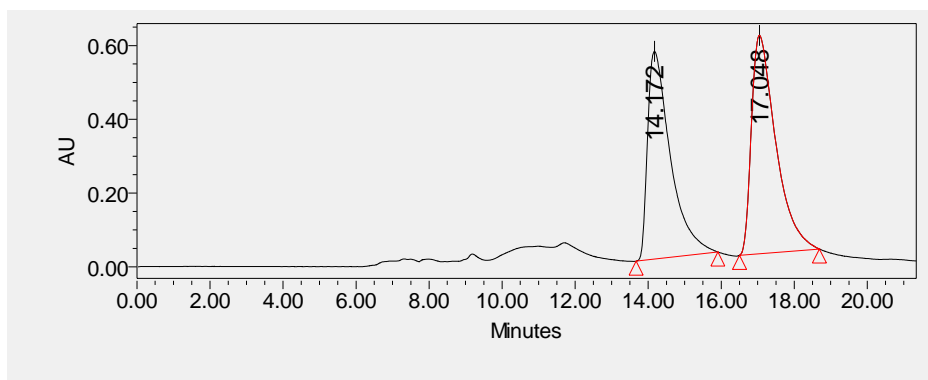

| Entry | Retention Time | Area     | Area (%) | Height | Int Type | Peak Type |
|-------|----------------|----------|----------|--------|----------|-----------|
| 1     | 14.172         | 24485420 | 47.15    | 563199 | bb       | Unknown   |
| 2     | 17.048         | 27442332 | 52.85    | 592481 | bb       | Unknown   |

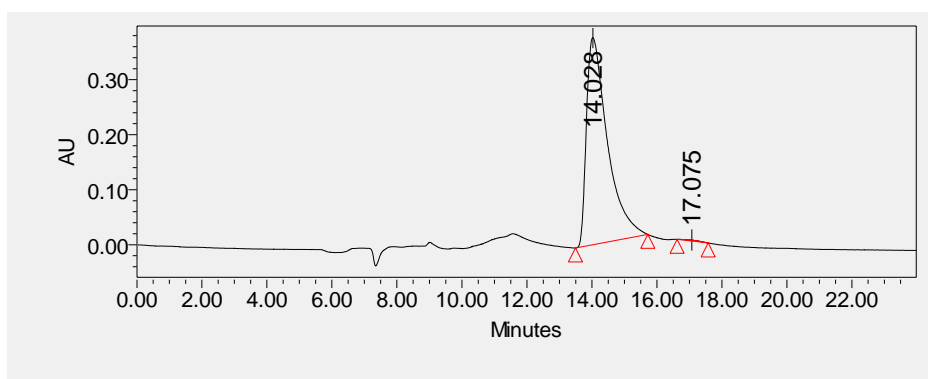

| Entry | Retention Time | Area     | Area (%) | Height | Int Type | Peak Type |
|-------|----------------|----------|----------|--------|----------|-----------|
| 1     | 14.028         | 16844860 | 99.63    | 376386 | bb       | Unknown   |
| 2     | 17.075         | 62655    | 0.37     | 1897   | bb       | Unknown   |

**4j: (2*R*,4*S*,*E*)-methyl 2-hydroxy-7-(hydroxyimino)-4-*p*-tolyl-2,3,4,5,6,7-hexahydro-cyclopenta[*b*]pyran-2-carboxylate**

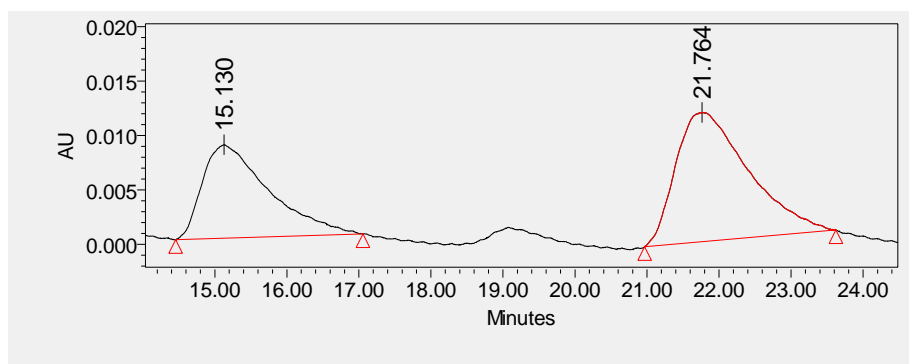

| Entry | Retention Time | Area   | Area (%) | Height | Int Type | Peak Type |
|-------|----------------|--------|----------|--------|----------|-----------|
| 1     | 15.130         | 548792 | 39.77    | 8584   | bb       | Unknown   |
| 2     | 21.764         | 831144 | 60.23    | 11863  | bb       | Unknown   |

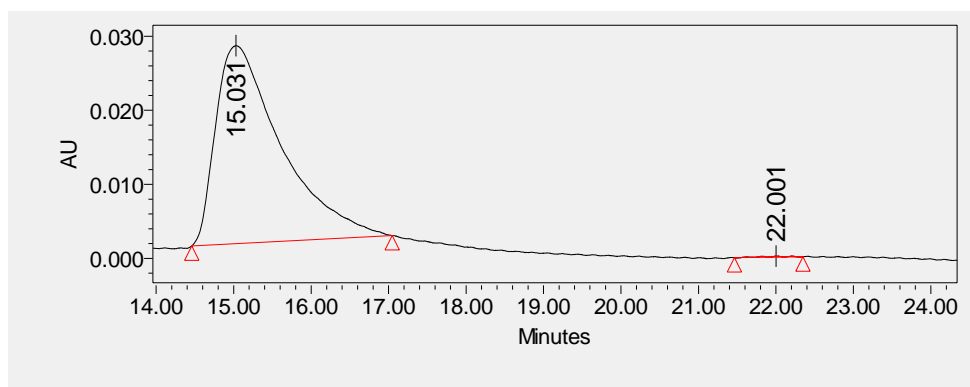

| Entry | Retention Time | Area    | Area (%) | Height | Int Type | Peak Type |
|-------|----------------|---------|----------|--------|----------|-----------|
| 1     | 15.031         | 1566934 | 99.81    | 26768  | bb       | Unknown   |
| 2     | 22.001         | 2961    | 0.19     | 132    | bb       | Unknown   |

**4k: (2*R*,4*S*,*E*)-methyl 2-hydroxy-7-(hydroxyimino)-4-*m*-tolyl-2,3,4,5,6,7-hexahydro-cyclopenta[*b*]pyran-2-carboxylate**

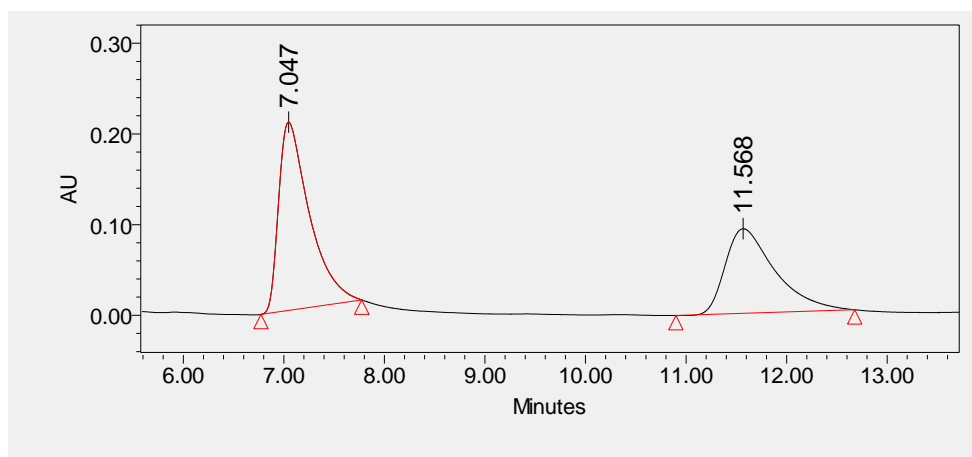

| Entry | Retention Time | Area    | Area (%) | Height | Int Type | Peak Type |
|-------|----------------|---------|----------|--------|----------|-----------|
| 1     | 7.047          | 4422071 | 57.95    | 207758 | bb       | Unknown   |
| 2     | 11.568         | 3208114 | 42.05    | 93339  | bb       | Unknown   |

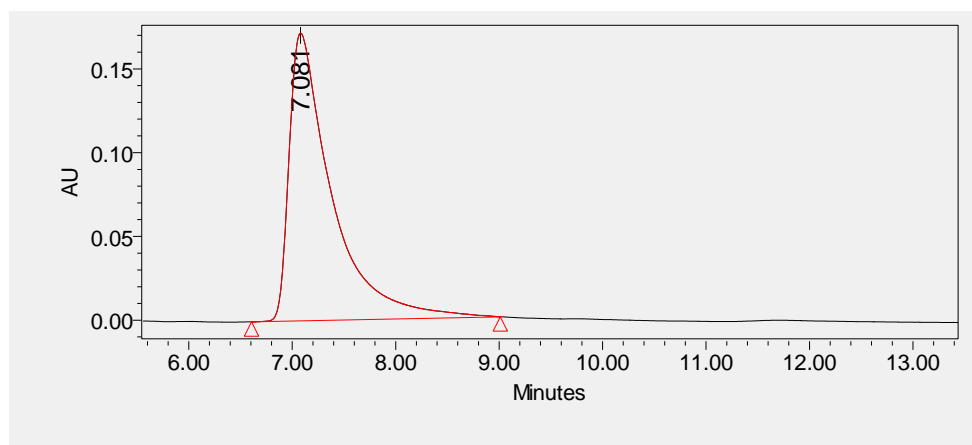

| Entry | Retention Time | Area    | Area (%) | Height | Int Type | Peak Type |
|-------|----------------|---------|----------|--------|----------|-----------|
| 1     | 7.081          | 4901204 | 100.00   | 171710 | bb       | Unknown   |

**4l: (2*R*,4*S*,*E*)-methyl 2-hydroxy-7-(hydroxyimino)-4-(4-methoxyphenyl)-2,3,4,5,6,7-hexahydrocyclopenta[*b*]pyran-2-carboxylate**

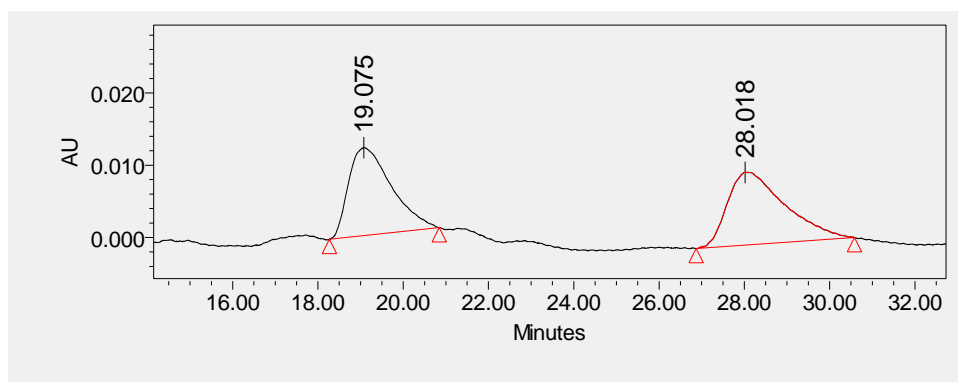

| Entry | Retention Time | Area   | Area (%) | Height | Int Type | Peak Type |
|-------|----------------|--------|----------|--------|----------|-----------|
| 1     | 19.075         | 847831 | 47.49    | 12163  | bb       | Unknown   |
| 2     | 28.018         | 937280 | 52.51    | 10060  | bb       | Unknown   |

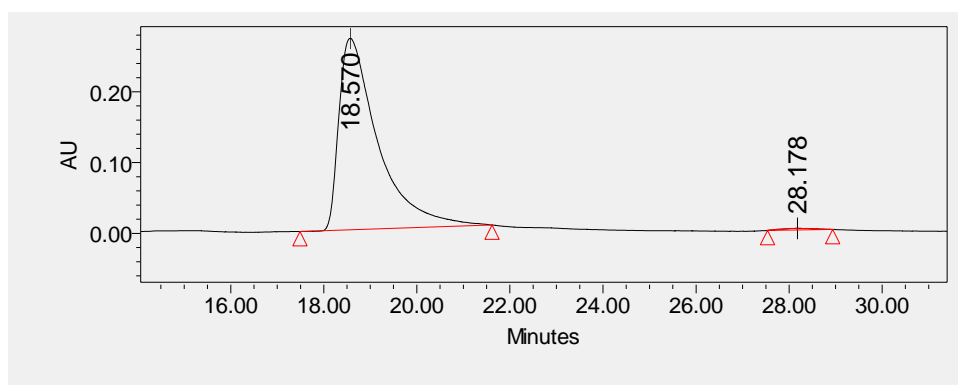

| Entry | Retention Time | Area     | Area (%) | Height | Int Type | Peak Type |
|-------|----------------|----------|----------|--------|----------|-----------|
| 1     | 18.570         | 15755350 | 99.29    | 270483 | bb       | Unknown   |
| 2     | 28.178         | 112583   | 0.71     | 2272   | bb       | Unknown   |



**4m: (2*R*,4*S*,*E*)-methyl 2-hydroxy-7-(hydroxyimino)-4-(thiophen-2-yl)-2,3,4,5,6,7-hexahydrocyclopenta[*b*]pyran-2-carboxylate**

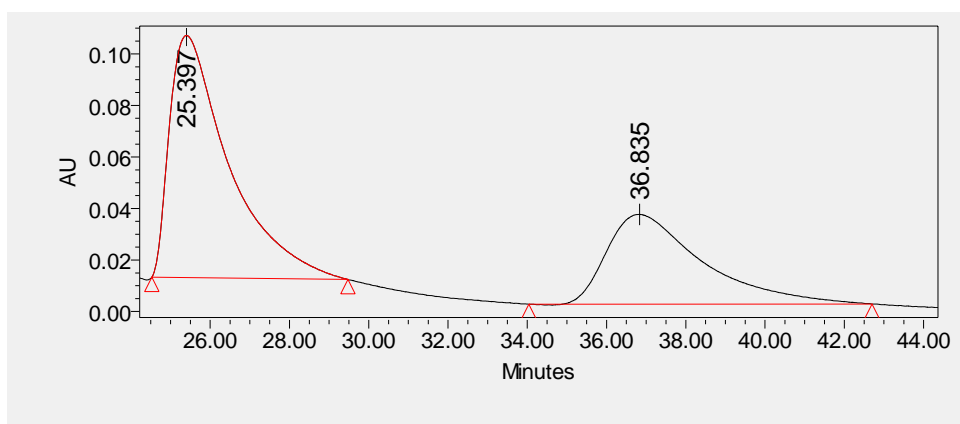

| Entry | Retention Time | Area    | Area (%) | Height | Int Type | Peak Type |
|-------|----------------|---------|----------|--------|----------|-----------|
| 1     | 25.397         | 9782852 | 62.60    | 94019  | bb       | Unknown   |
| 2     | 36.835         | 5844782 | 37.40    | 34825  | bb       | Unknown   |

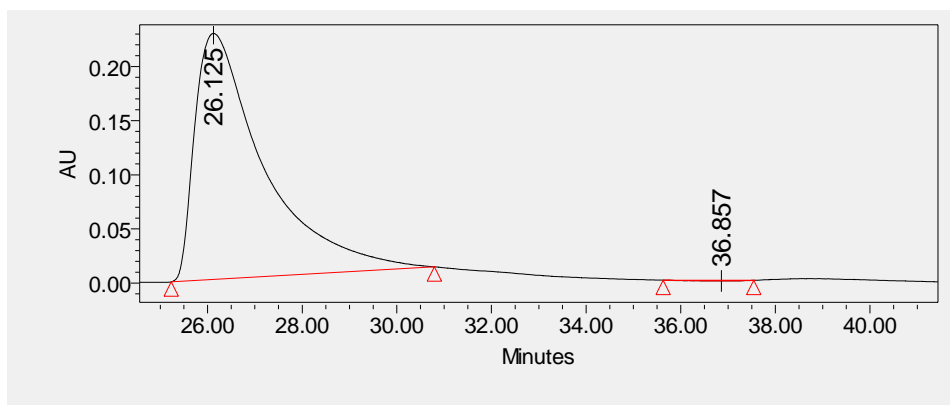

| Entry | Retention Time | Area     | Area (%) | Height | Int Type | Peak Type |
|-------|----------------|----------|----------|--------|----------|-----------|
| 1     | 26.125         | 23063370 | 99.80    | 227138 | bb       | Unknown   |
| 2     | 36.857         | 45760    | 0.20     | -655   | bb       | Unknown   |

**4n: (2*R*,4*S*,*E*)-ethyl 2-hydroxy-7-(hydroxyimino)-4-phenyl-2,3,4,5,6,7-hexahydro-cyclopenta[*b*]pyran-2-carboxylate**

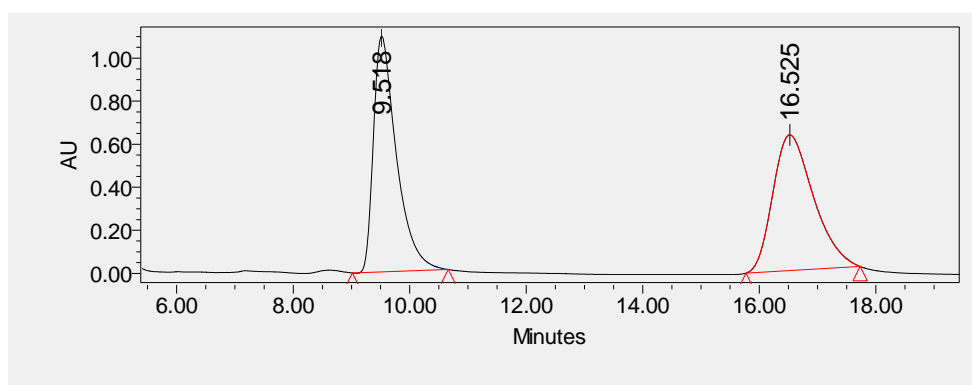

| Entry | Retention Time | Area     | Area (%) | Height  | Int Type | Peak Type |
|-------|----------------|----------|----------|---------|----------|-----------|
| 1     | 9.518          | 30010714 | 49.49    | 1095213 | bb       | Unknown   |
| 2     | 16.525         | 30627396 | 50.51    | 630396  | bb       | Unknown   |

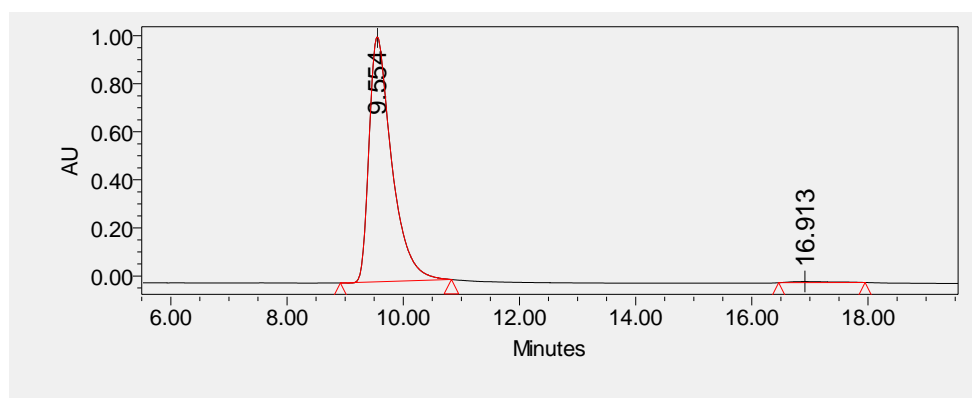

| Entry | Retention Time | Area     | Area (%) | Height  | Int Type | Peak Type |
|-------|----------------|----------|----------|---------|----------|-----------|
| 1     | 9.554          | 27592621 | 99.21    | 1018769 | bb       | Unknown   |
| 2     | 16.913         | 221000   | 0.79     | 4584    | bb       | Unknown   |

**4o: (2*R*,4*S*,*E*)-isopropyl 2-hydroxy-7-(hydroxyimino)-4-phenyl-2,3,4,5,6,7-hexahydrocyclopenta[*b*]pyran-2-carboxylate**

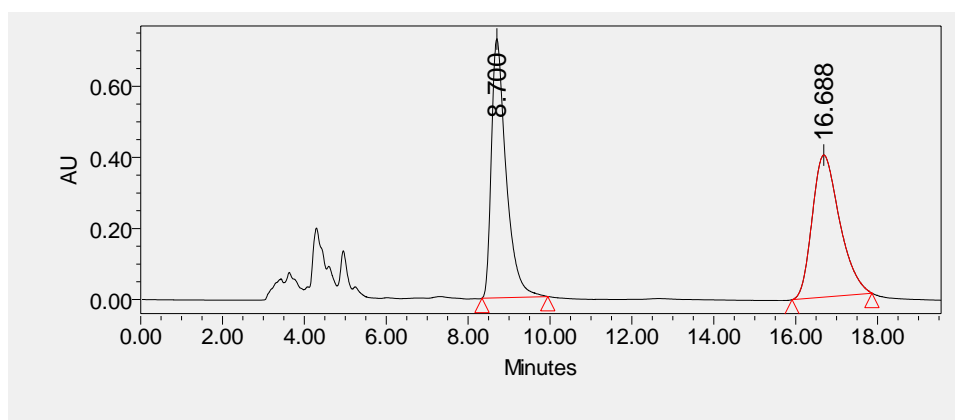

| Entry | Retention Time | Area     | Area (%) | Height | Int Type | Peak Type |
|-------|----------------|----------|----------|--------|----------|-----------|
| 1     | 8.700          | 18112666 | 49.32    | 728007 | bb       | Unknown   |
| 2     | 16.688         | 18611418 | 50.68    | 399604 | bb       | Unknown   |

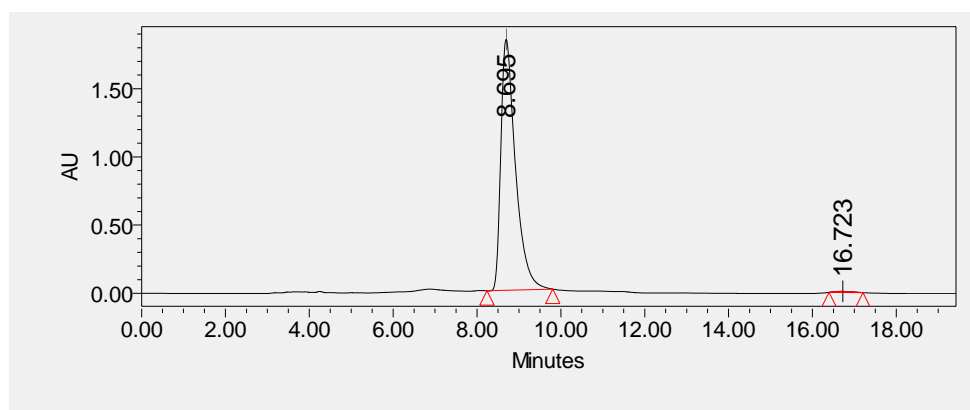

| Entry | Retention Time | Area     | Area (%) | Height  | Int Type | Peak Type |
|-------|----------------|----------|----------|---------|----------|-----------|
| 1     | 8.695          | 44387200 | 99.48    | 1838861 | bb       | Unknown   |
| 2     | 16.723         | 230581   | 0.52     | 7936    | bb       | Unknown   |

**4p: (2*R*,4*S*,*E*)-benzyl 4-(3-fluorophenyl)-2-hydroxy-7-(hydroxyimino)-2,3,4,5,6,7-hexahydrocyclopenta[*b*]pyran-2-carboxylate**

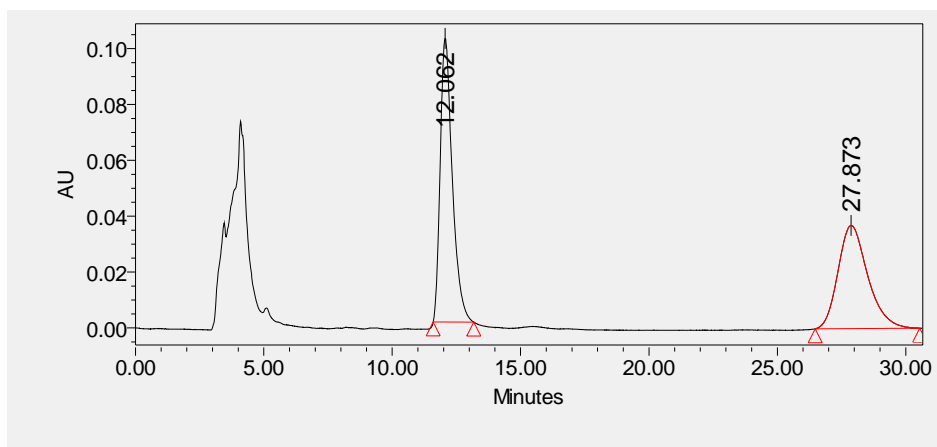

| Entry | Retention Time | Area    | Area (%) | Height | Int Type | Peak Type |
|-------|----------------|---------|----------|--------|----------|-----------|
| 1     | 12.062         | 3319305 | 52.85    | 101558 | bb       | Unknown   |
| 2     | 27.873         | 2960890 | 47.15    | 36906  | bb       | Unknown   |

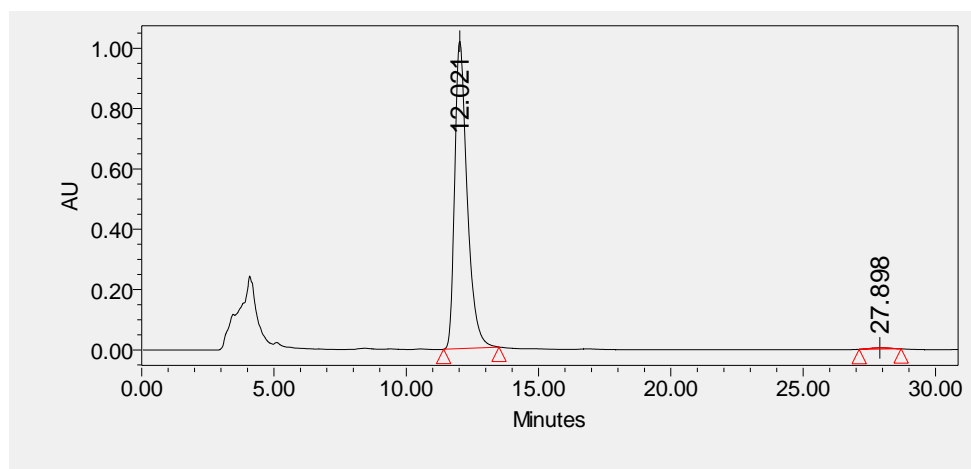

| Entry | Retention Time | Area     | Area (%) | Height  | Int Type | Peak Type |
|-------|----------------|----------|----------|---------|----------|-----------|
| 1     | 12.021         | 33284421 | 99.29    | 1019062 | bb       | Unknown   |
| 2     | 27.898         | 238905   | 0.71     | 4386    | bb       | Unknown   |

**4q: (2R,4S,E)-methyl 2-hydroxy-8-(hydroxyimino)-4-phenyl-3,4,5,6,7,8-hexahydro-2H-chromene-2-carboxylate**

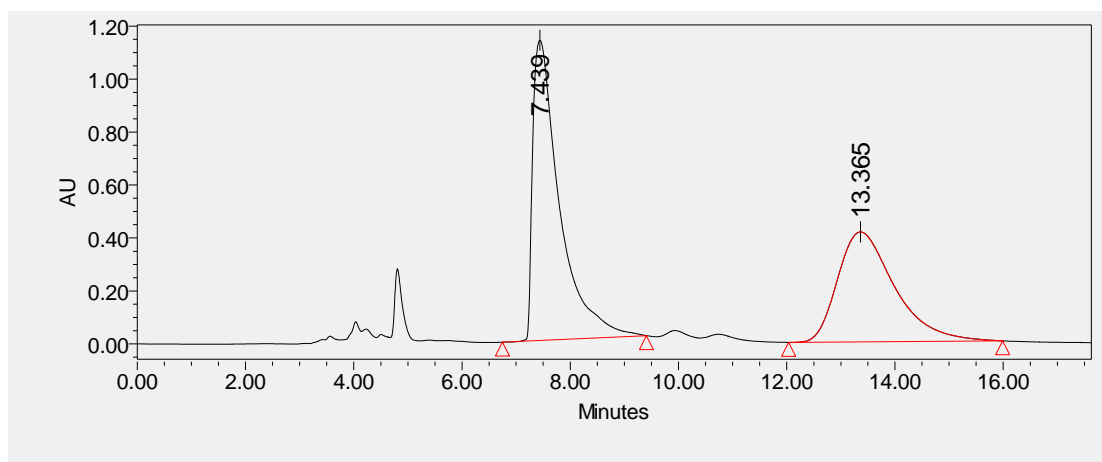

| Entry | Retention Time | Area     | Area (%) | Height  | Int Type | Peak Type |
|-------|----------------|----------|----------|---------|----------|-----------|
| 1     | 7.439          | 39030246 | 56.33    | 1133680 | bb       | Unknown   |
| 2     | 13.365         | 30260847 | 43.67    | 415243  | bb       | Unknown   |

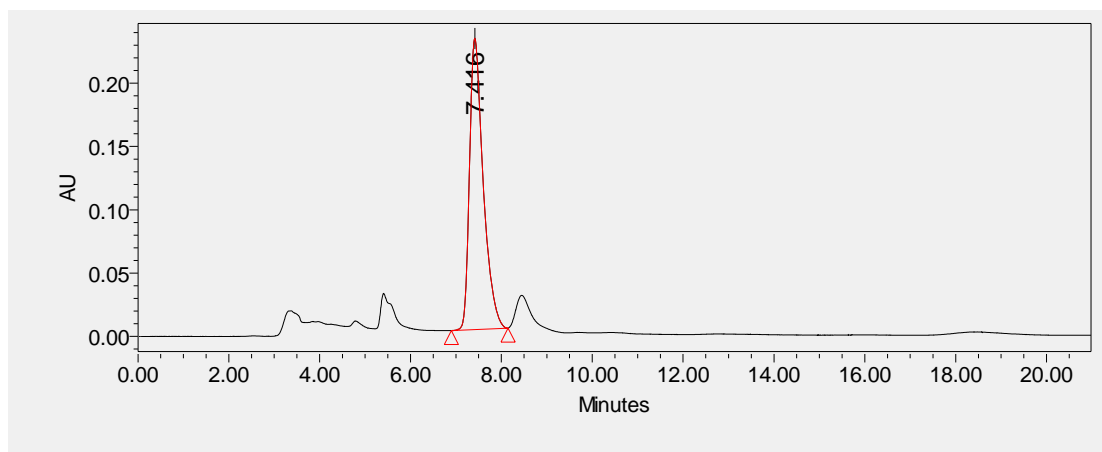

| Entry | Retention Time | Area    | Area (%) | Height | Int Type | Peak Type |
|-------|----------------|---------|----------|--------|----------|-----------|
| 1     | 7.416          | 4799397 | 100.00   | 229860 | bb       | Unknown   |

### 8.0 Copies of NMR Spectra of Products

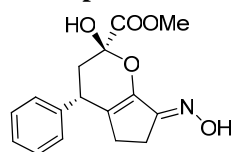

4a

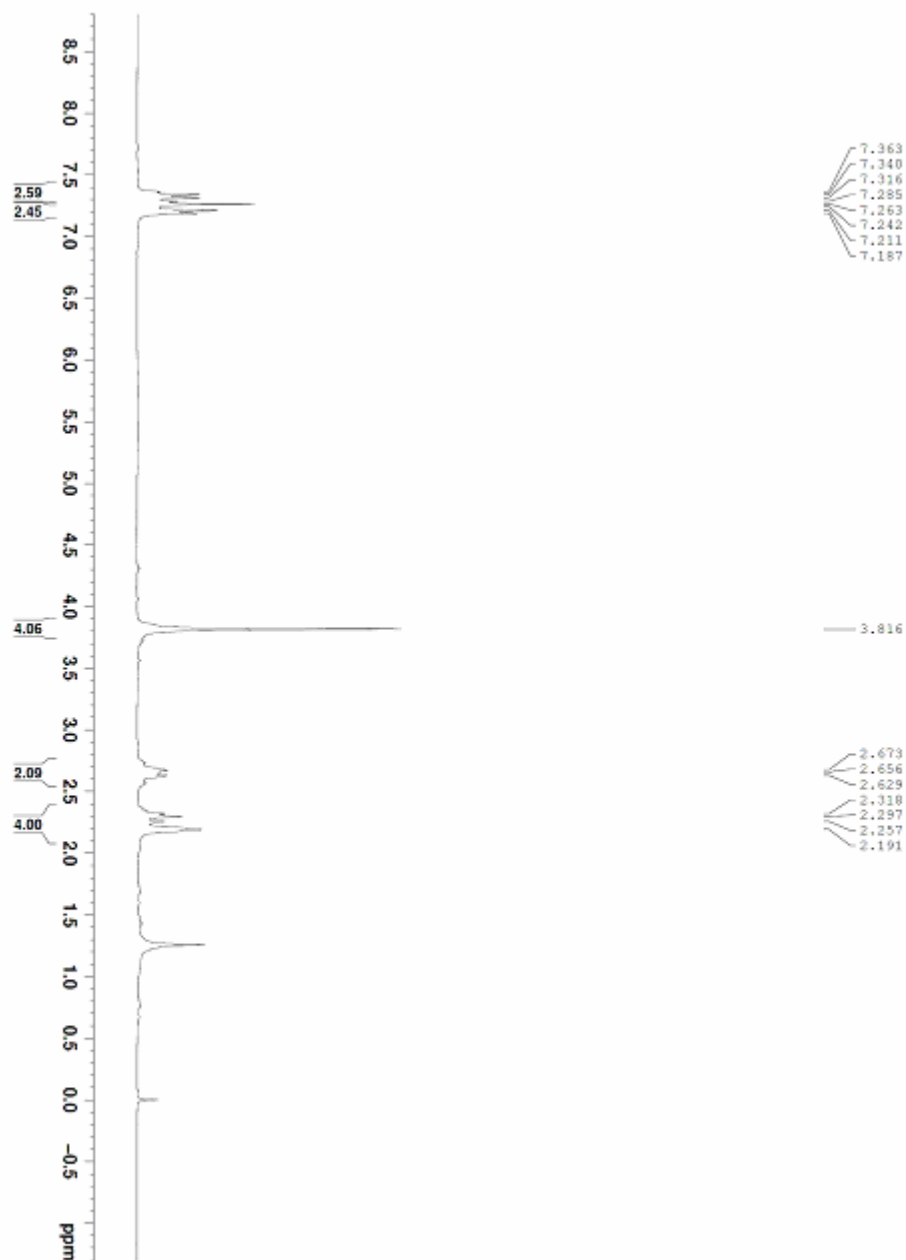

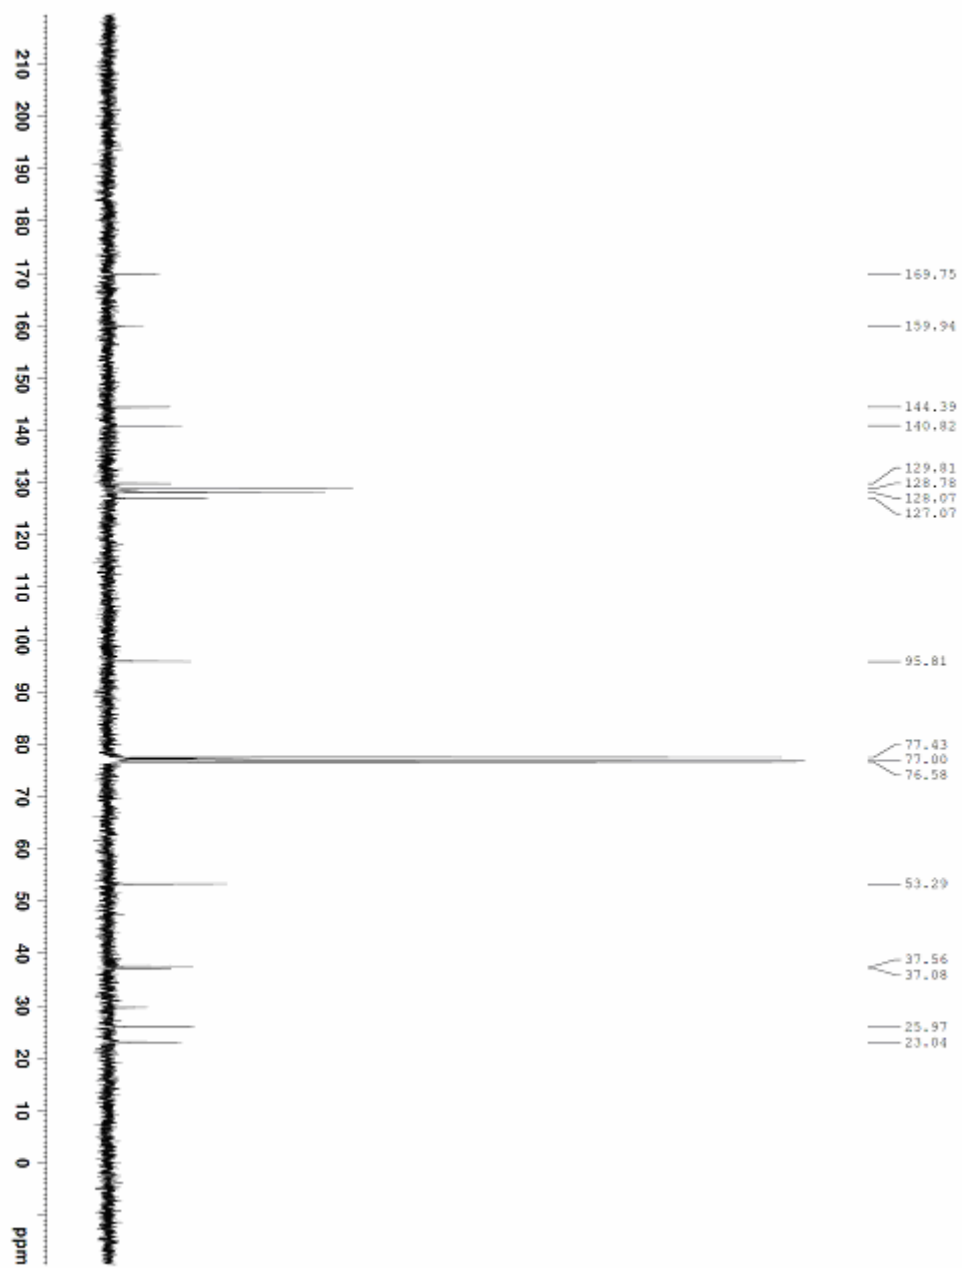

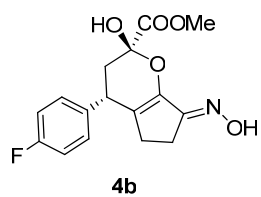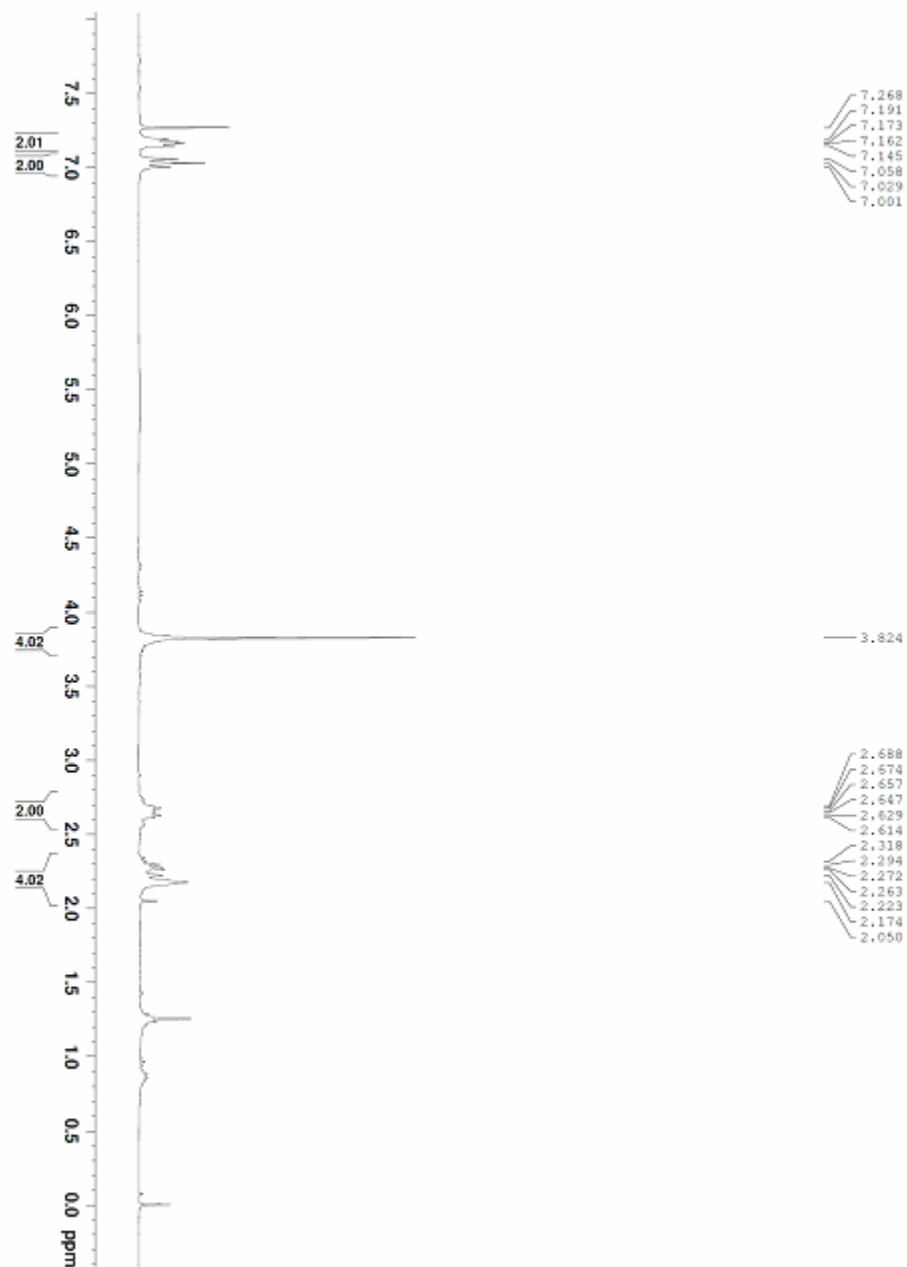



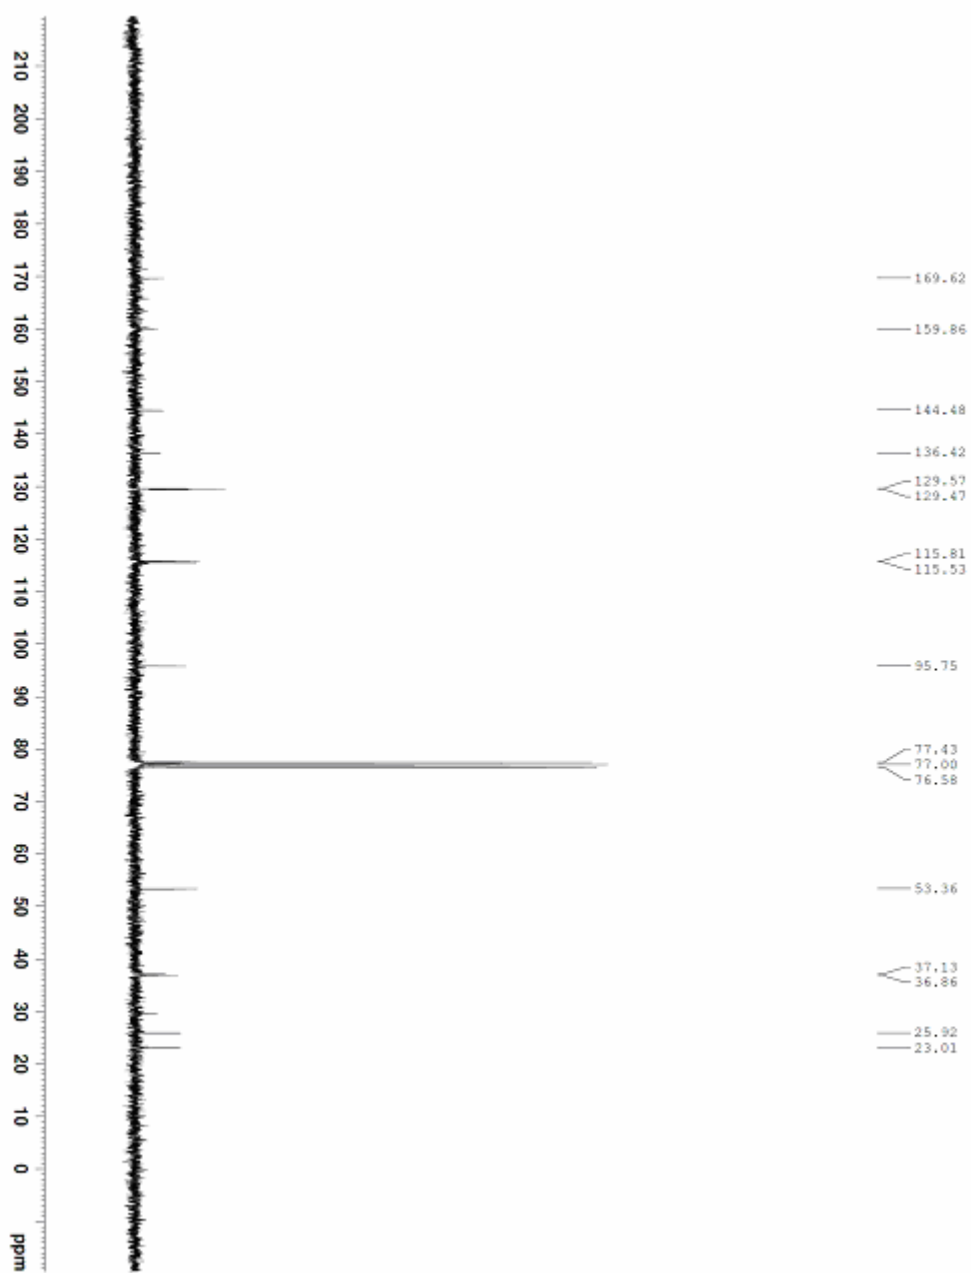

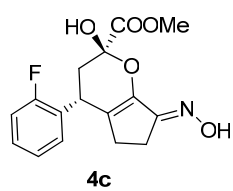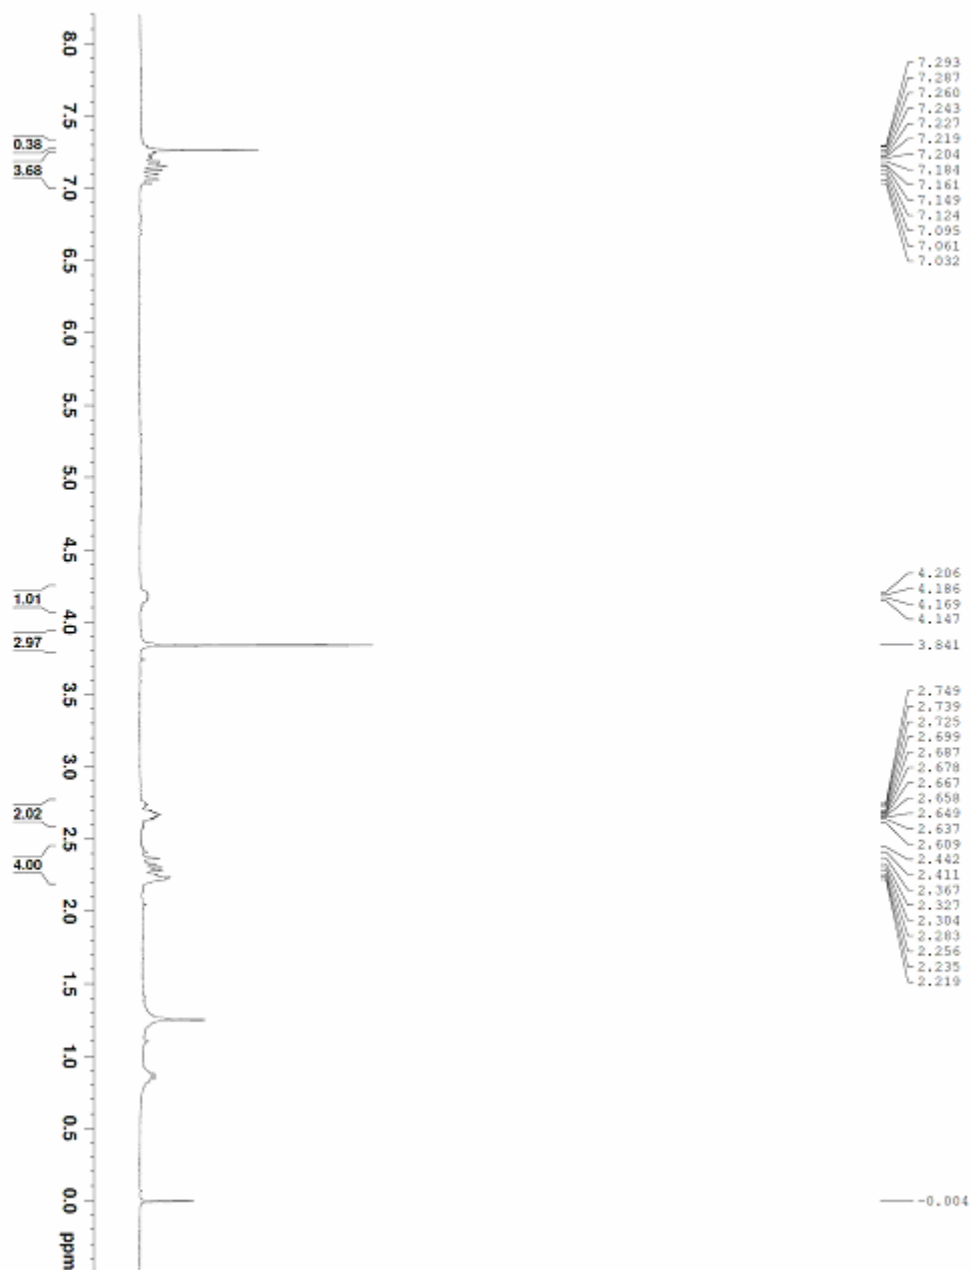

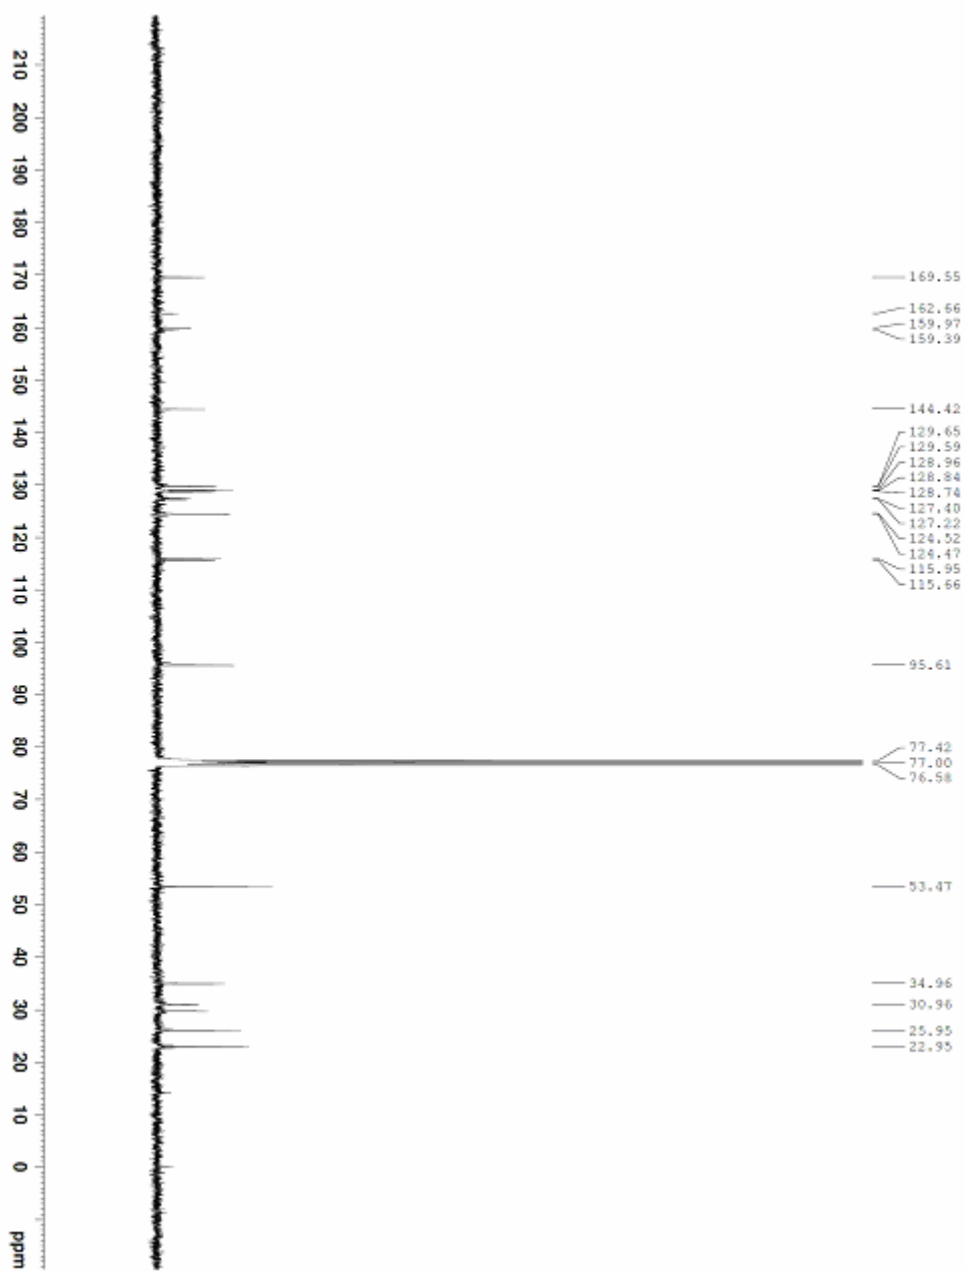

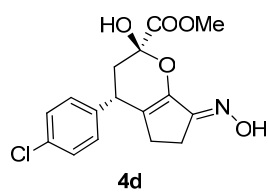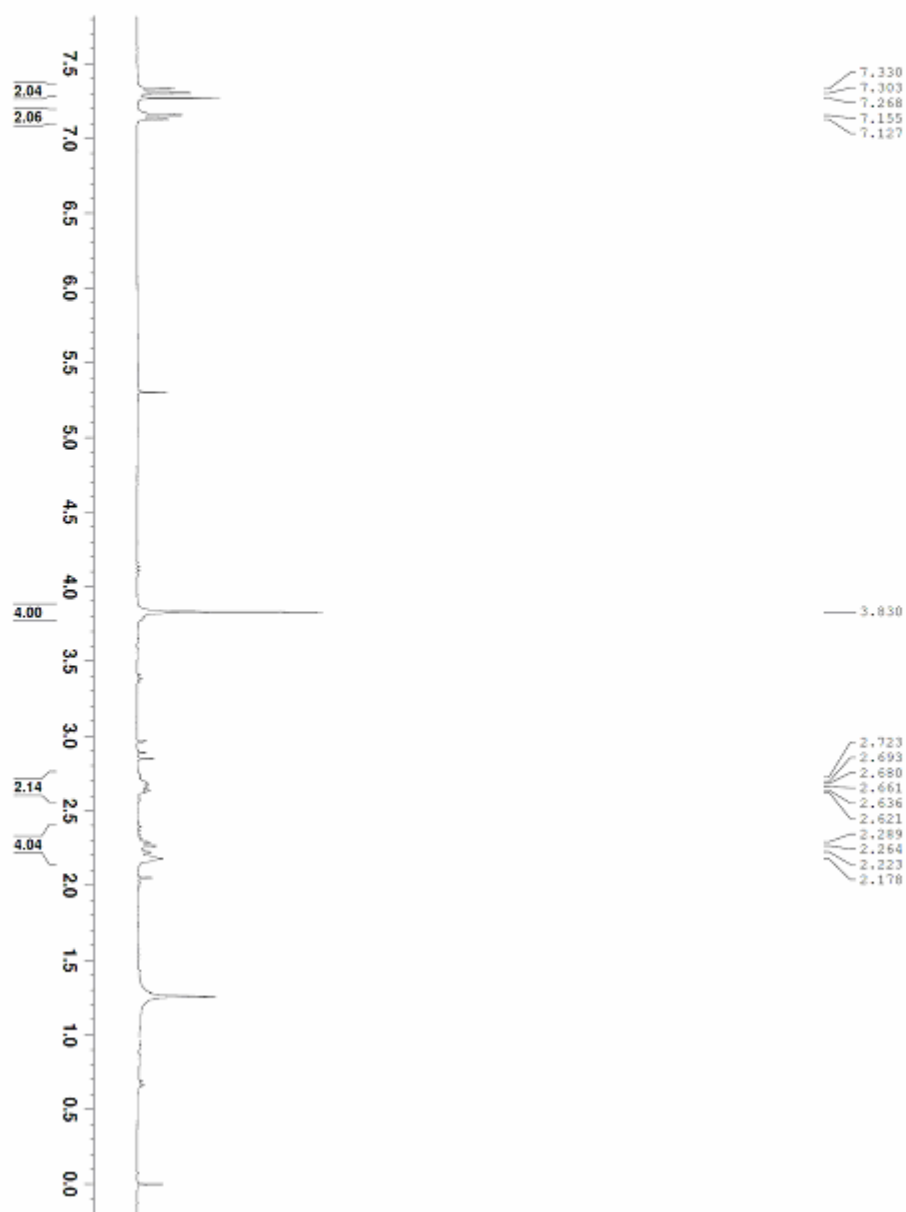

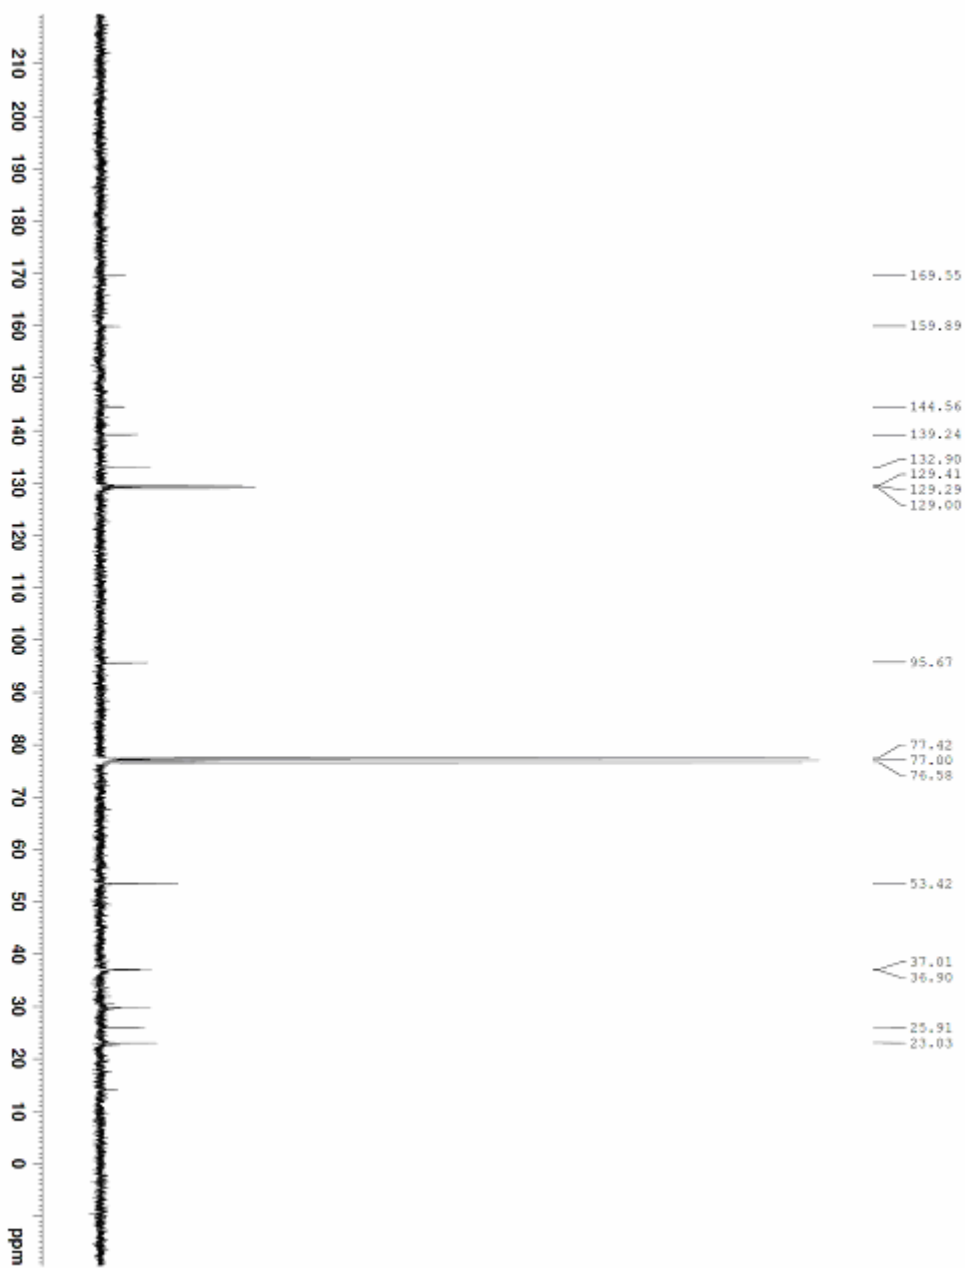

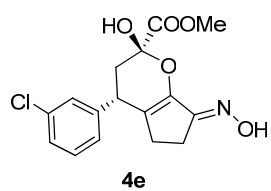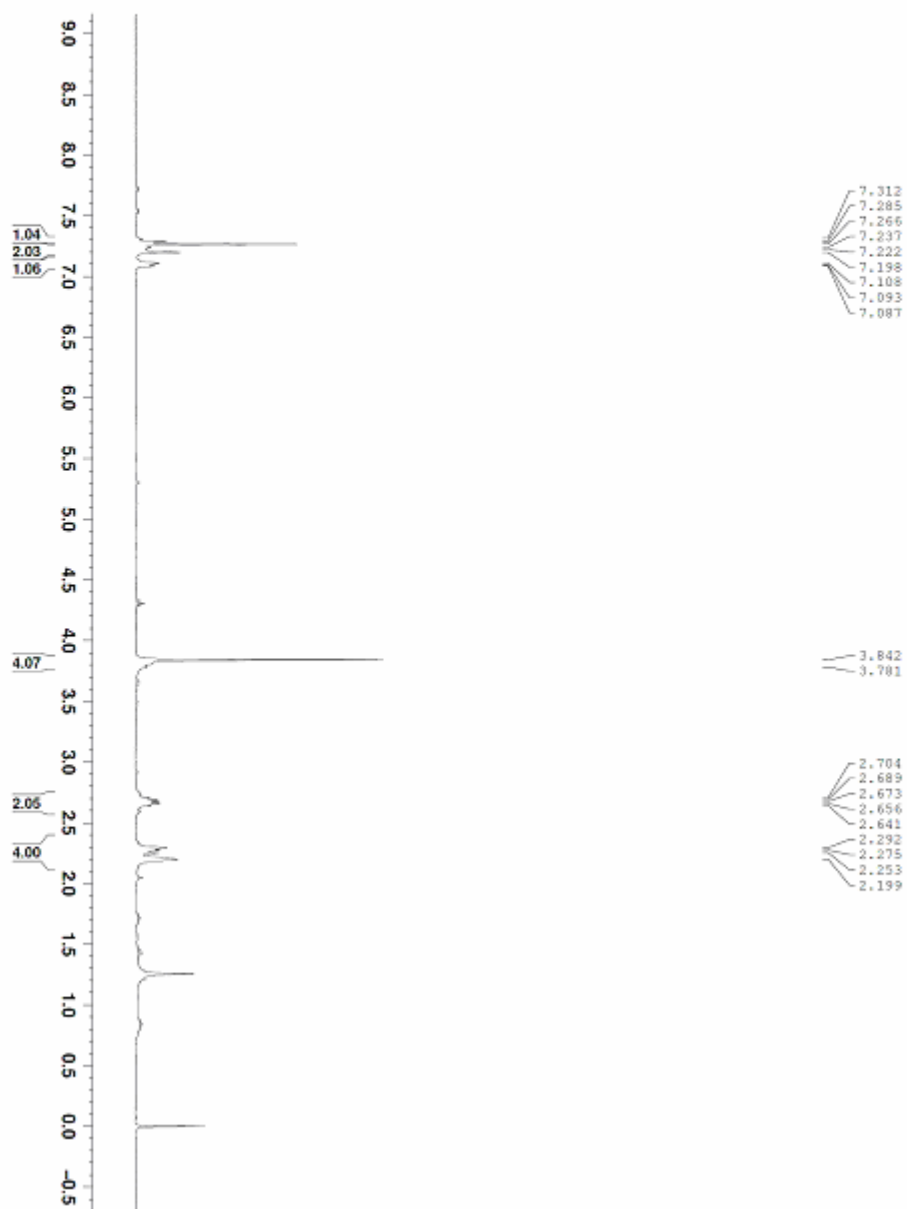

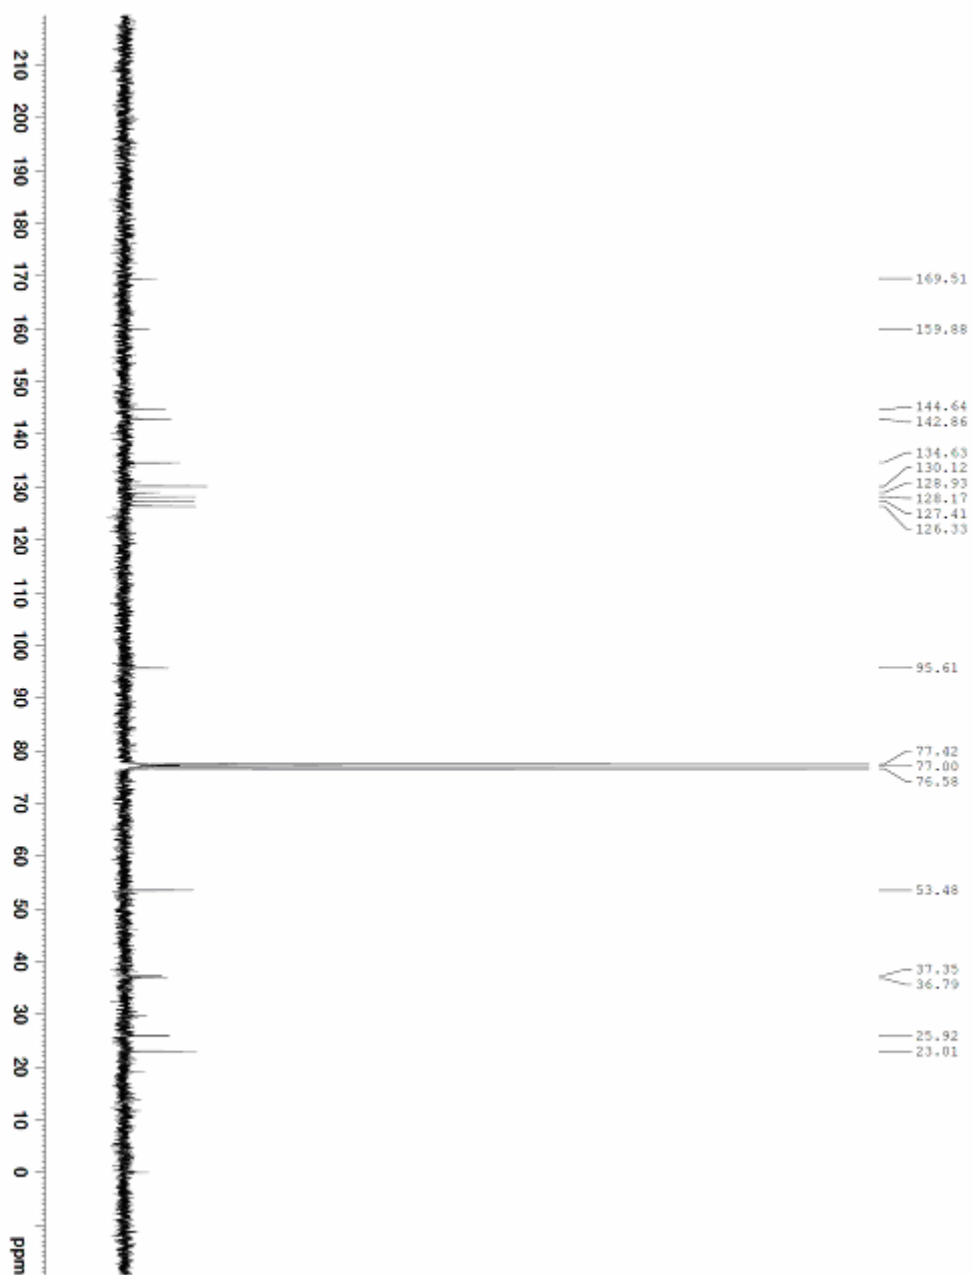

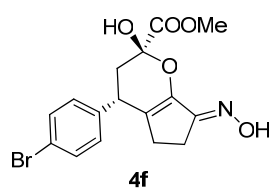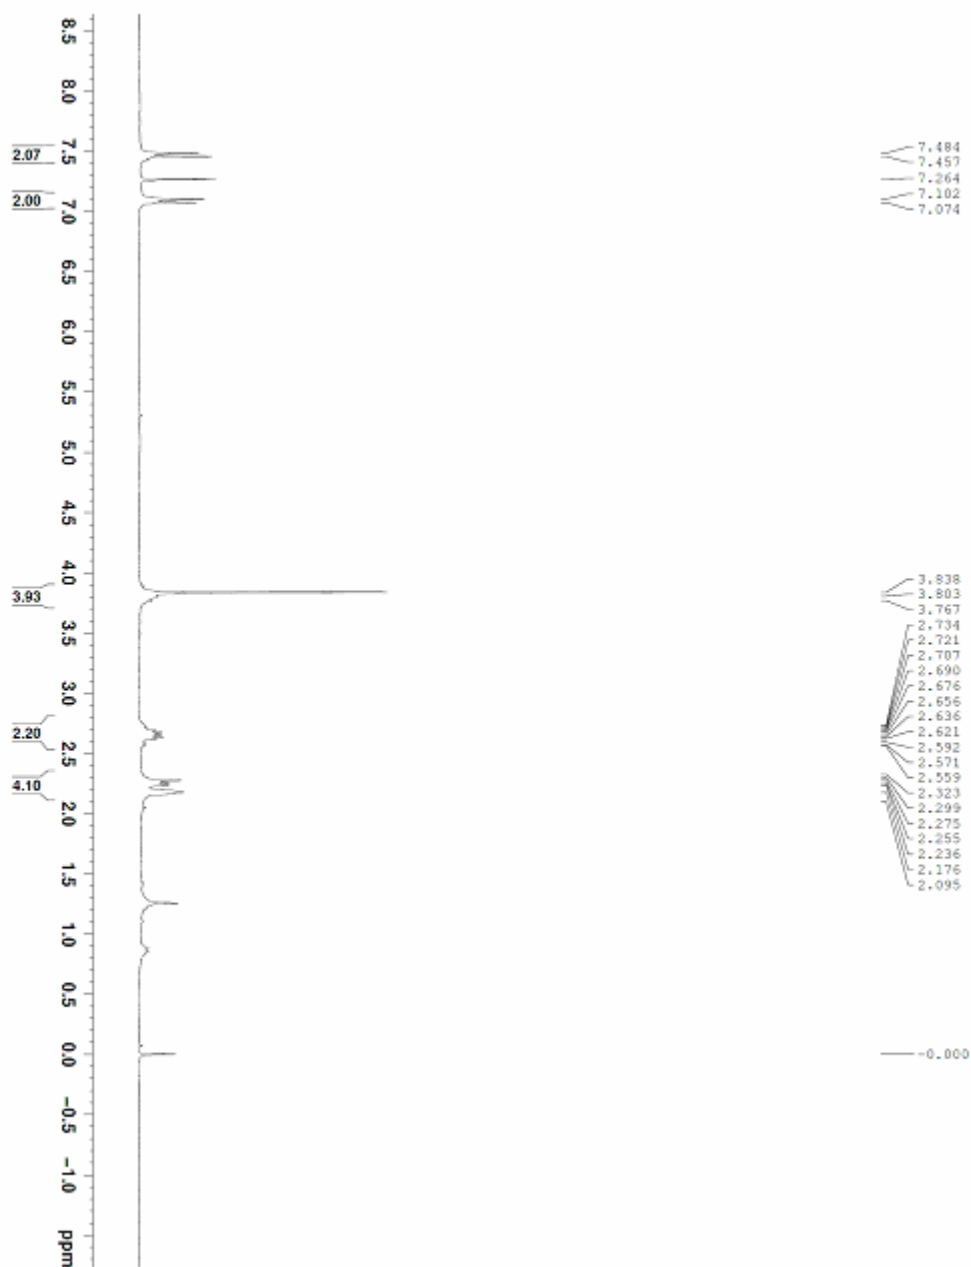



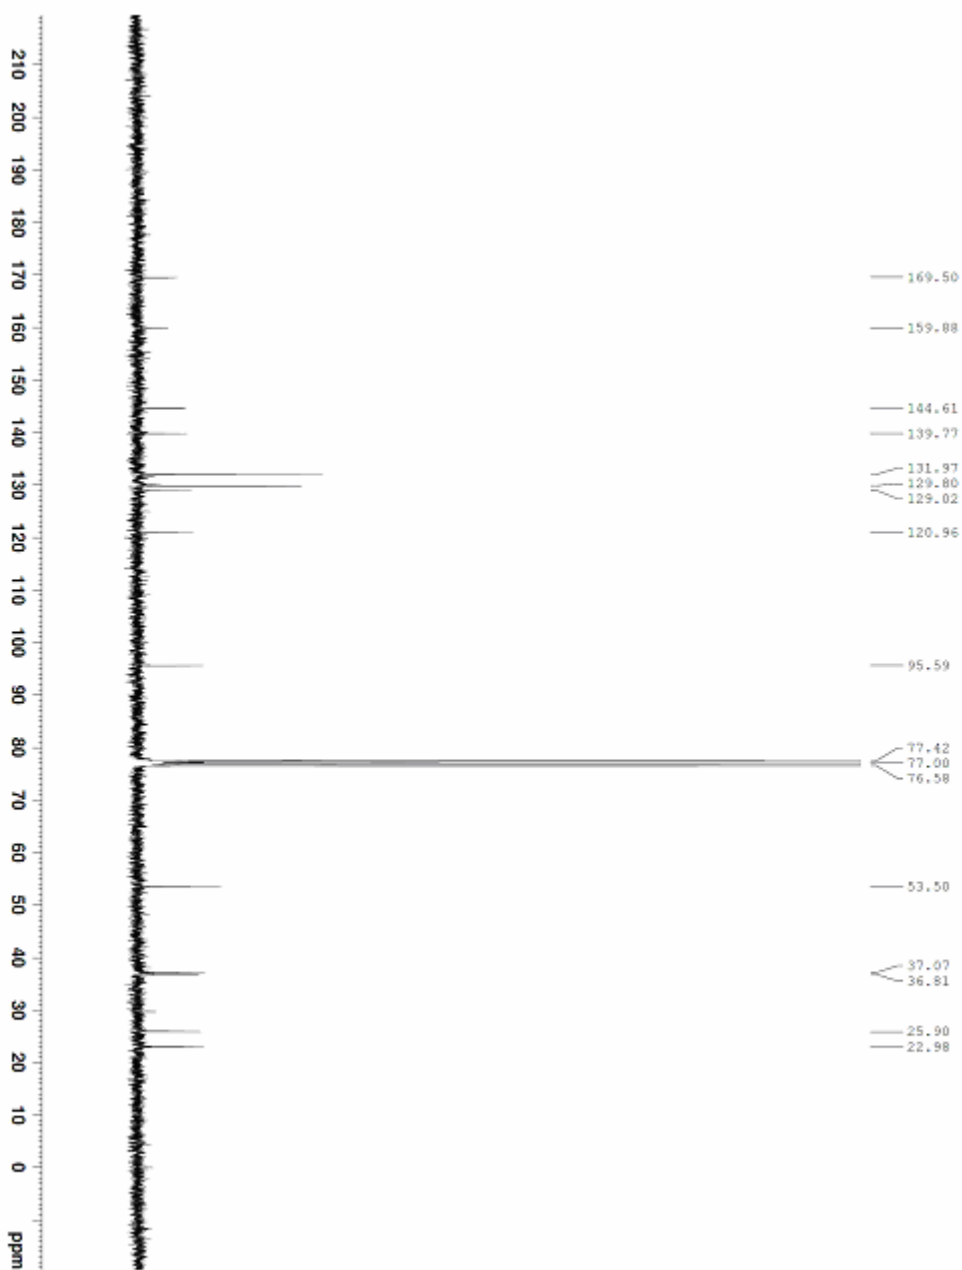

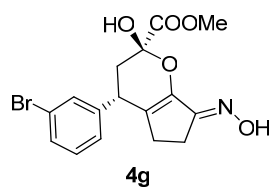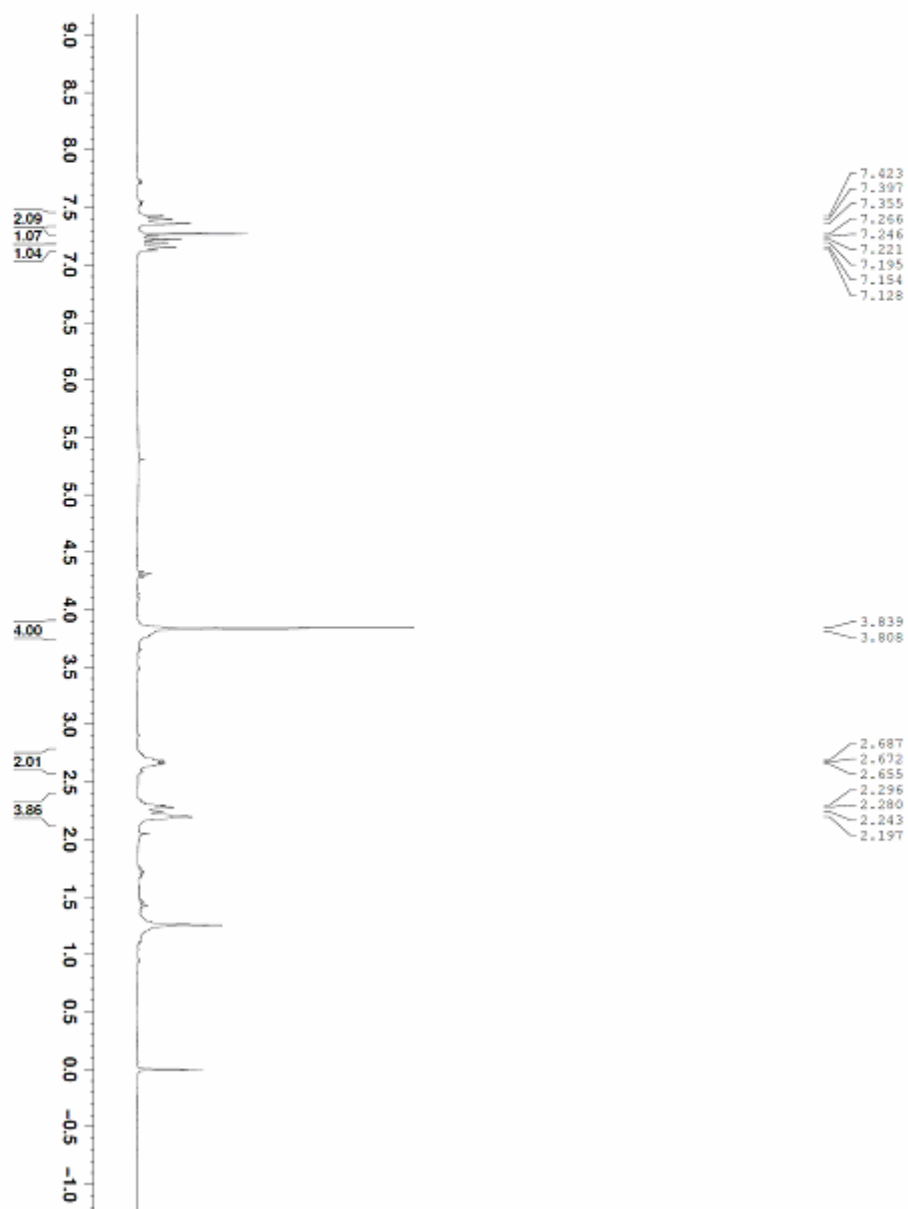

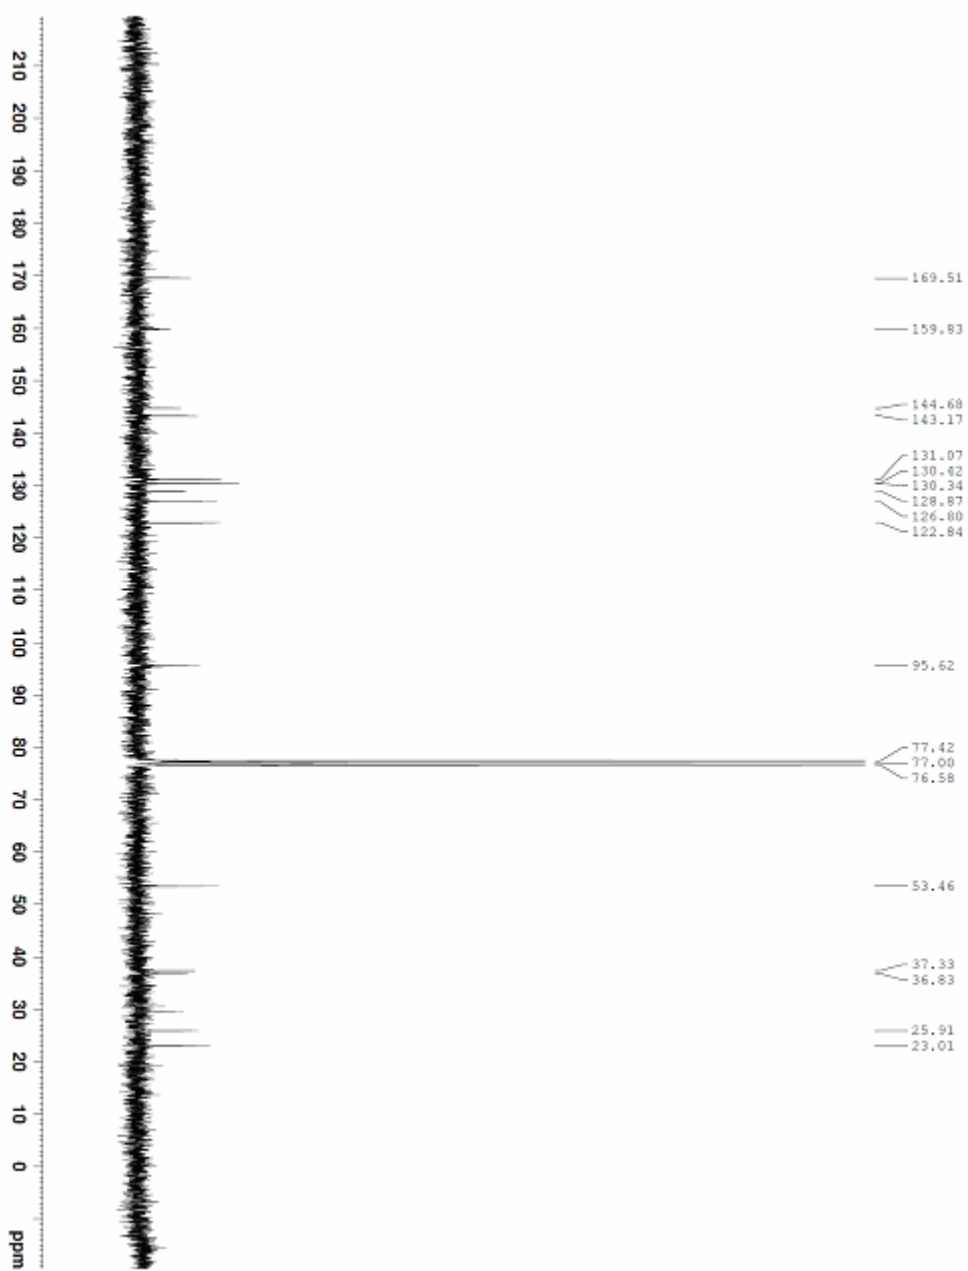

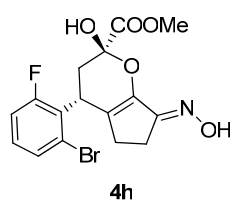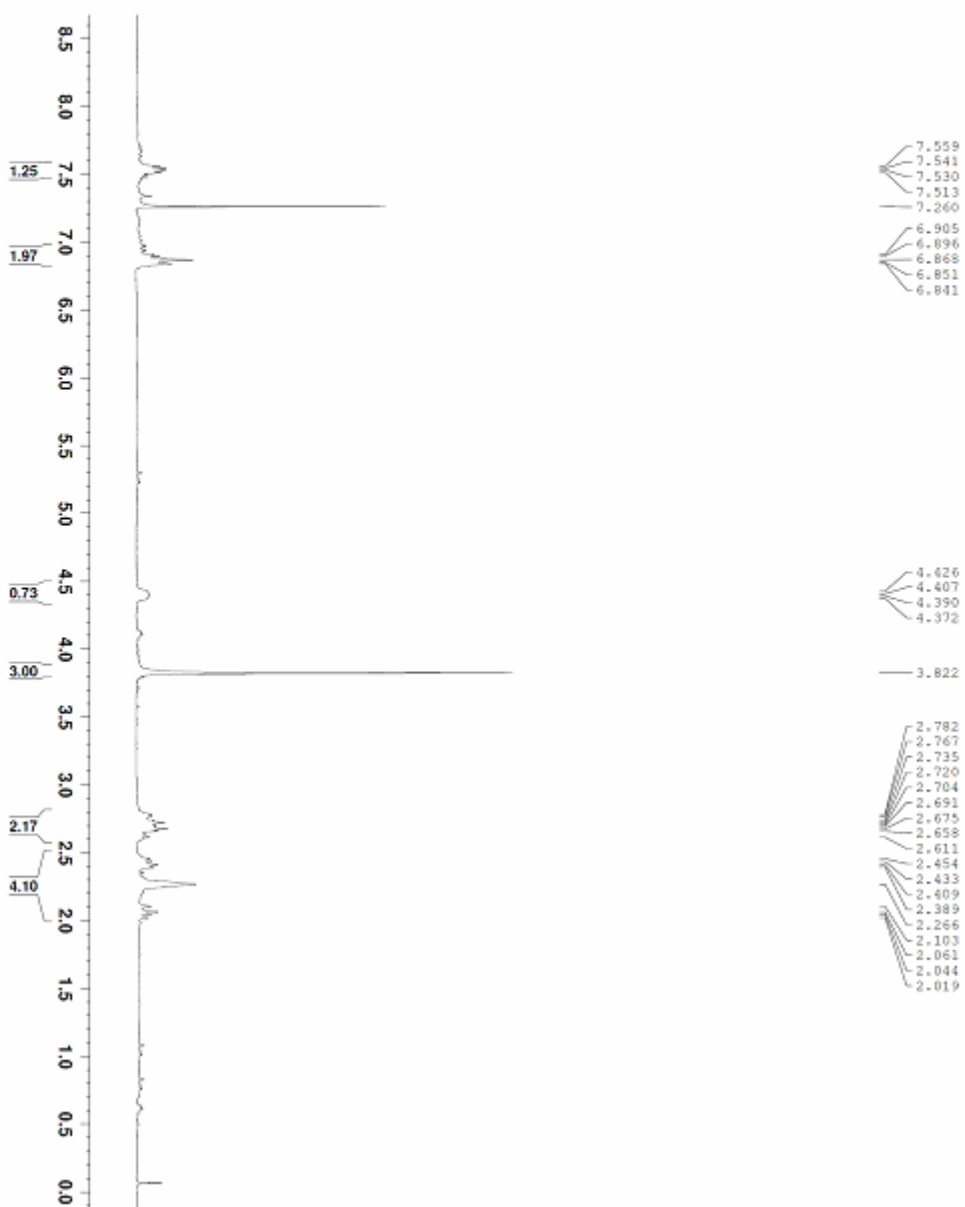

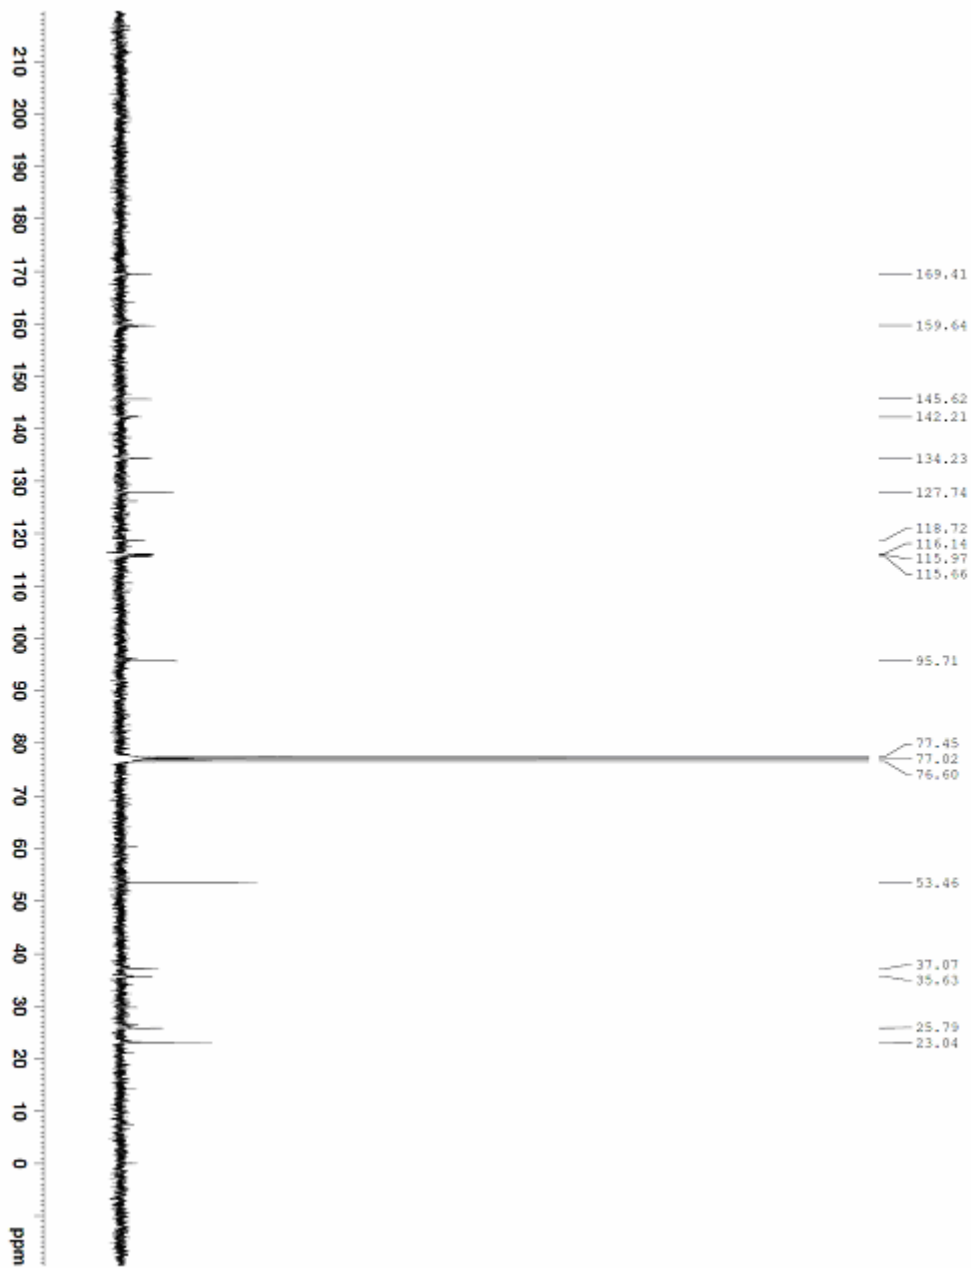

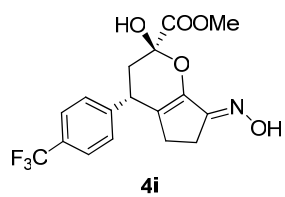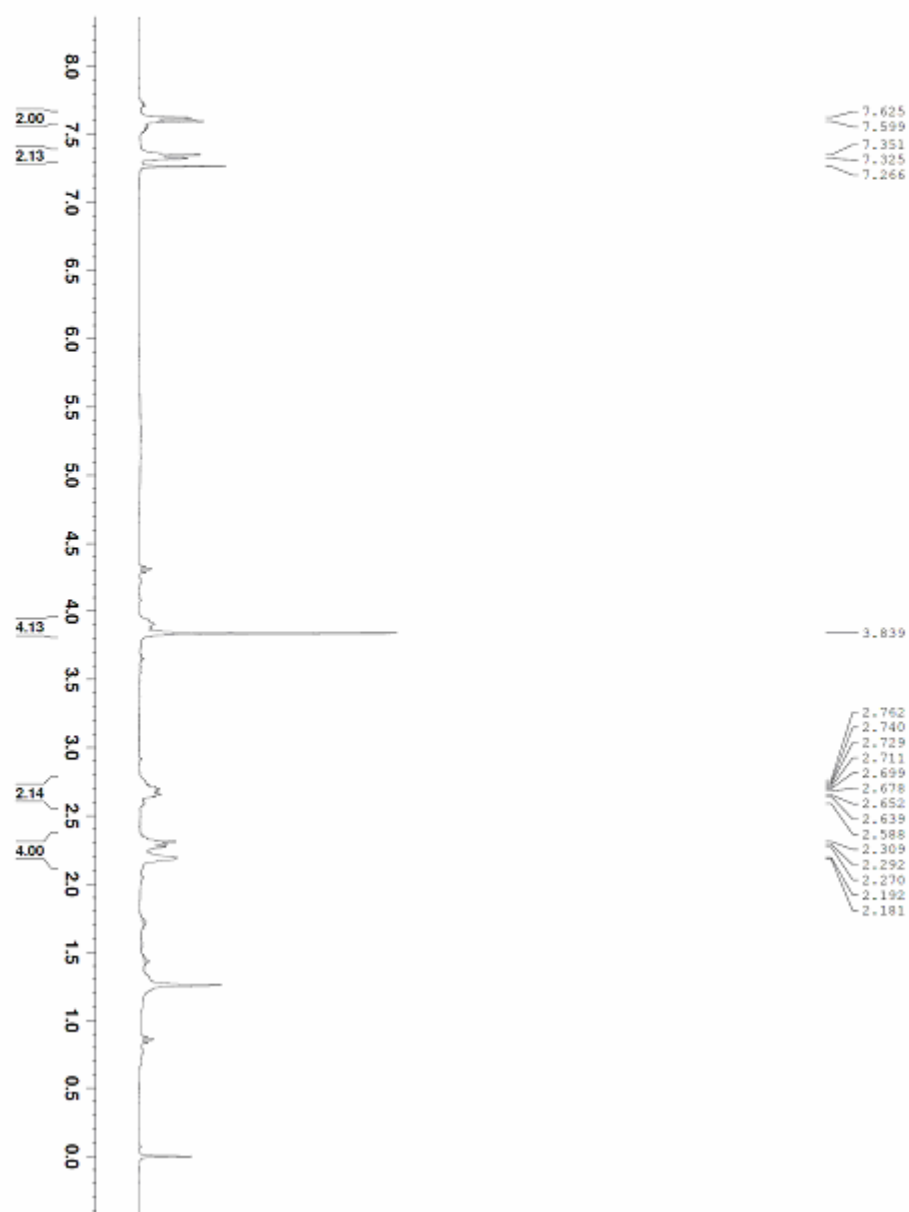

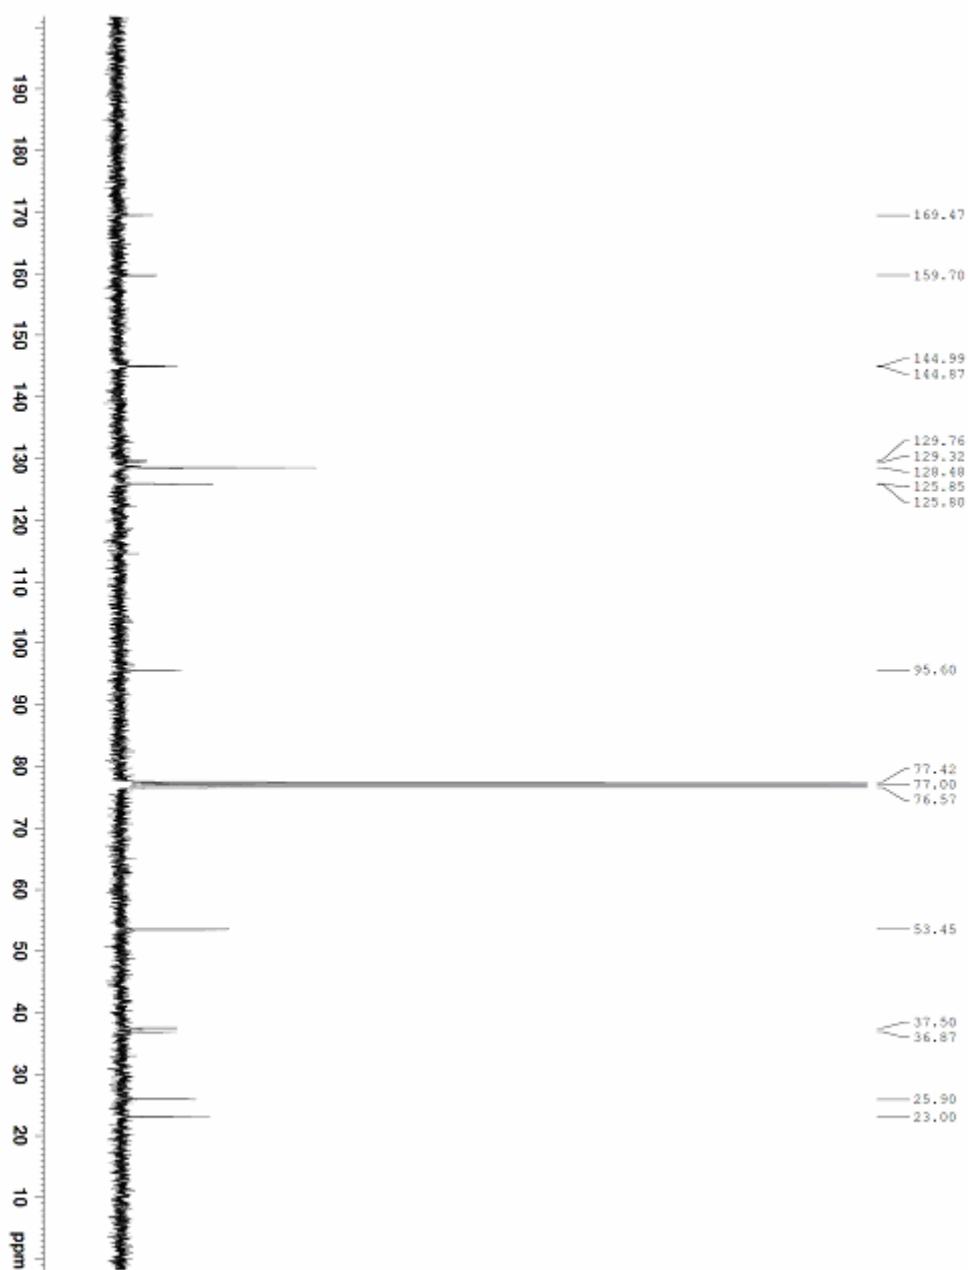

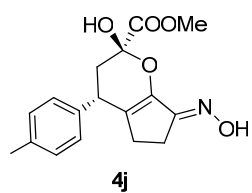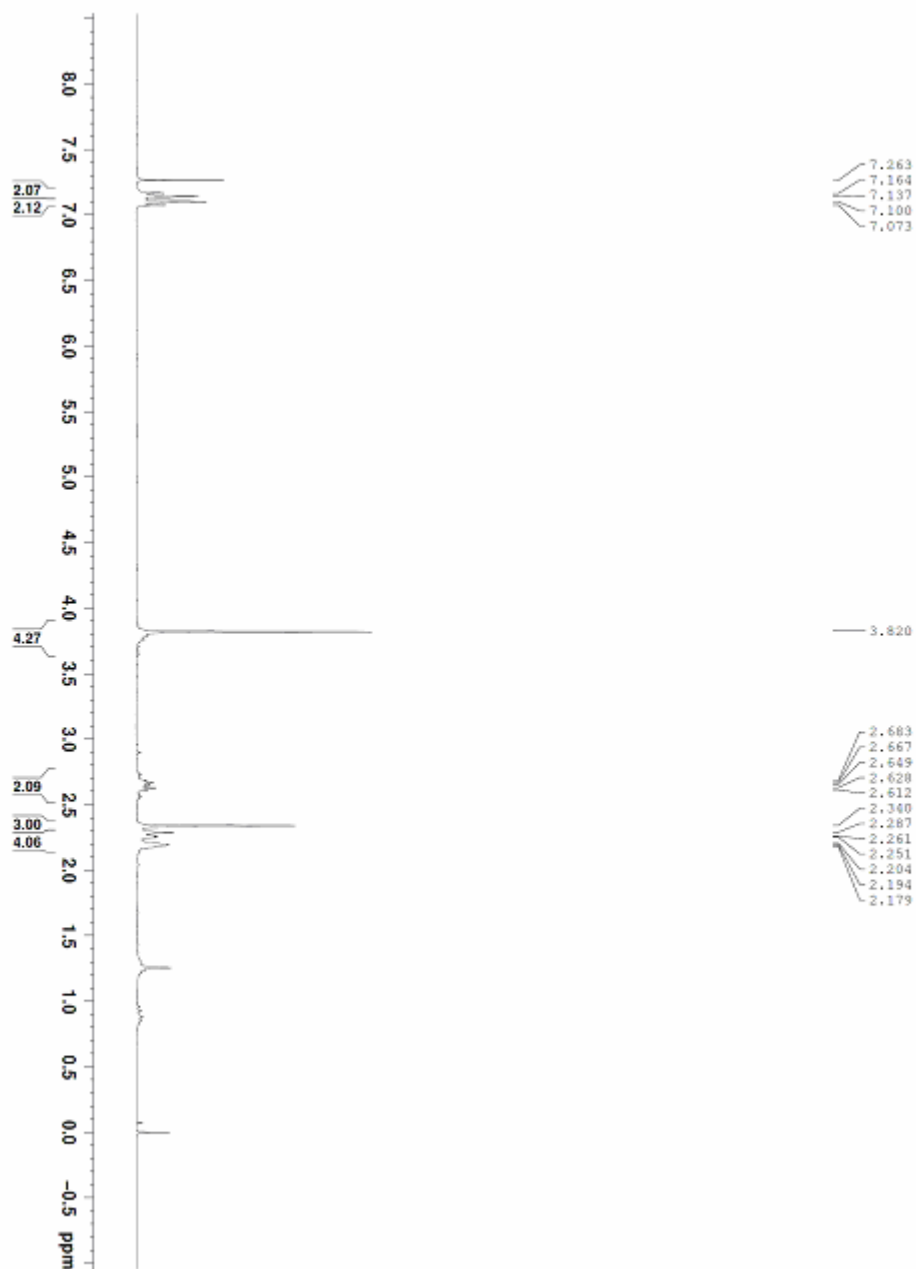



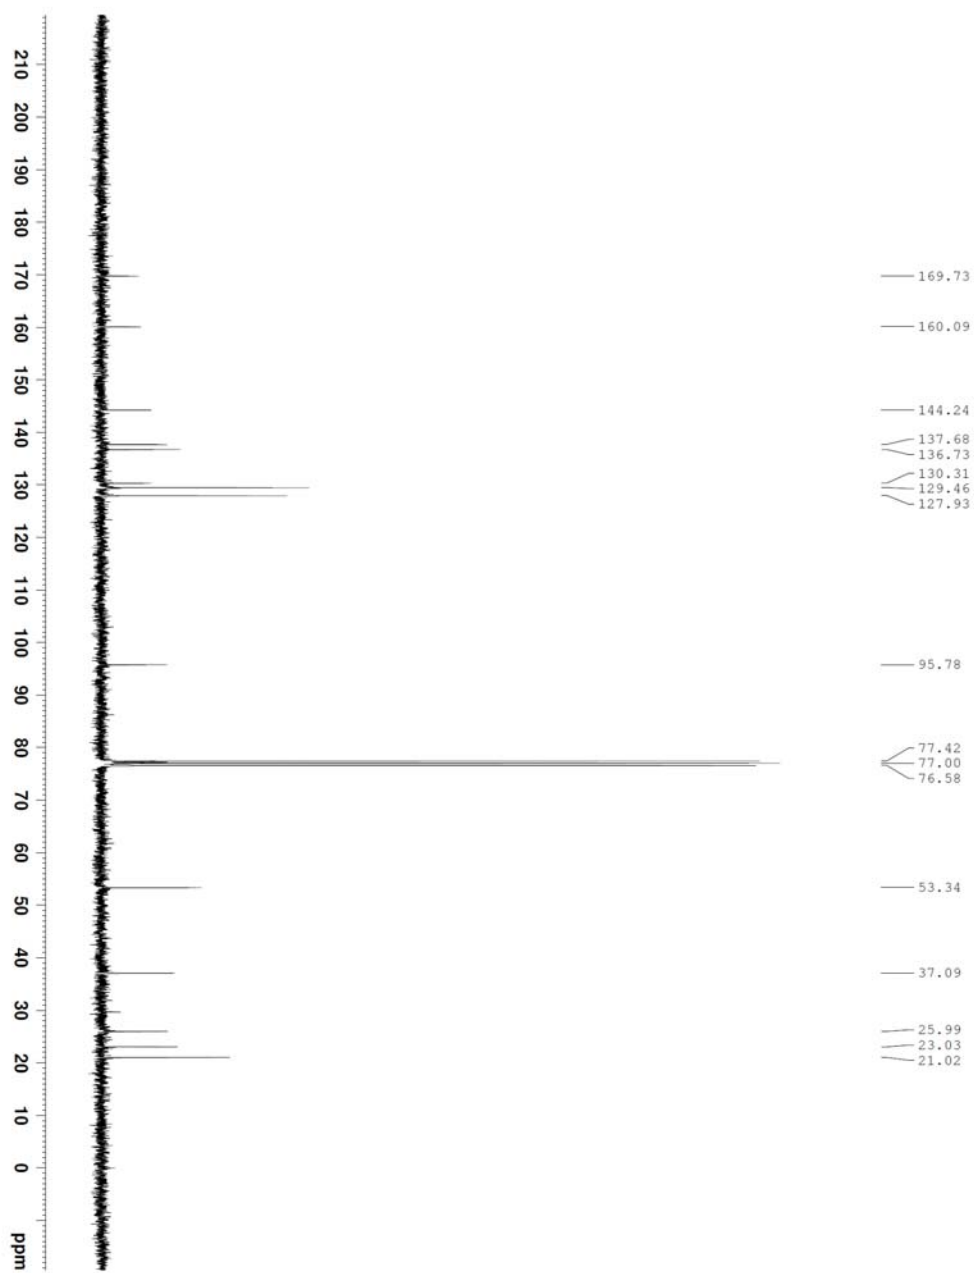

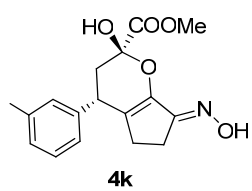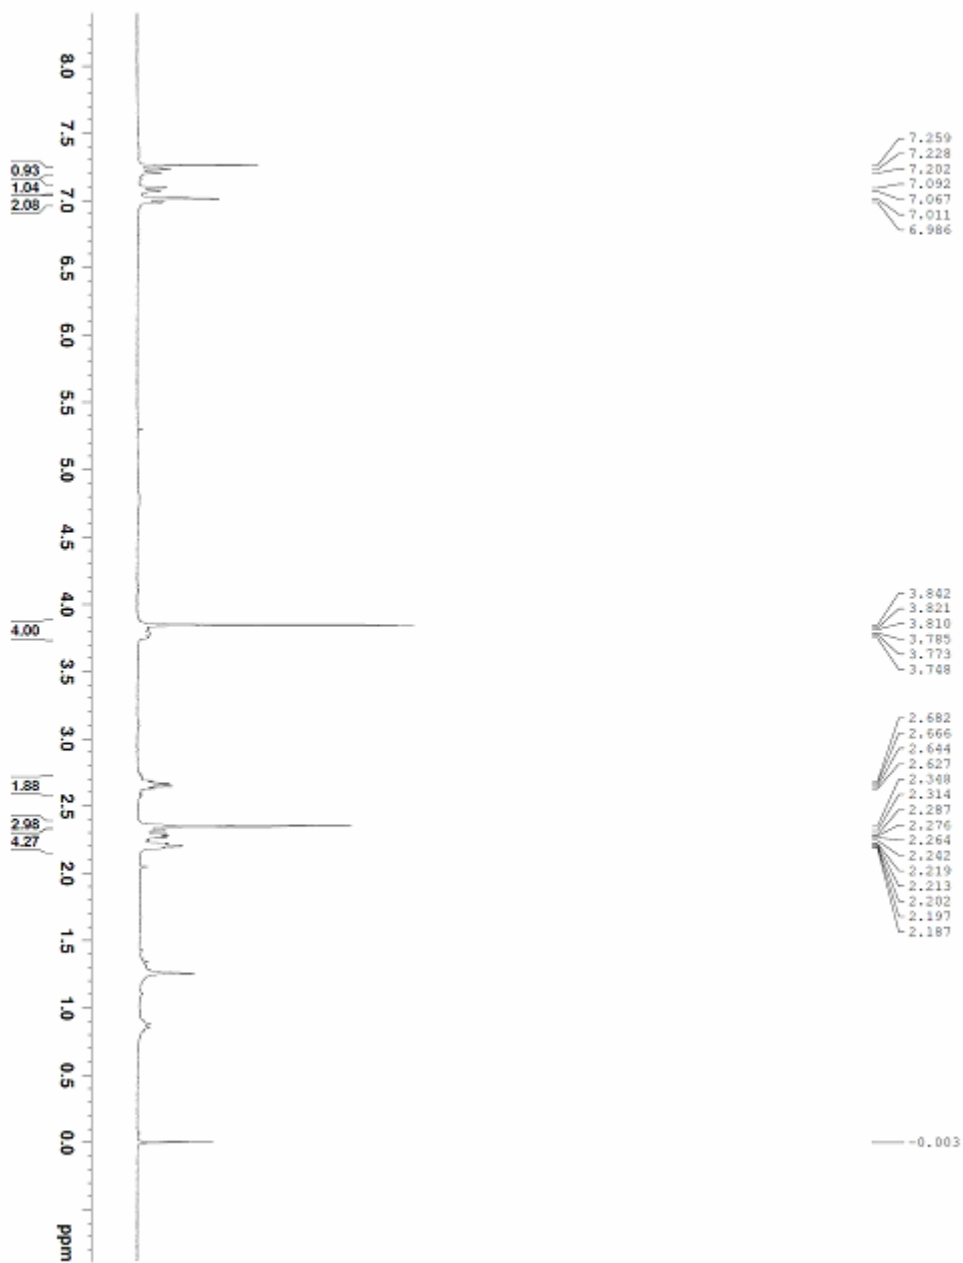

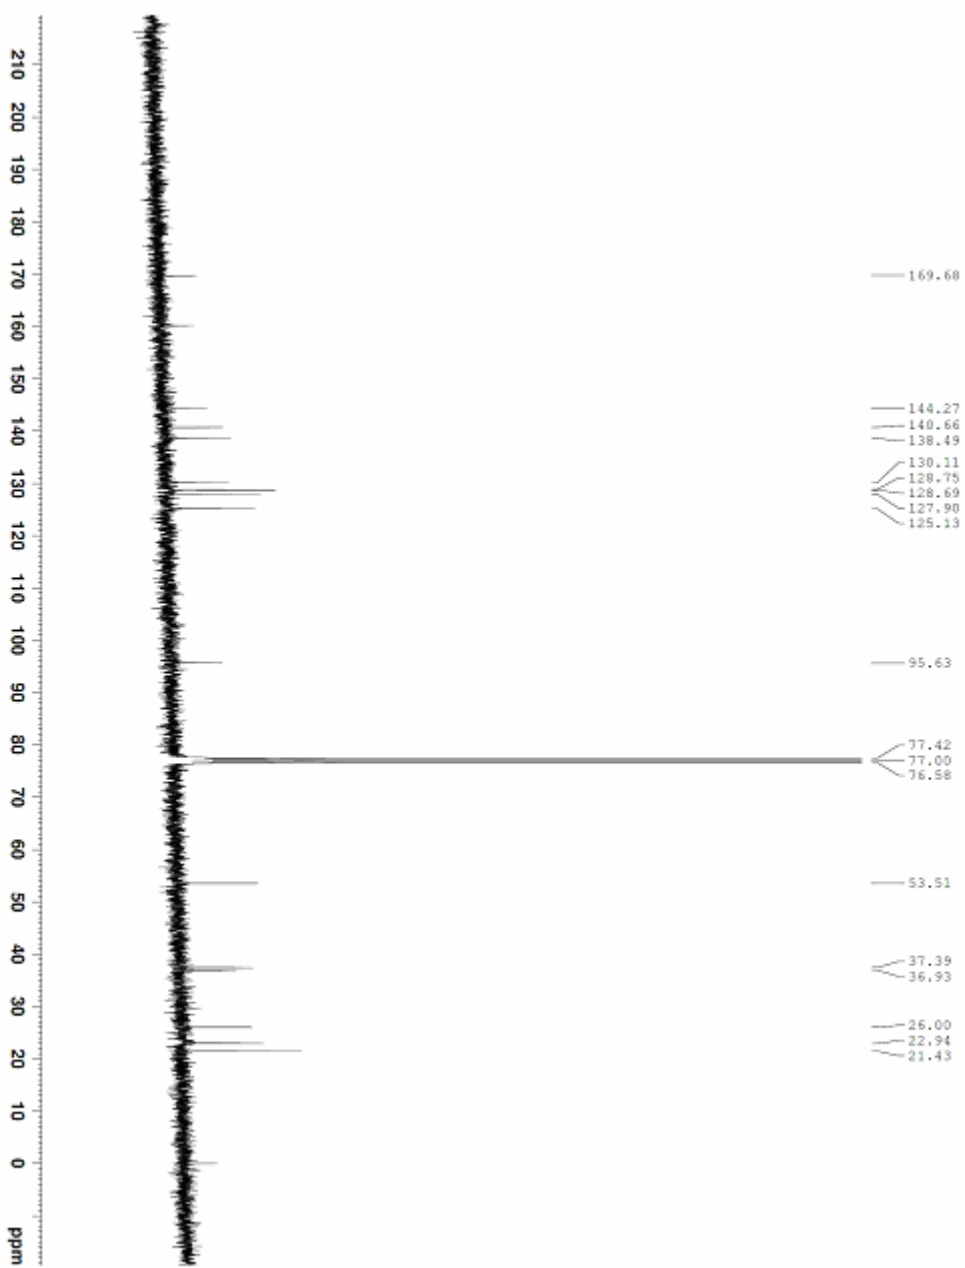

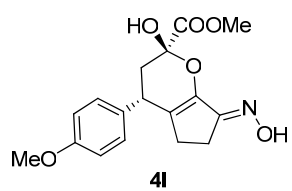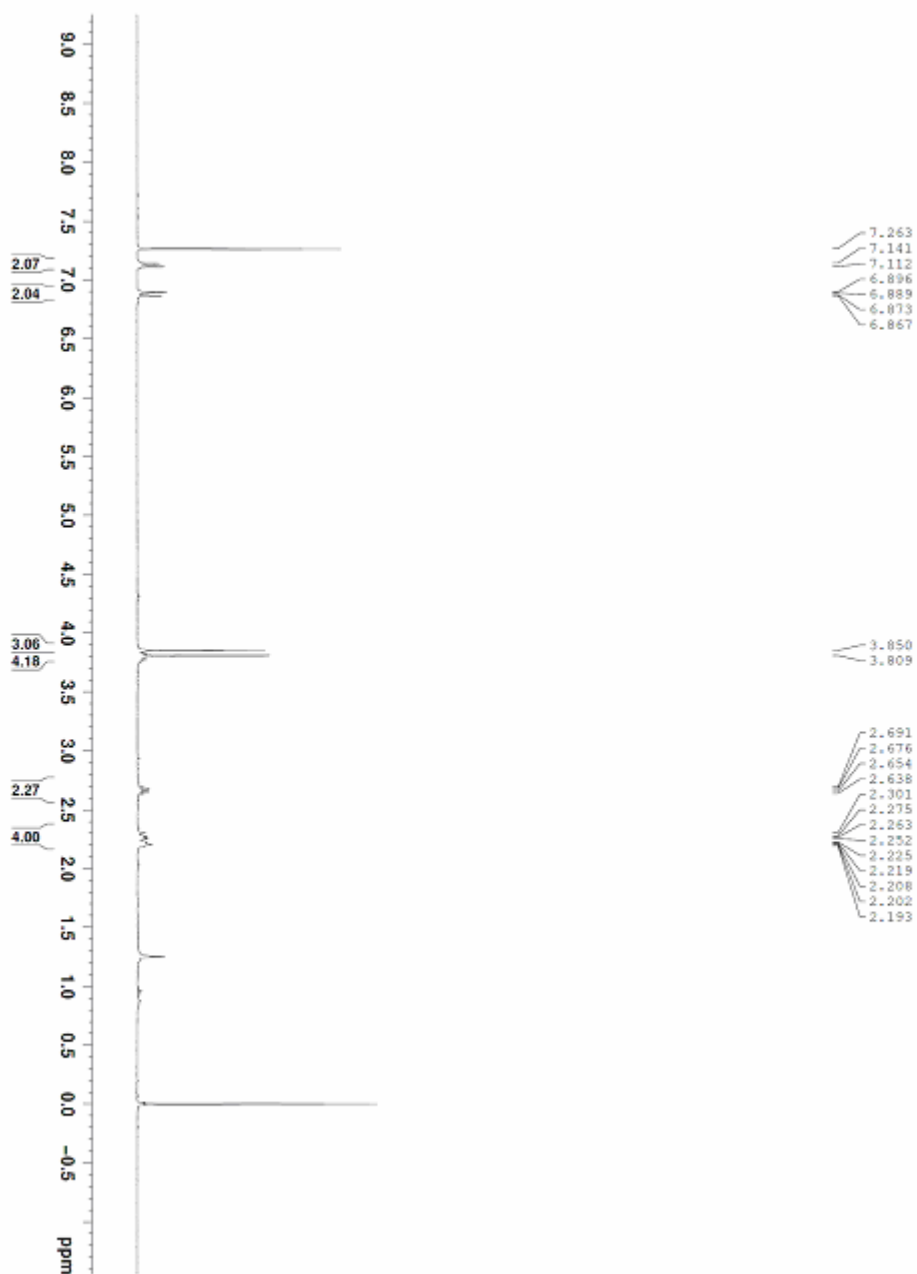

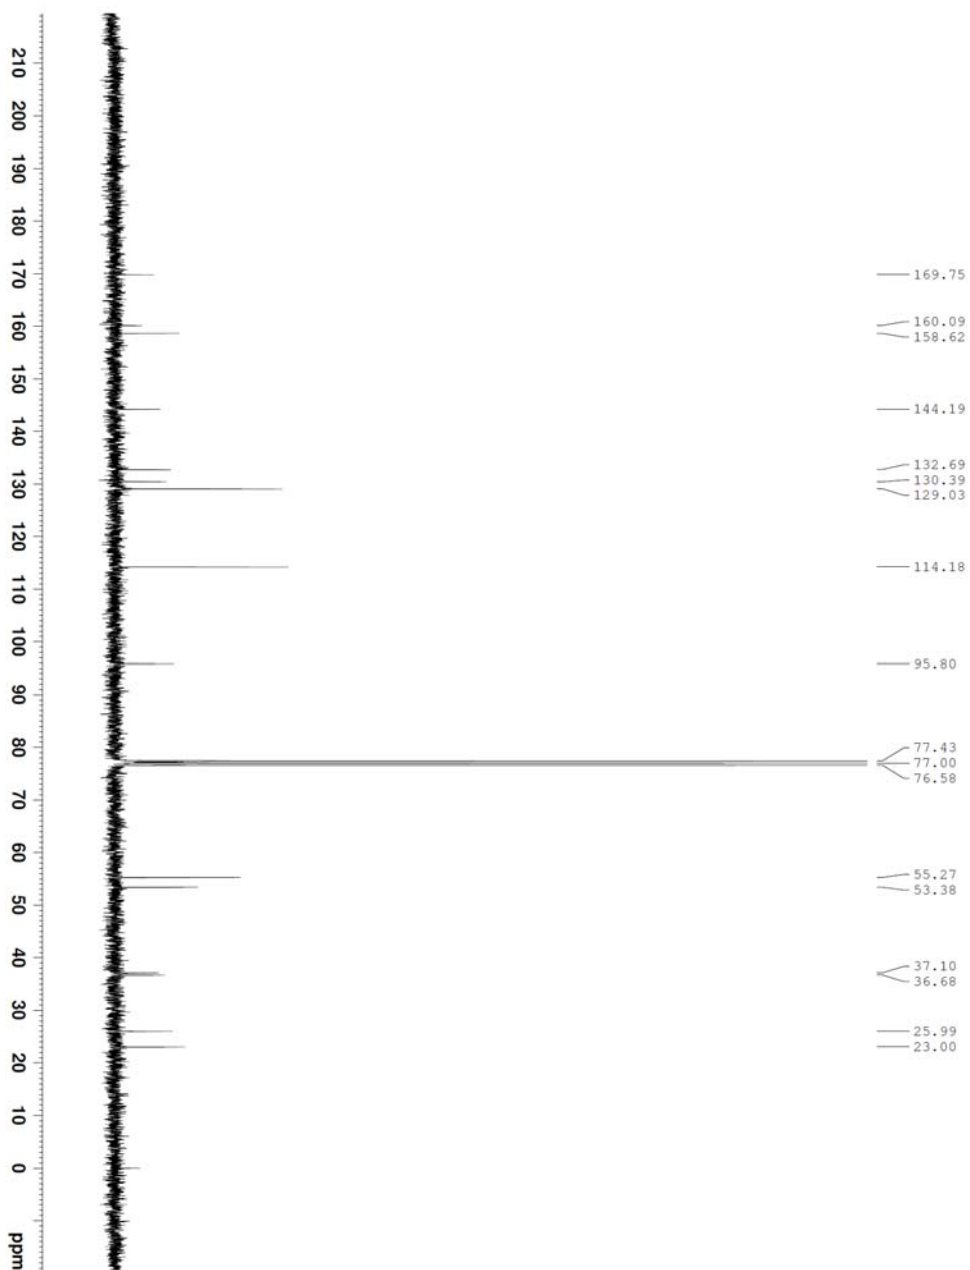

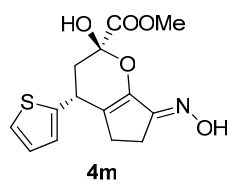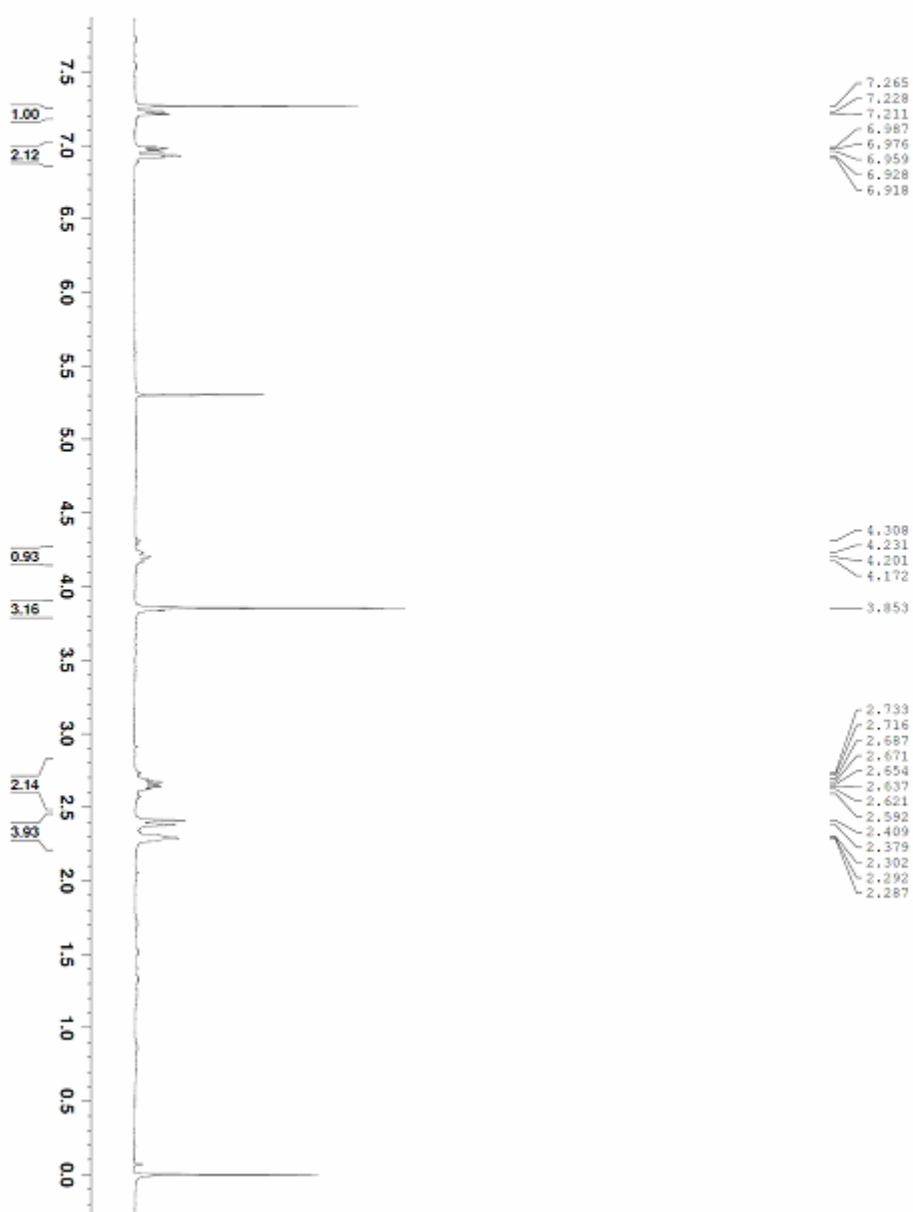

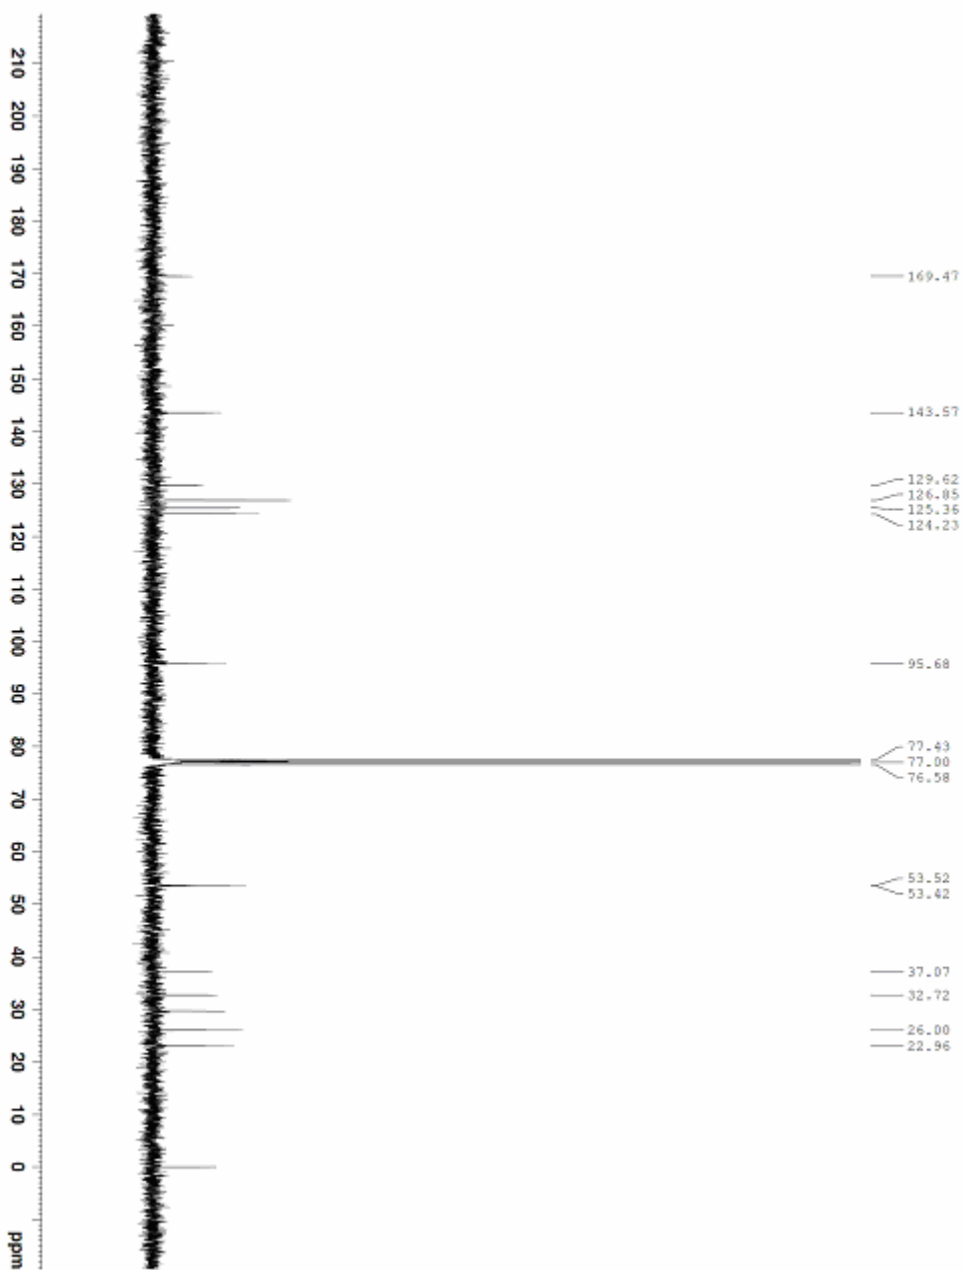

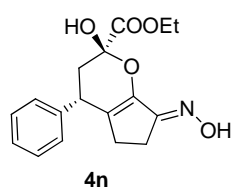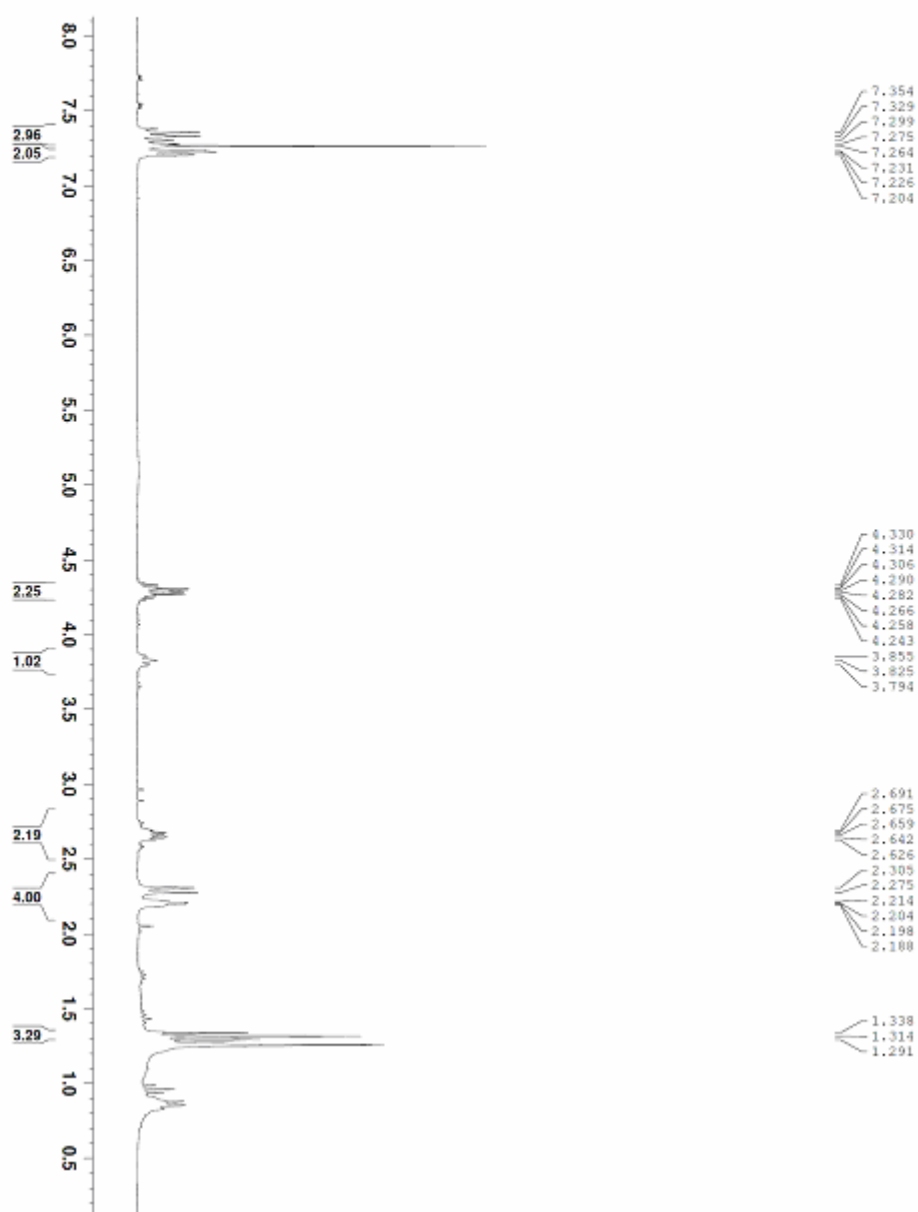



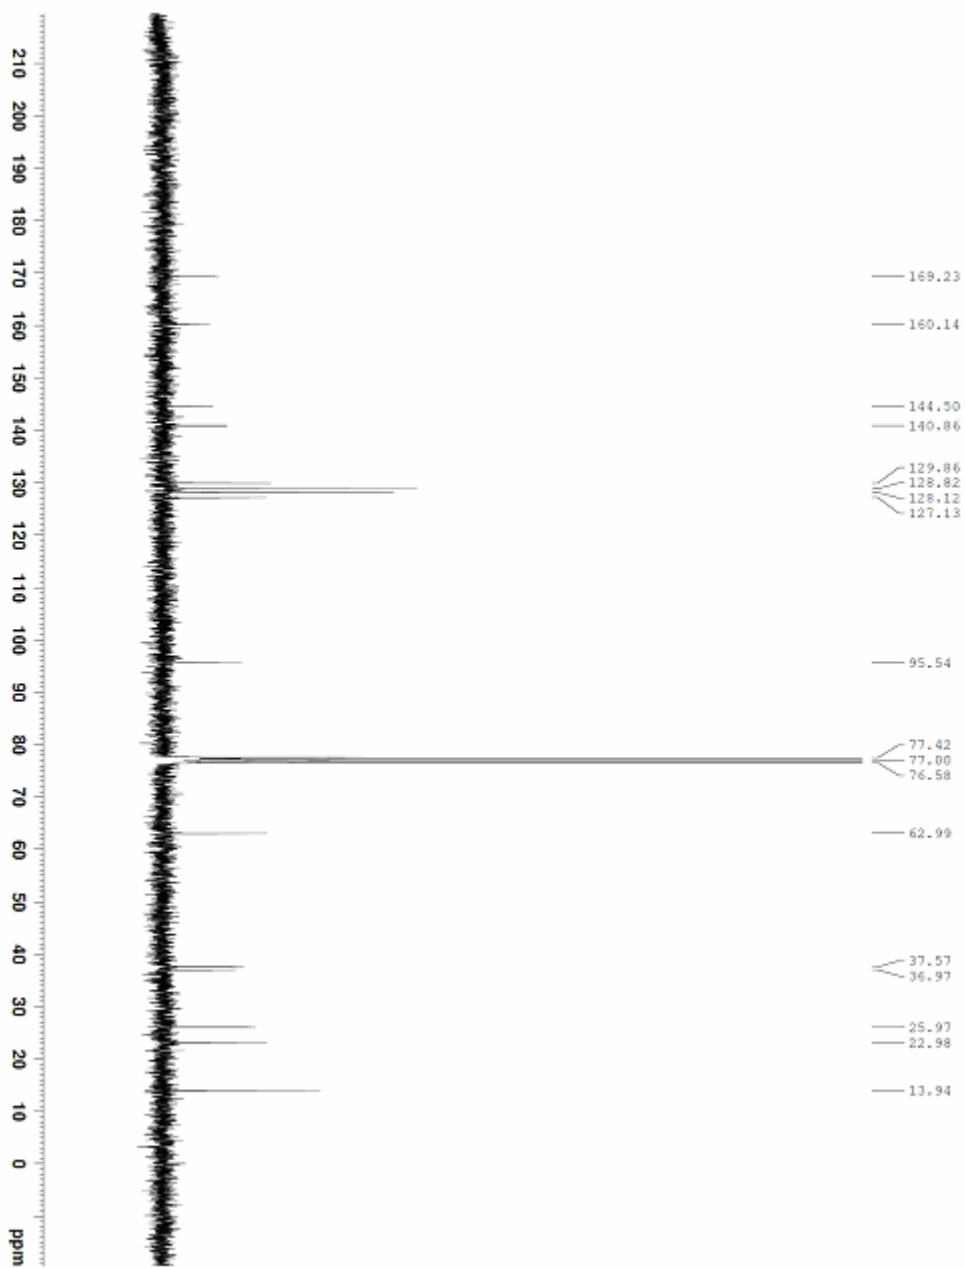

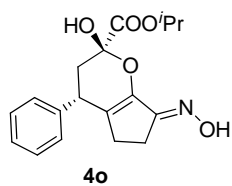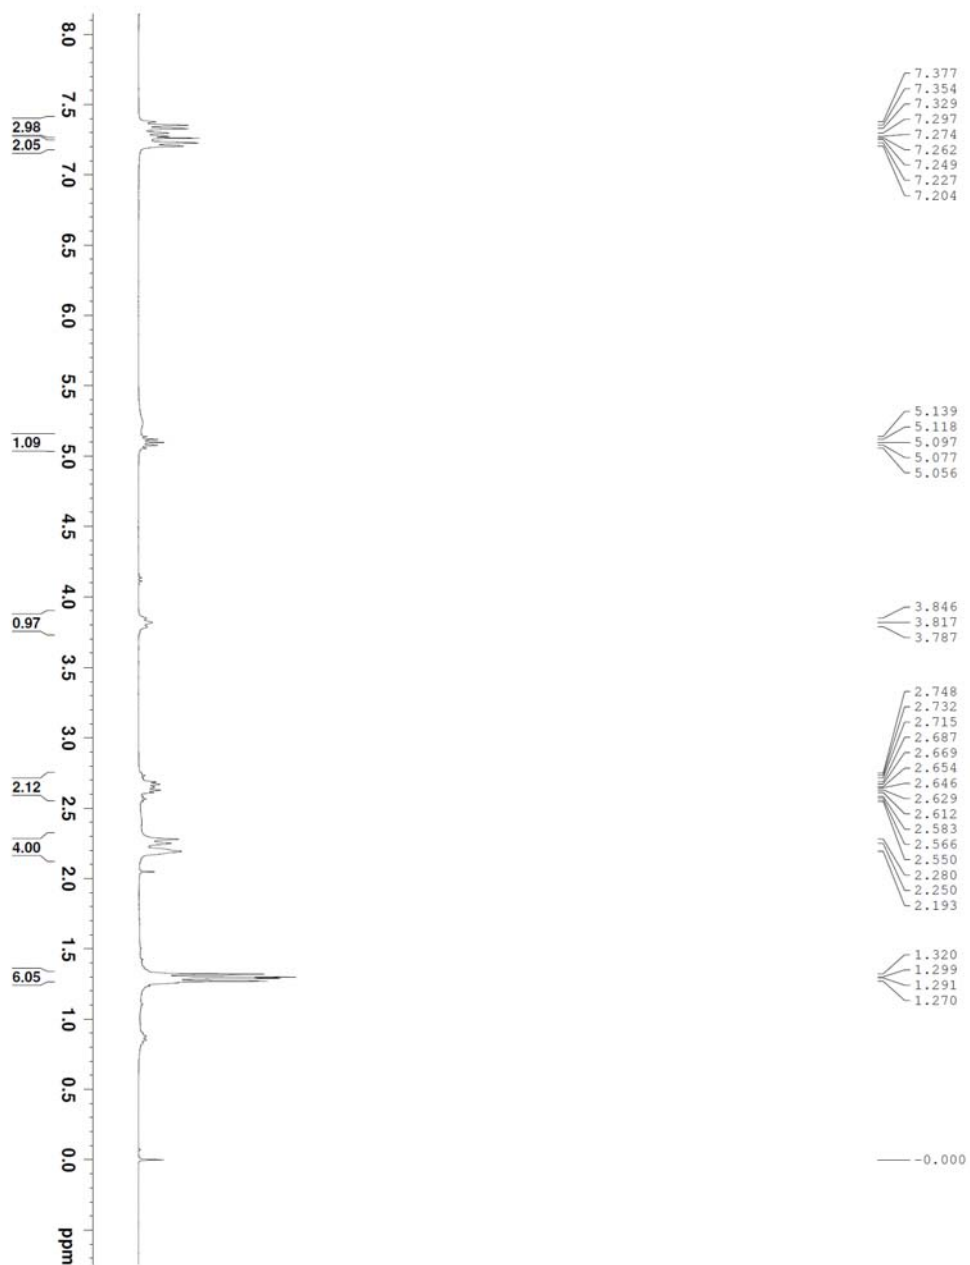

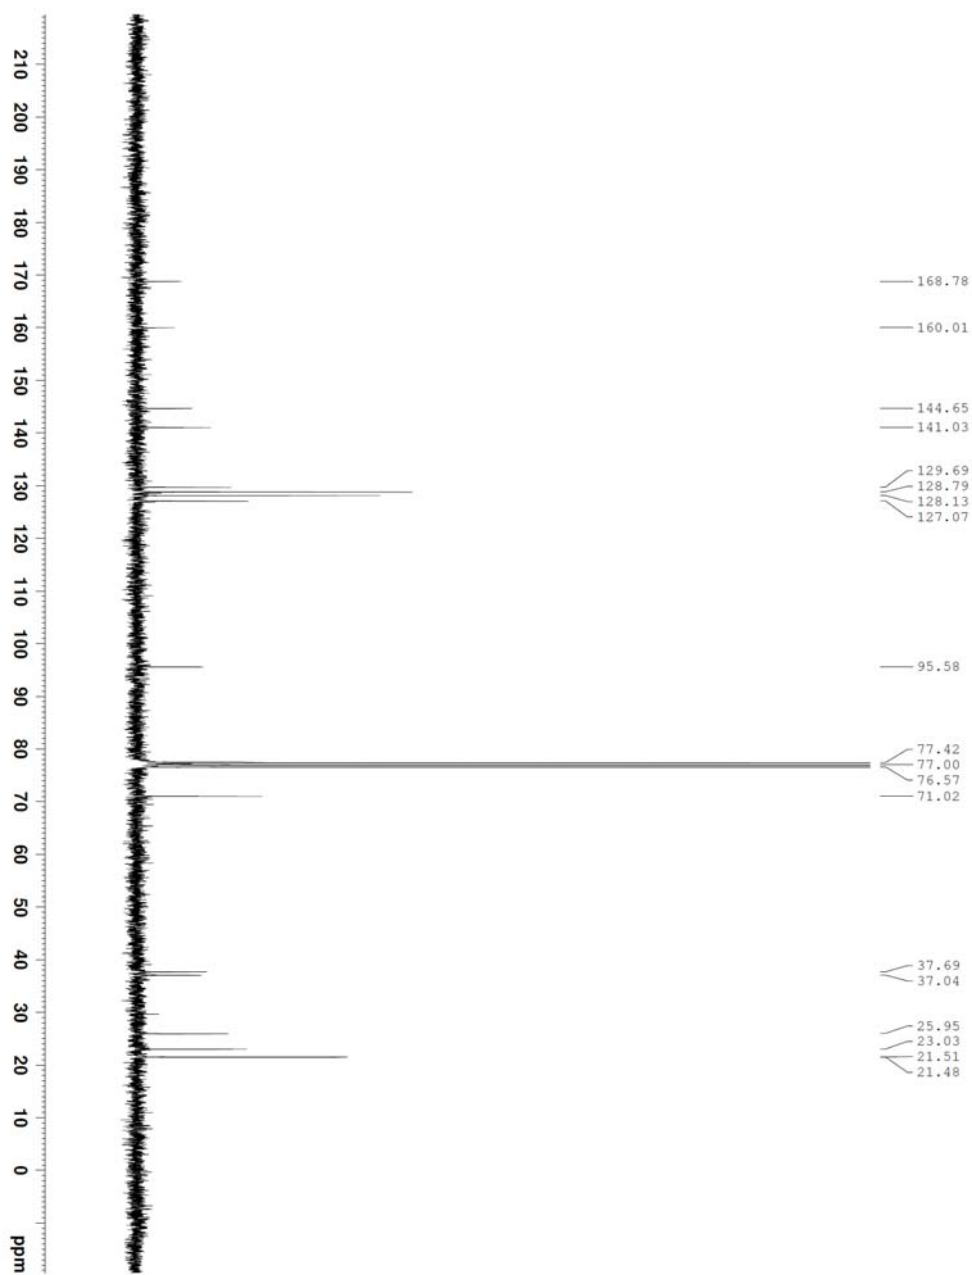

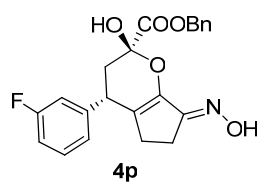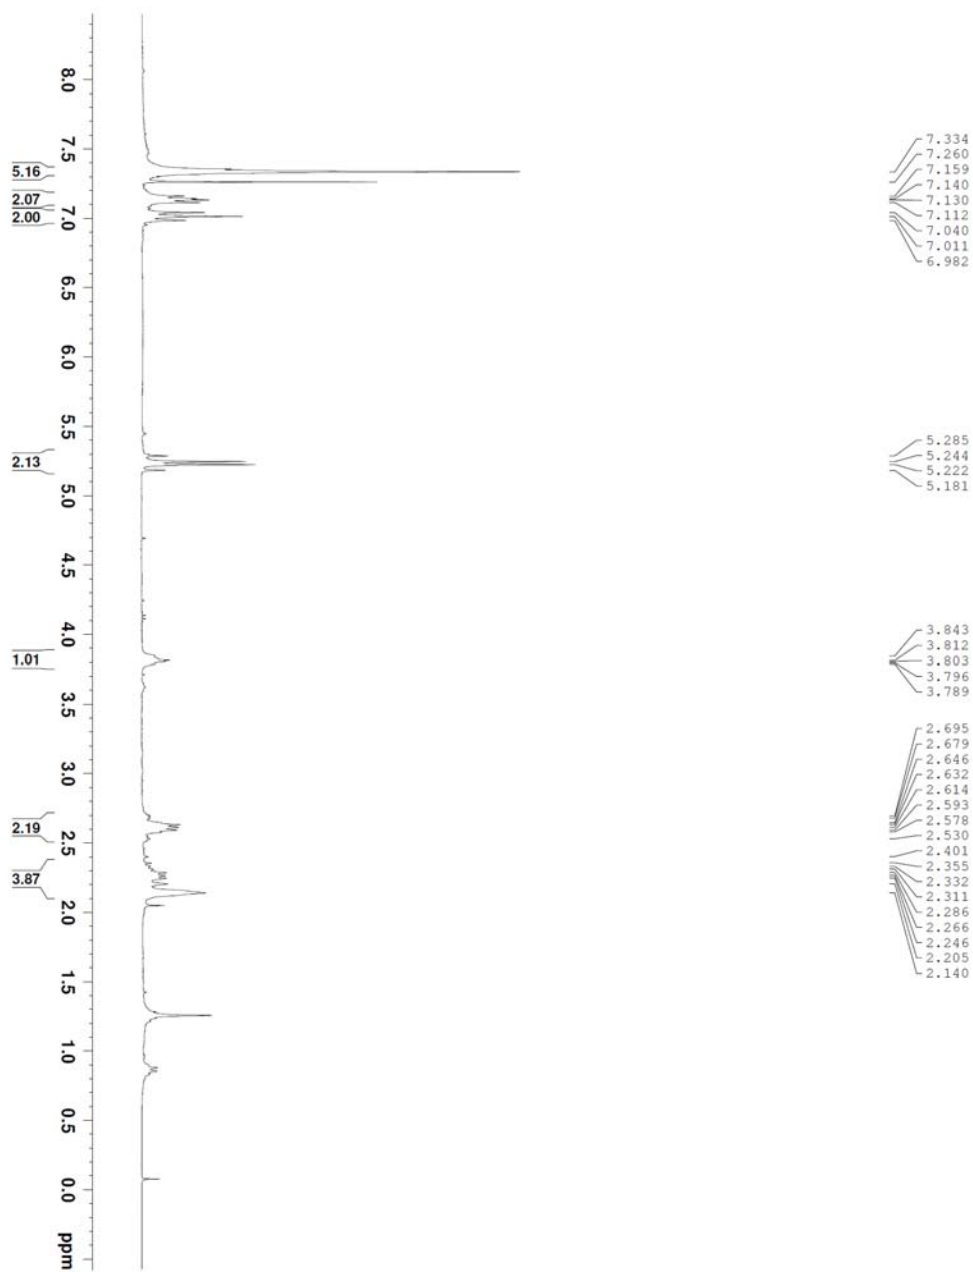

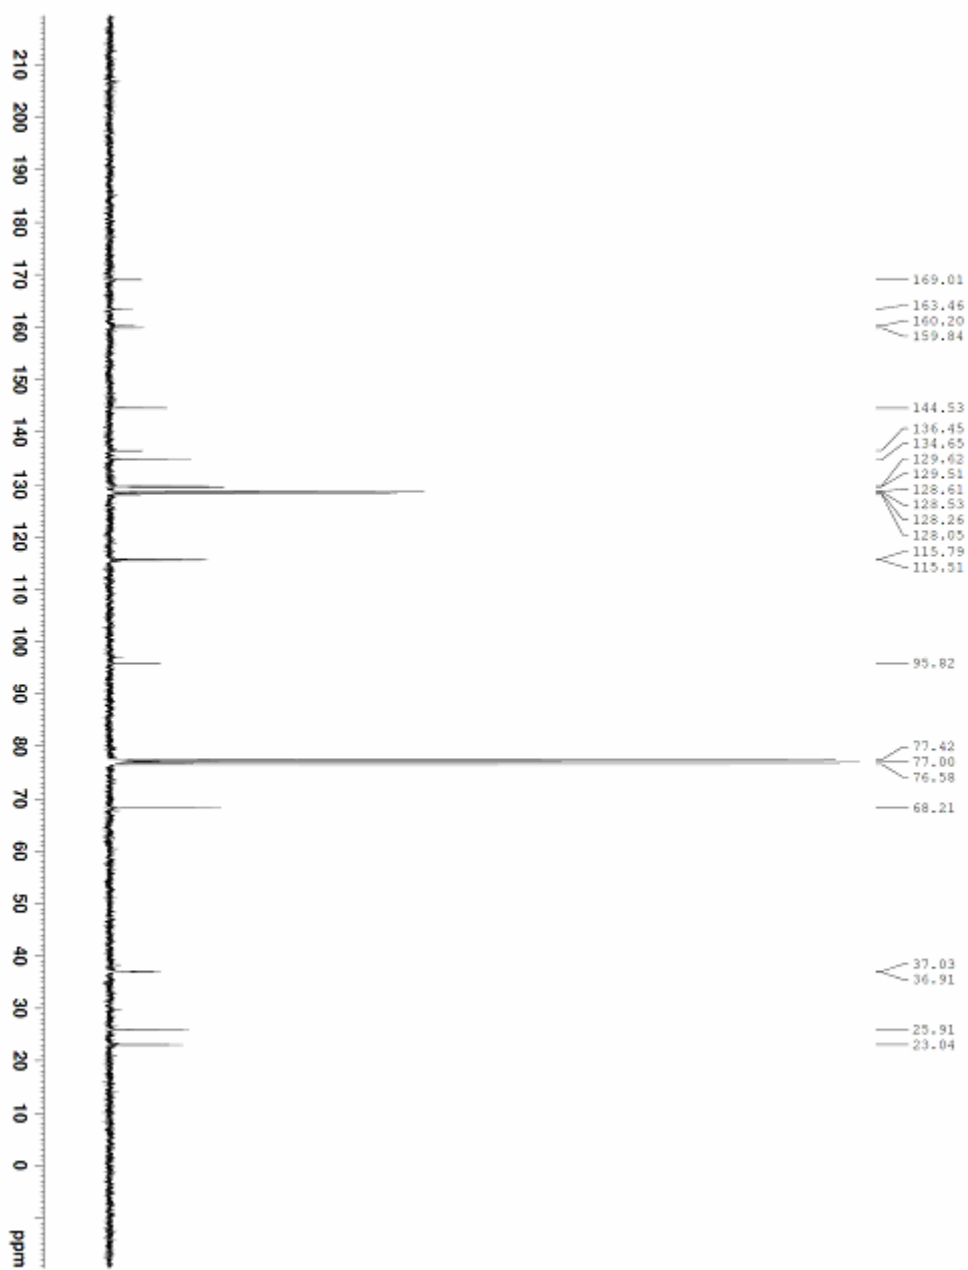

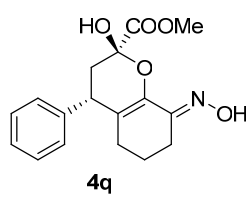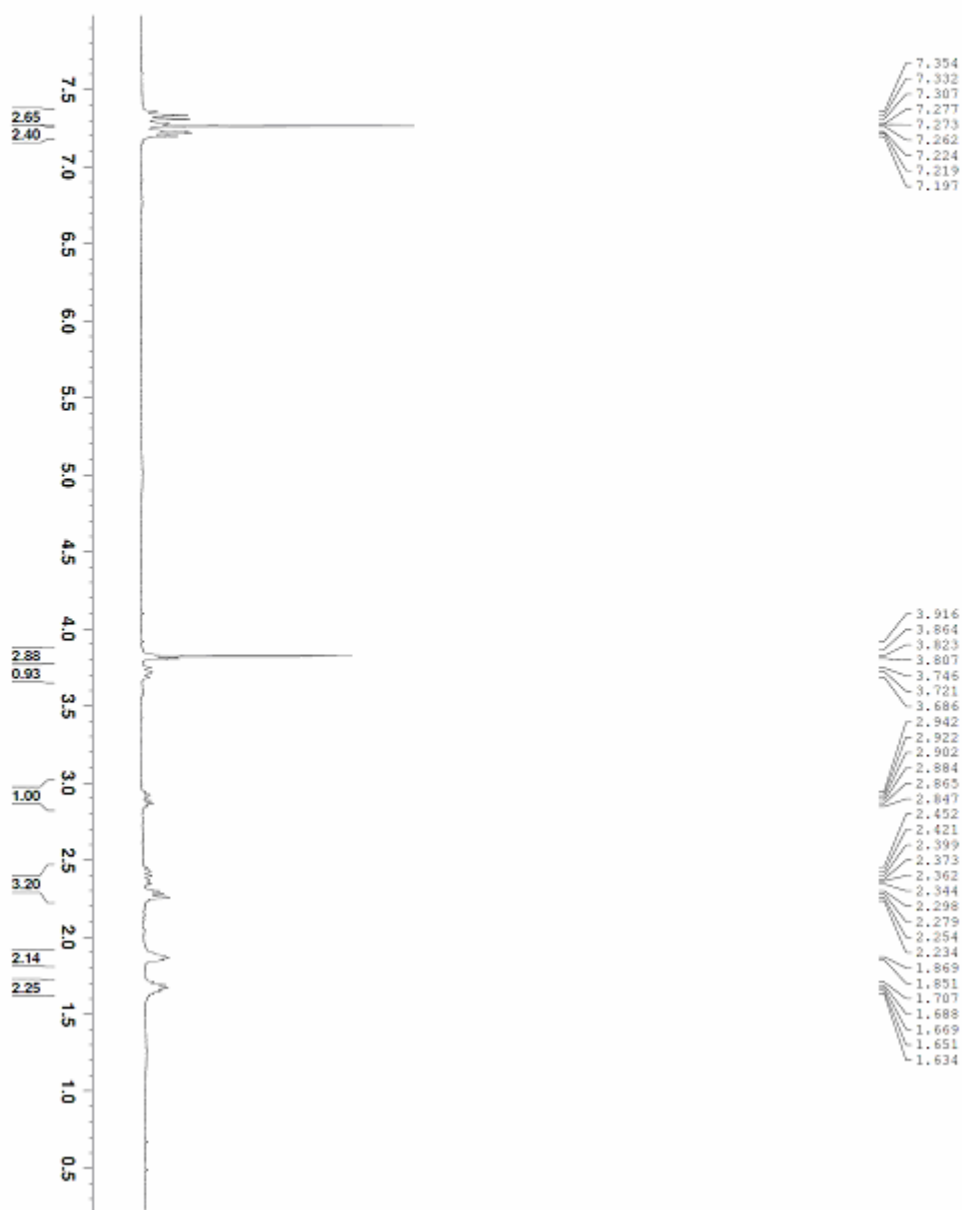

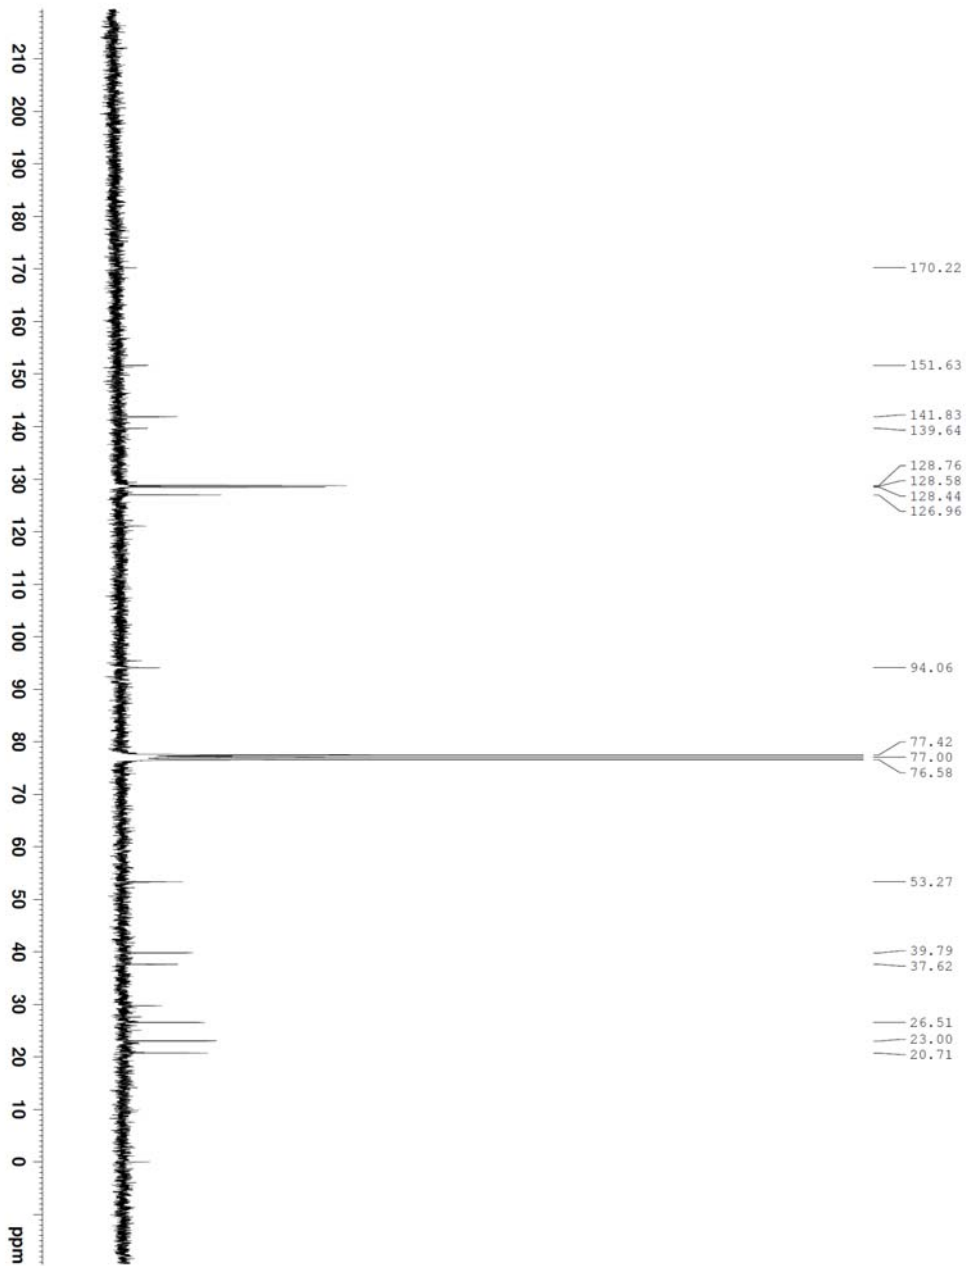

Supplement: c3ob41001c.pdf [file c3ob41001c.pdf]
